# Supplementary material
Source: PubMed Central journal article supplement (PMC6309520)

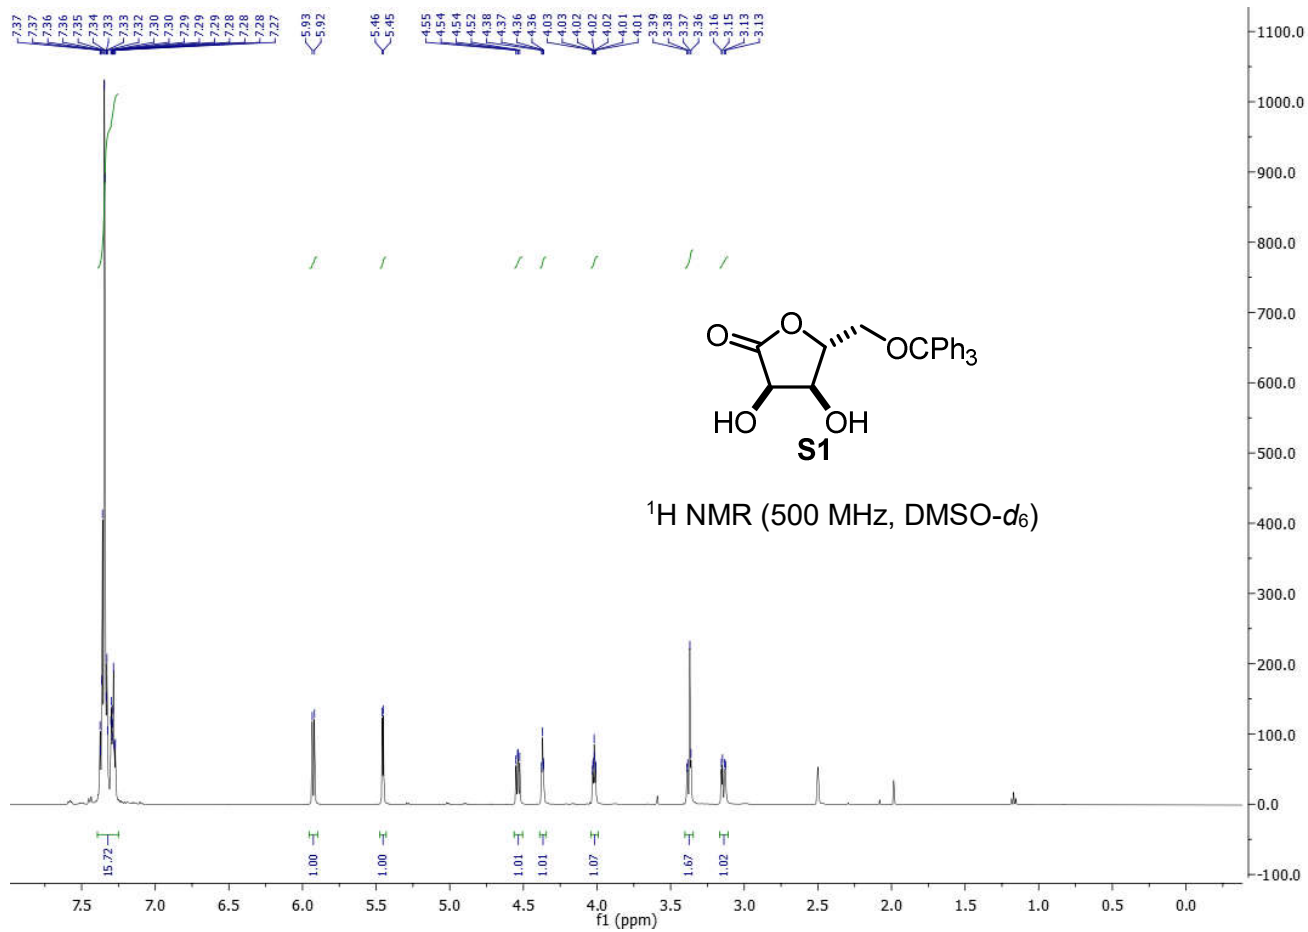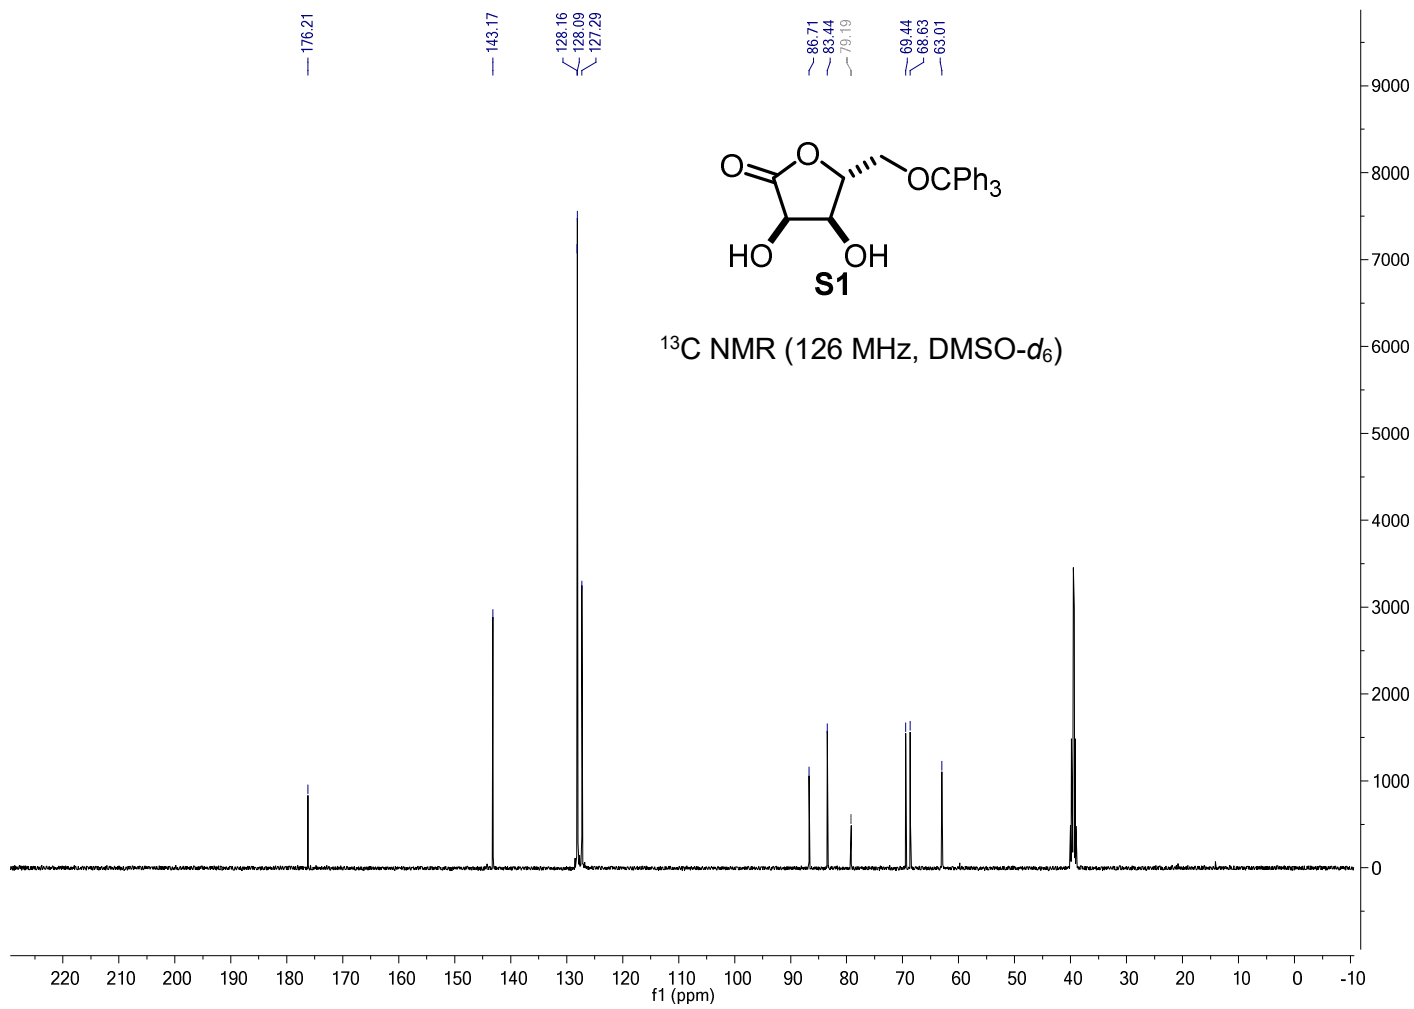

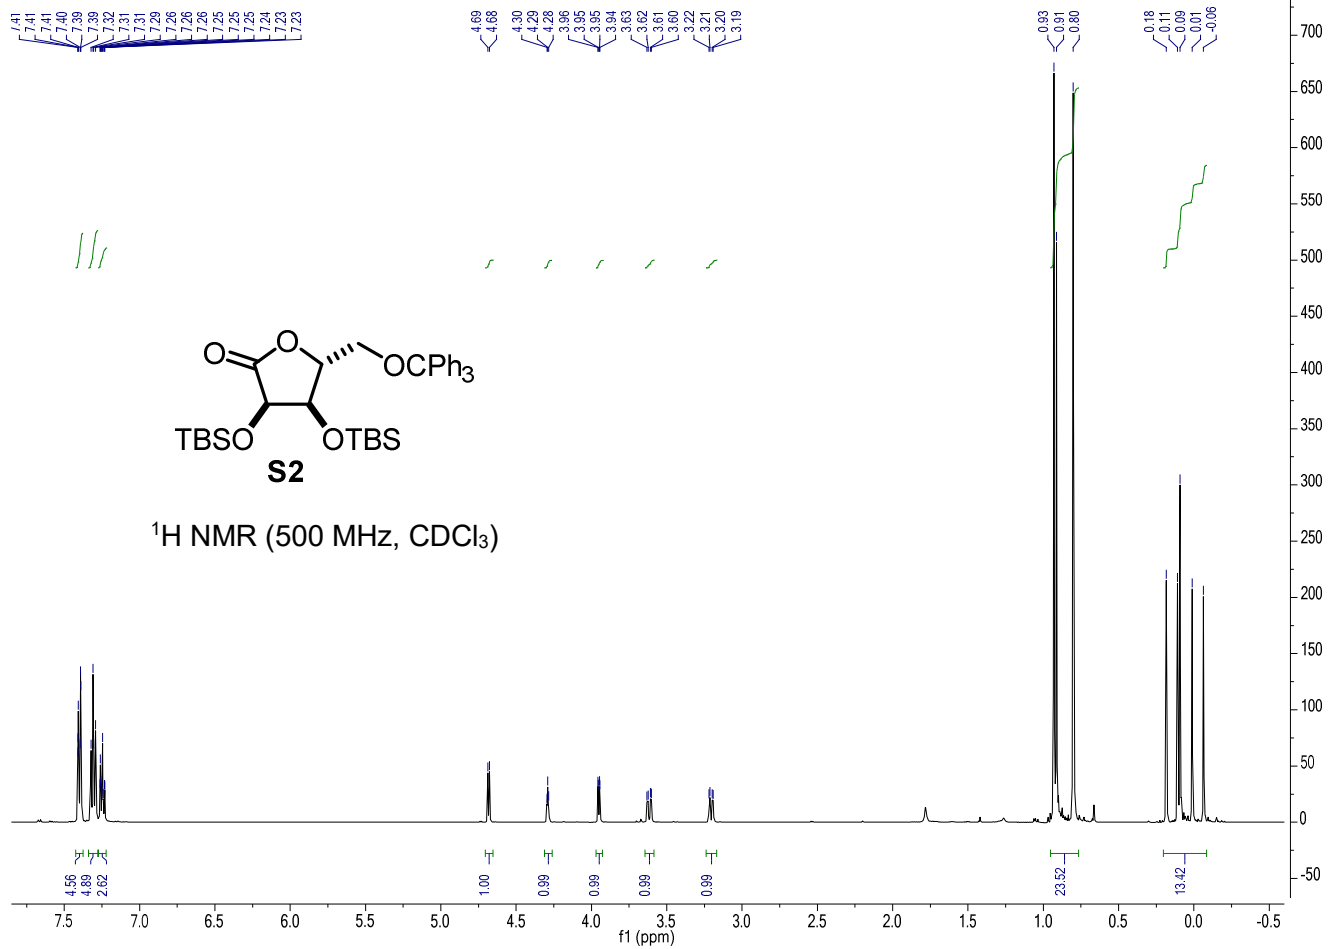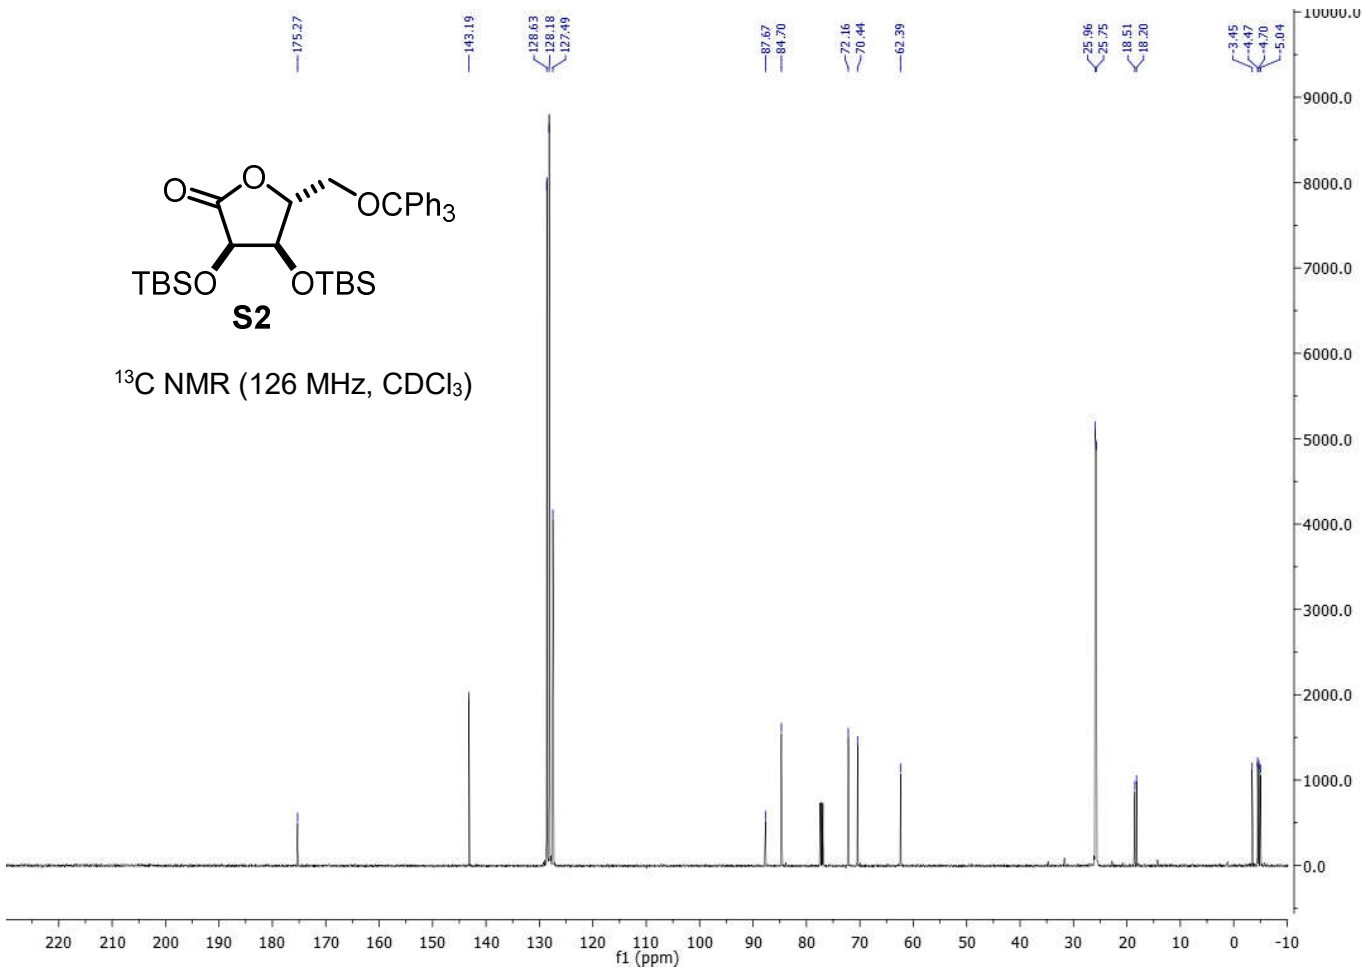

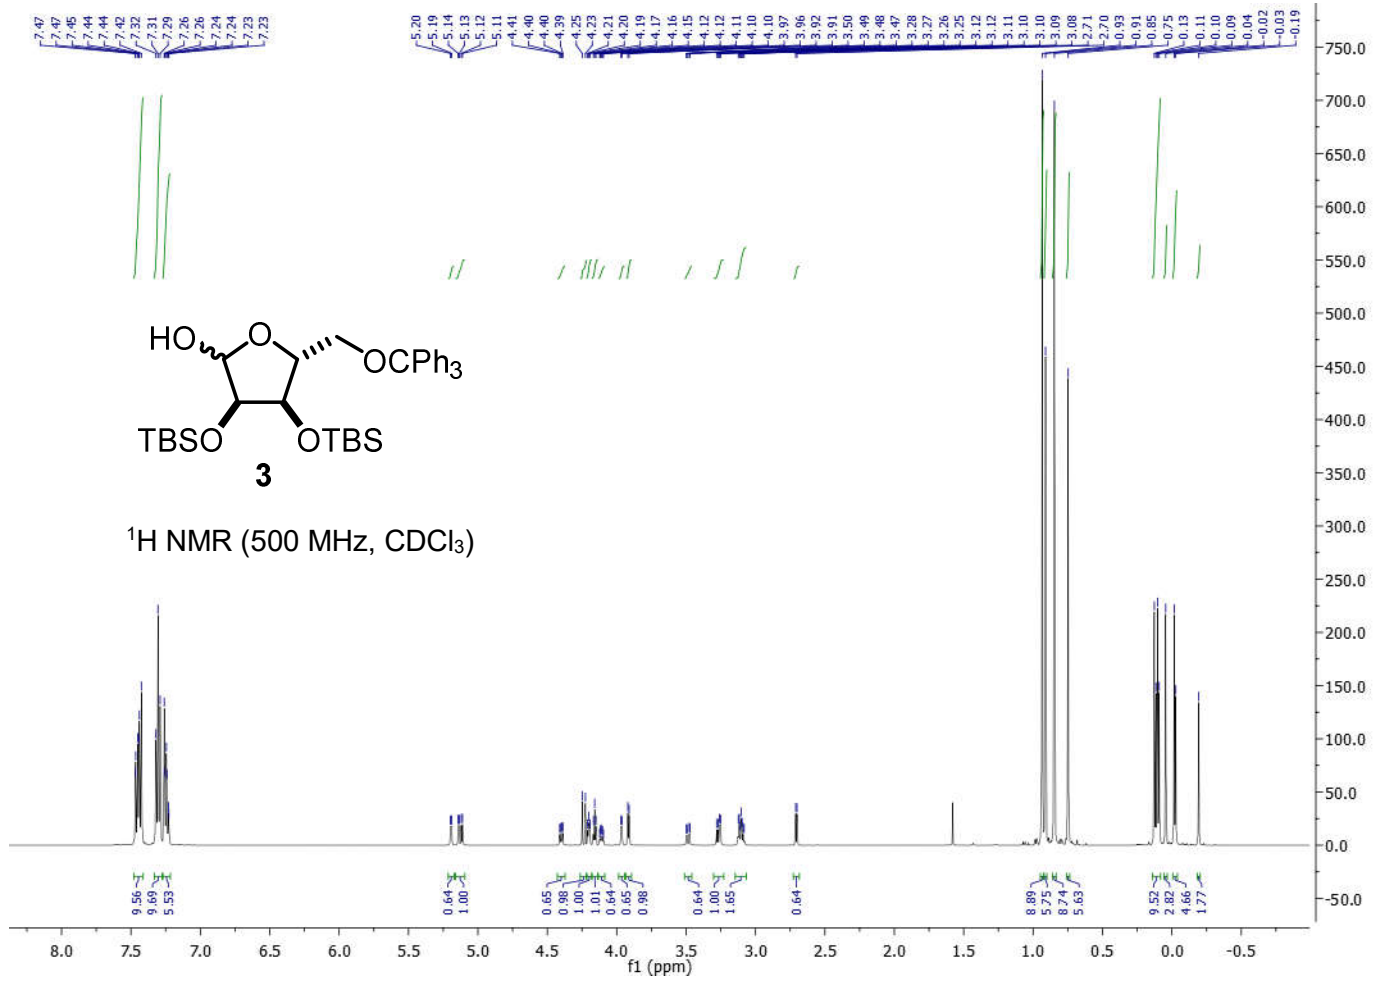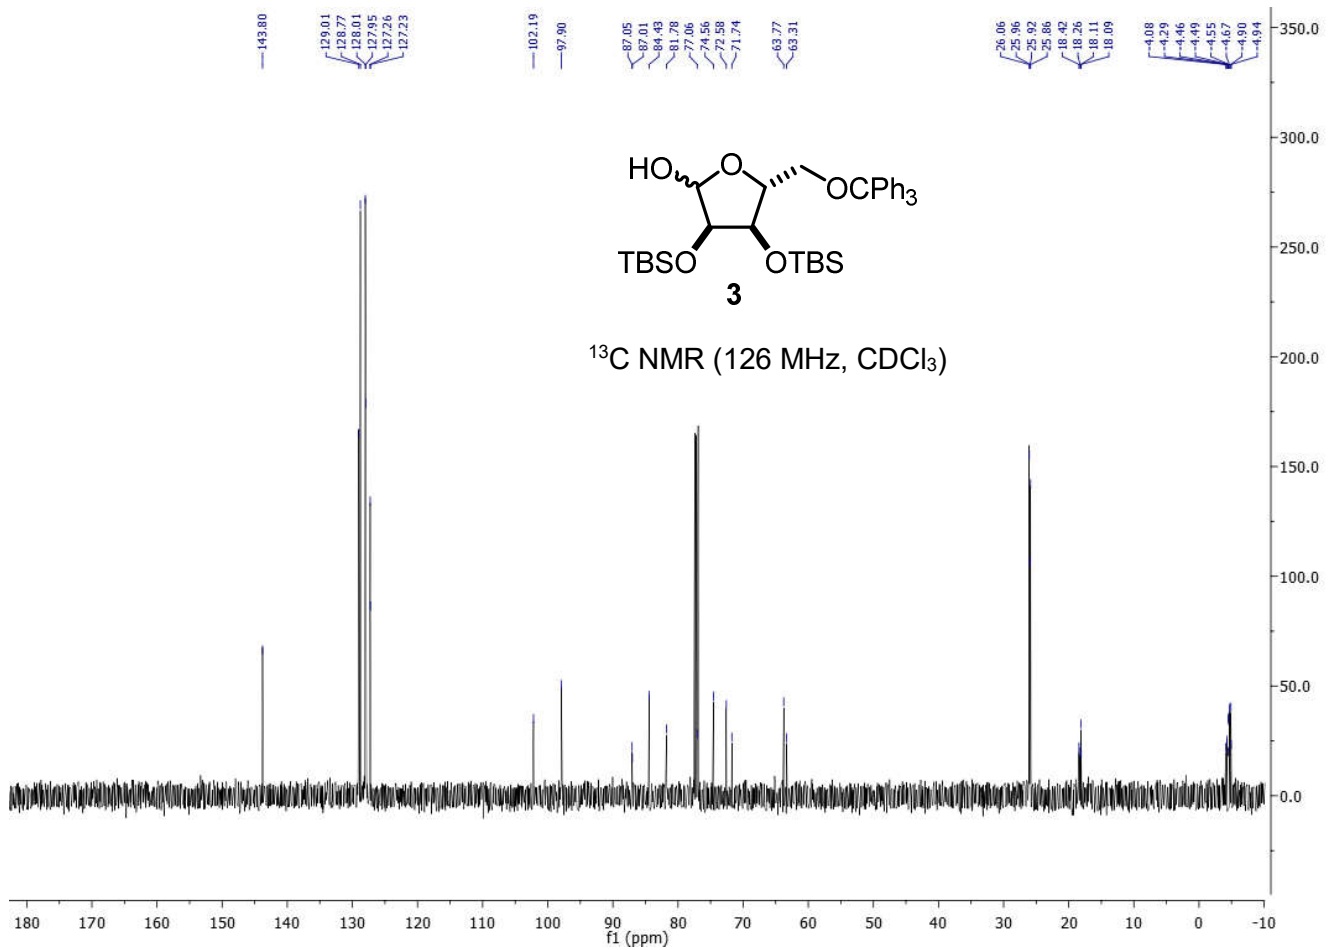

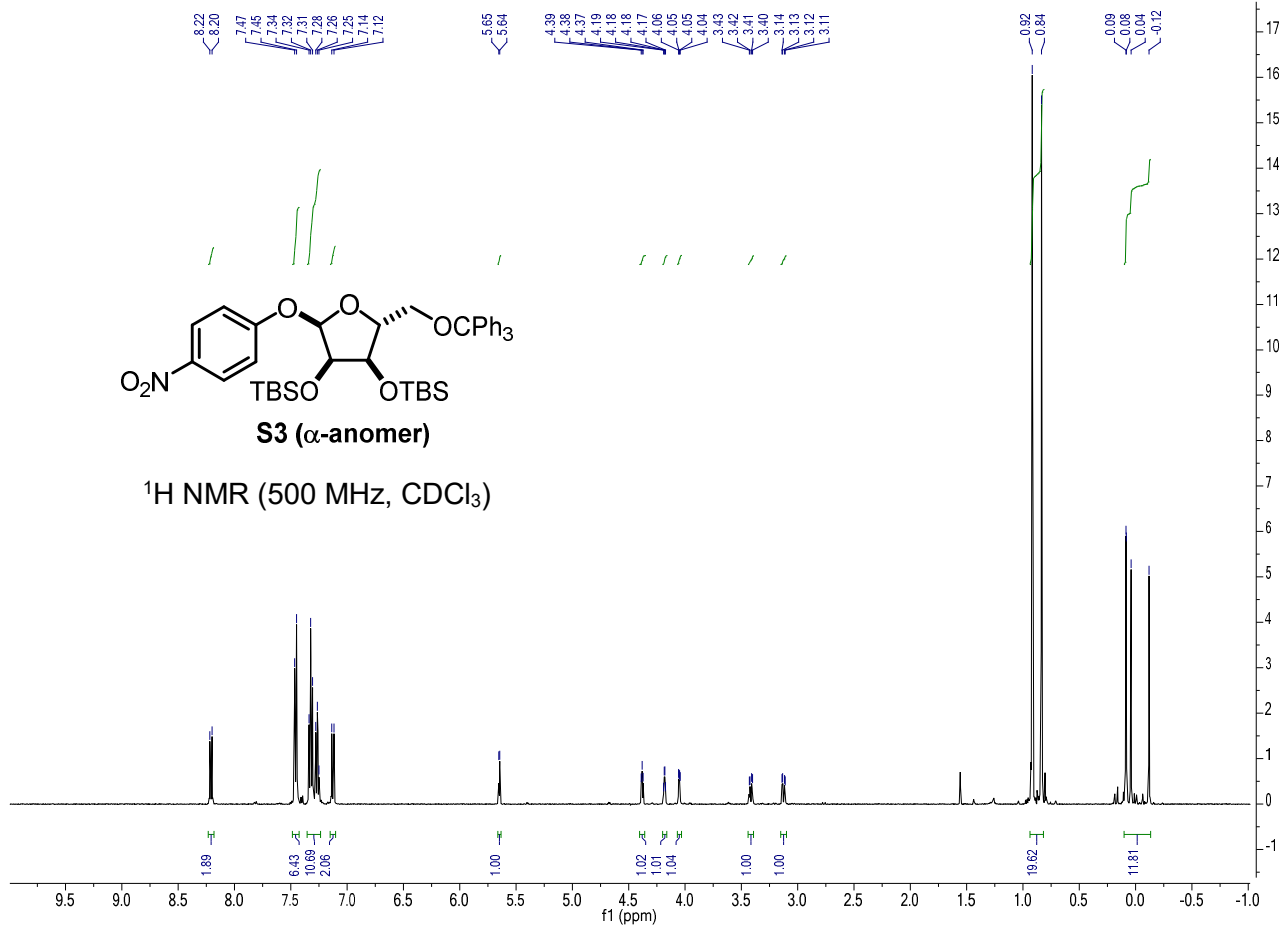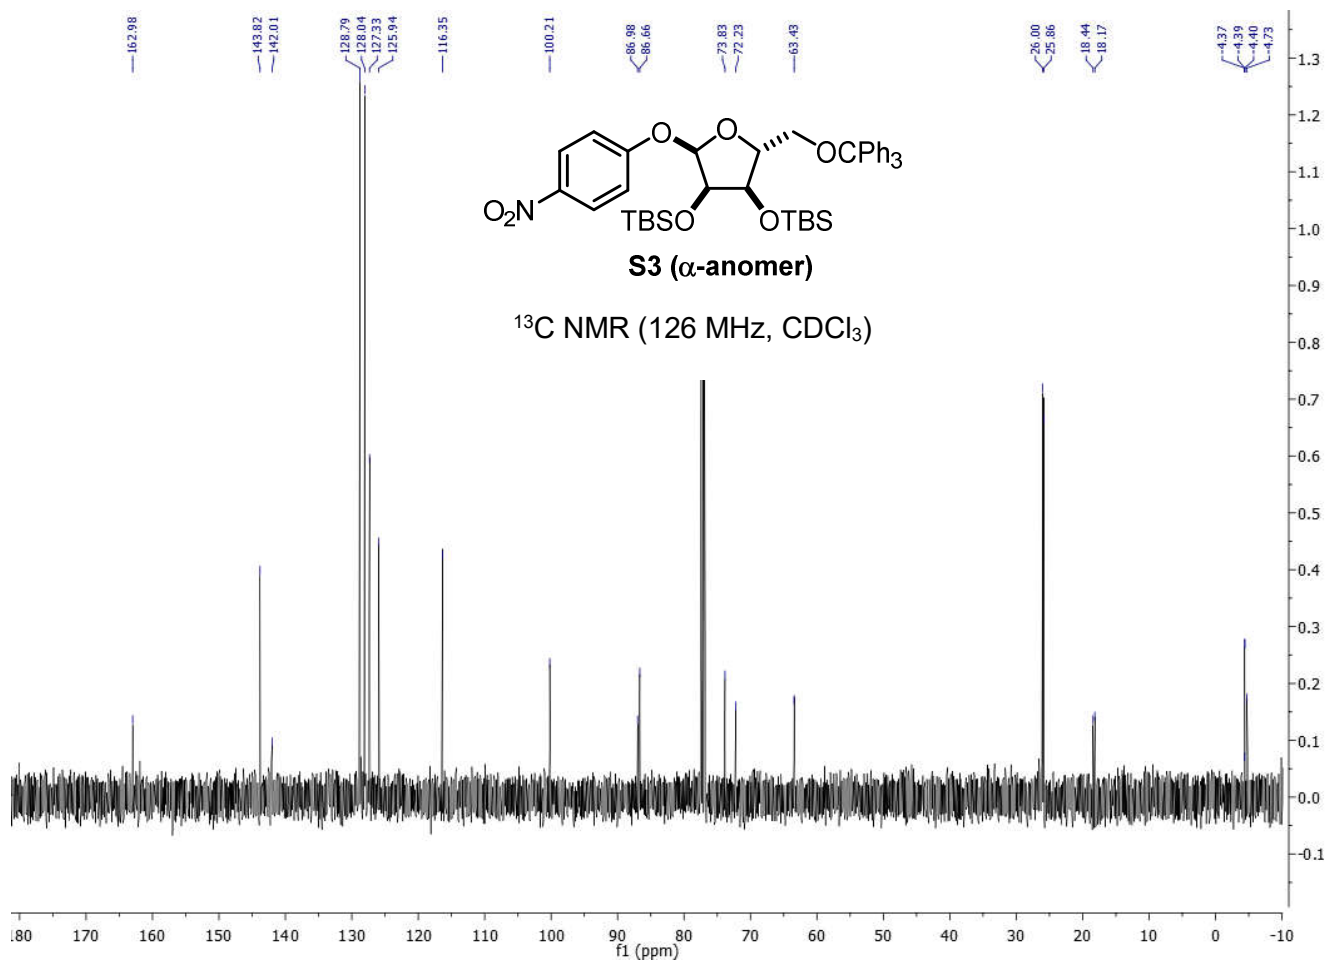

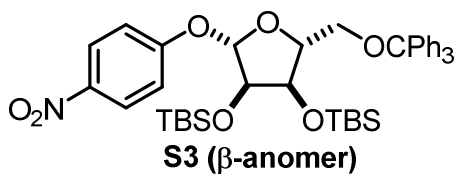

<sup>1</sup>H NMR (500 MHz, CDCl<sub>3</sub>)

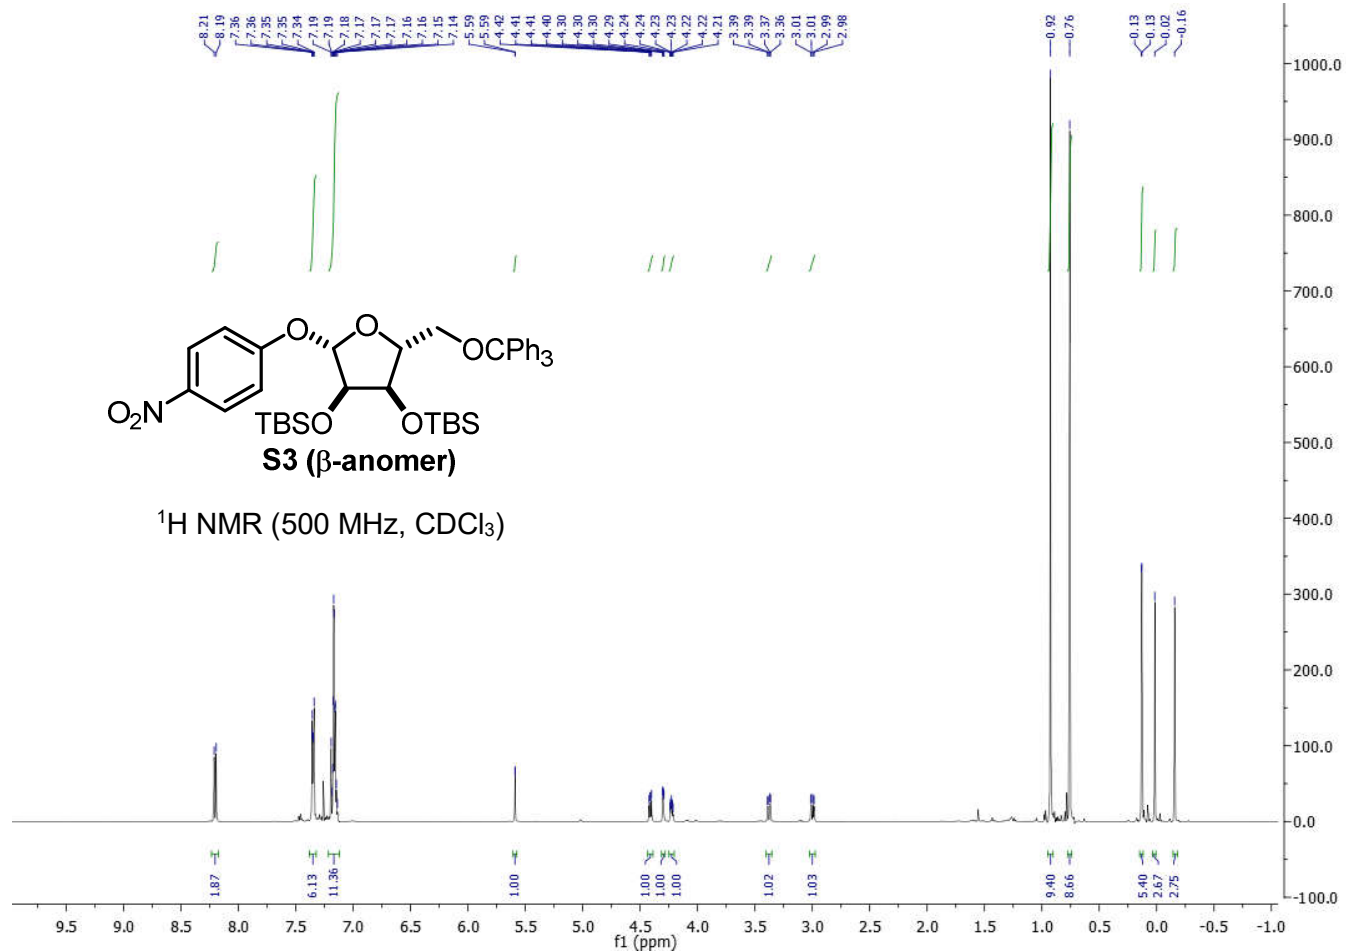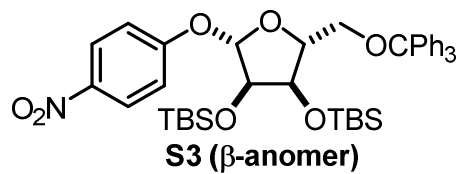

<sup>13</sup>C NMR (126 MHz, CDCl<sub>3</sub>)

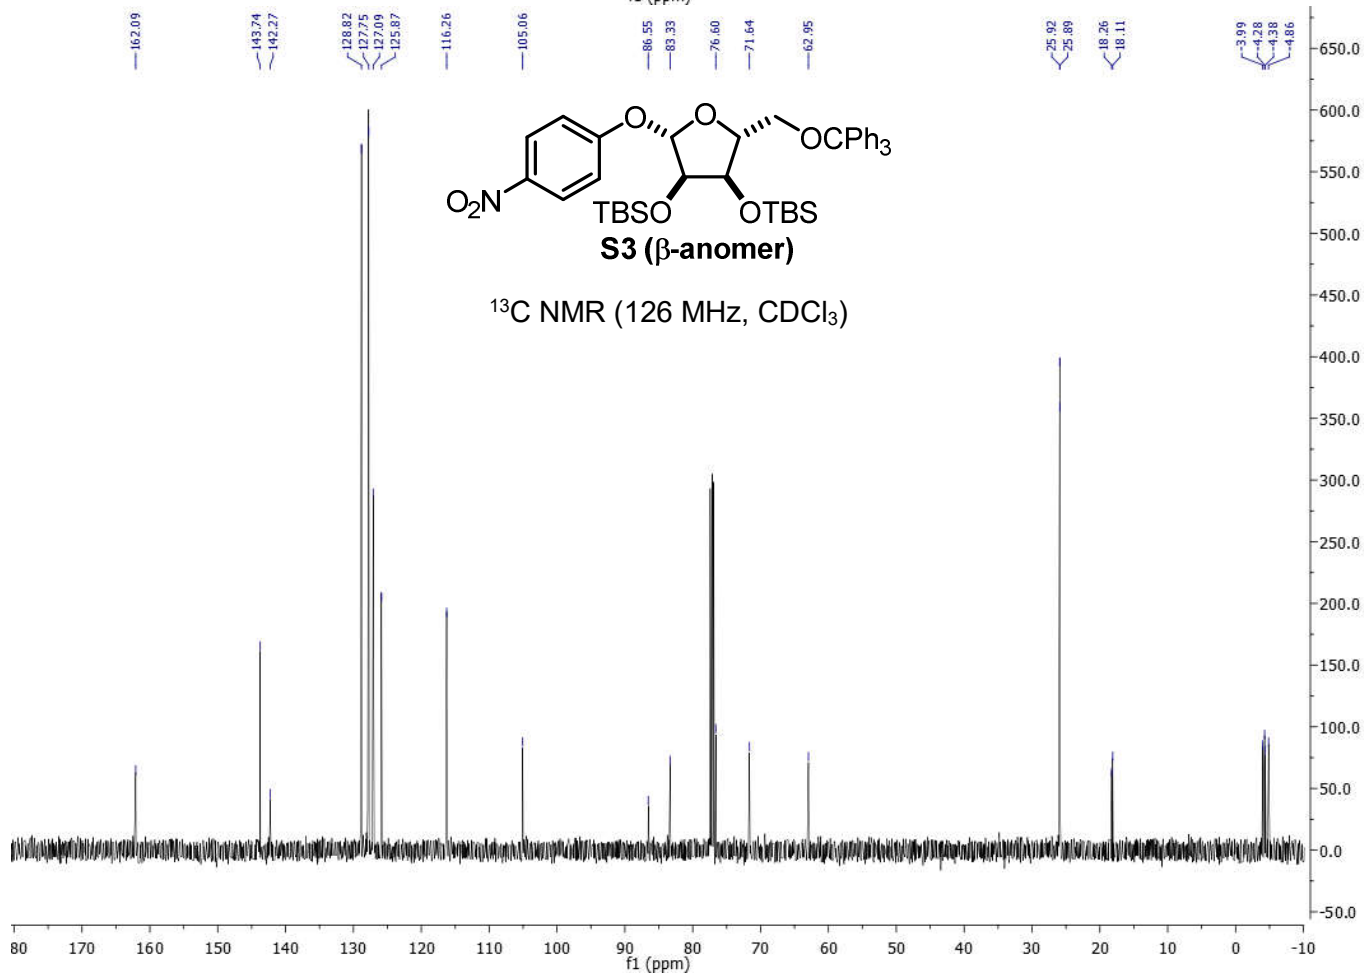

<sup>1</sup>H DPGSE NOE (500 MHz, d<sub>6</sub>-acetone, mix = 300 ms, d1 = 10 s)

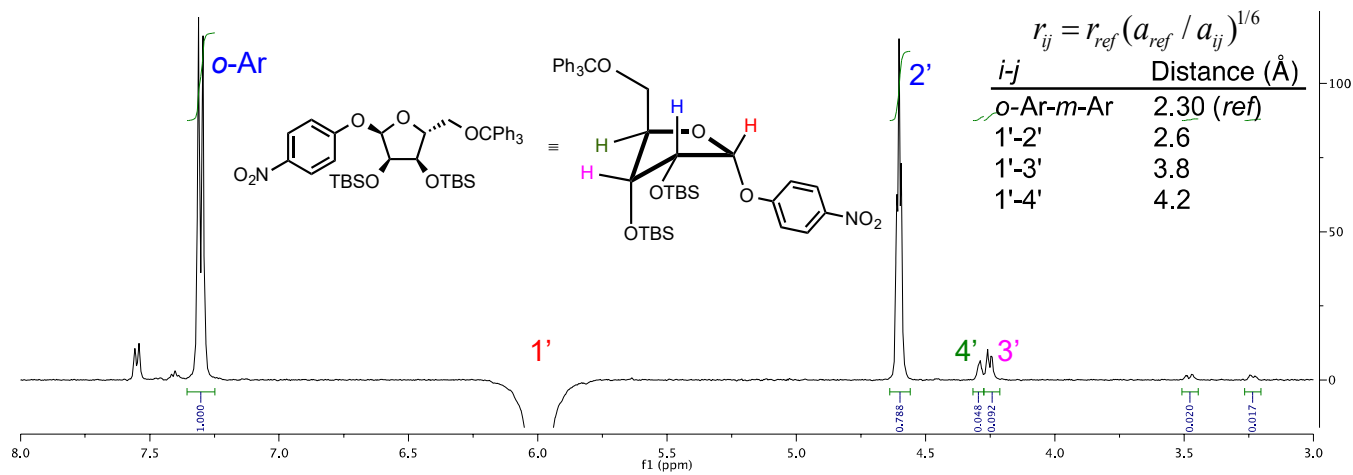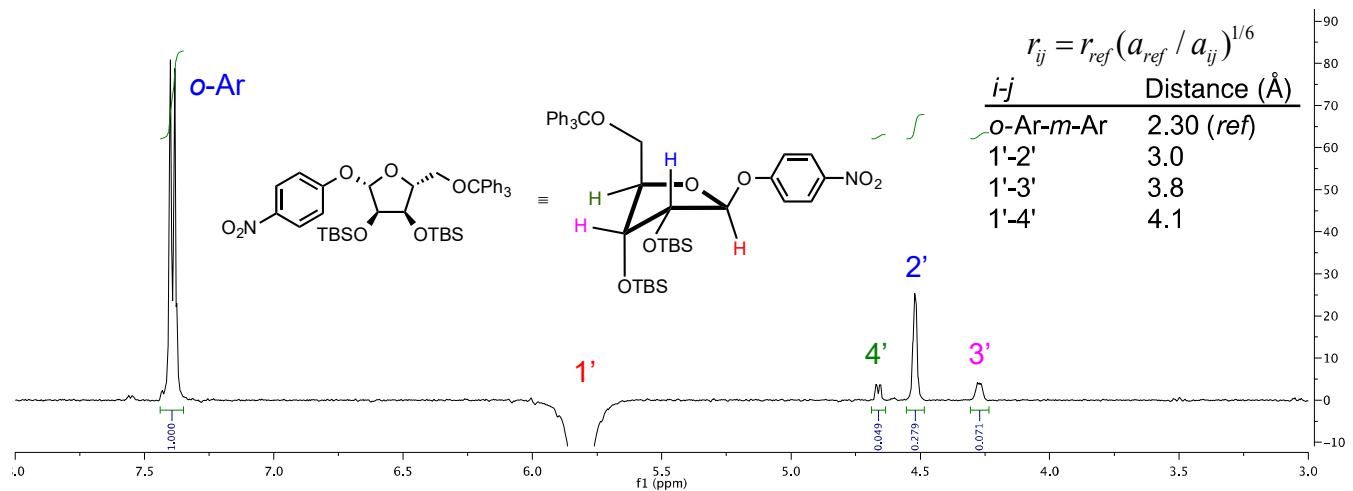

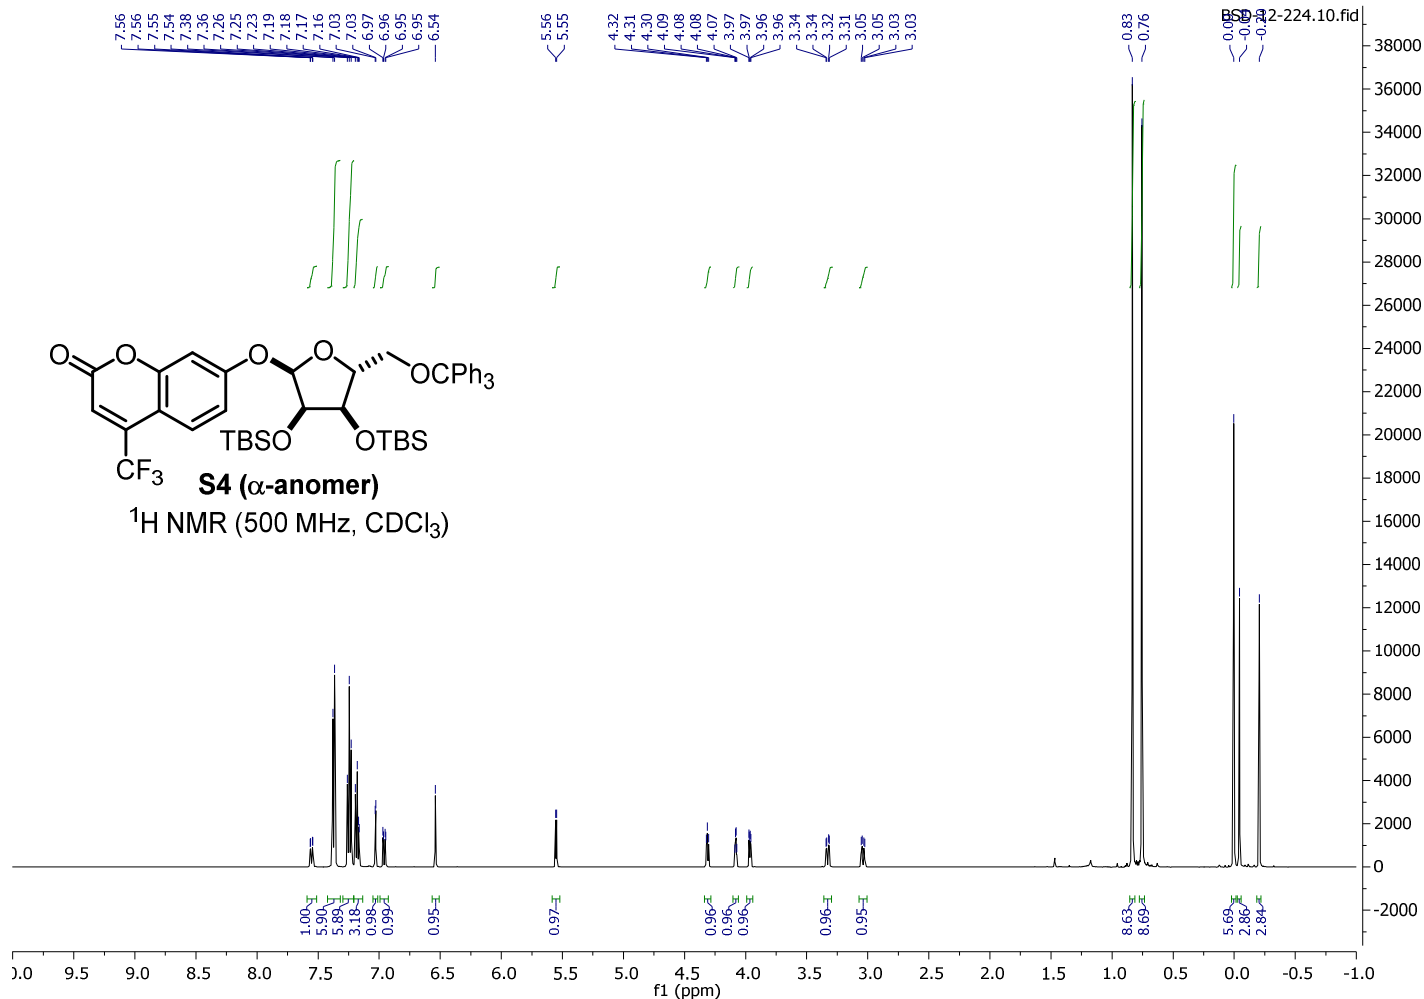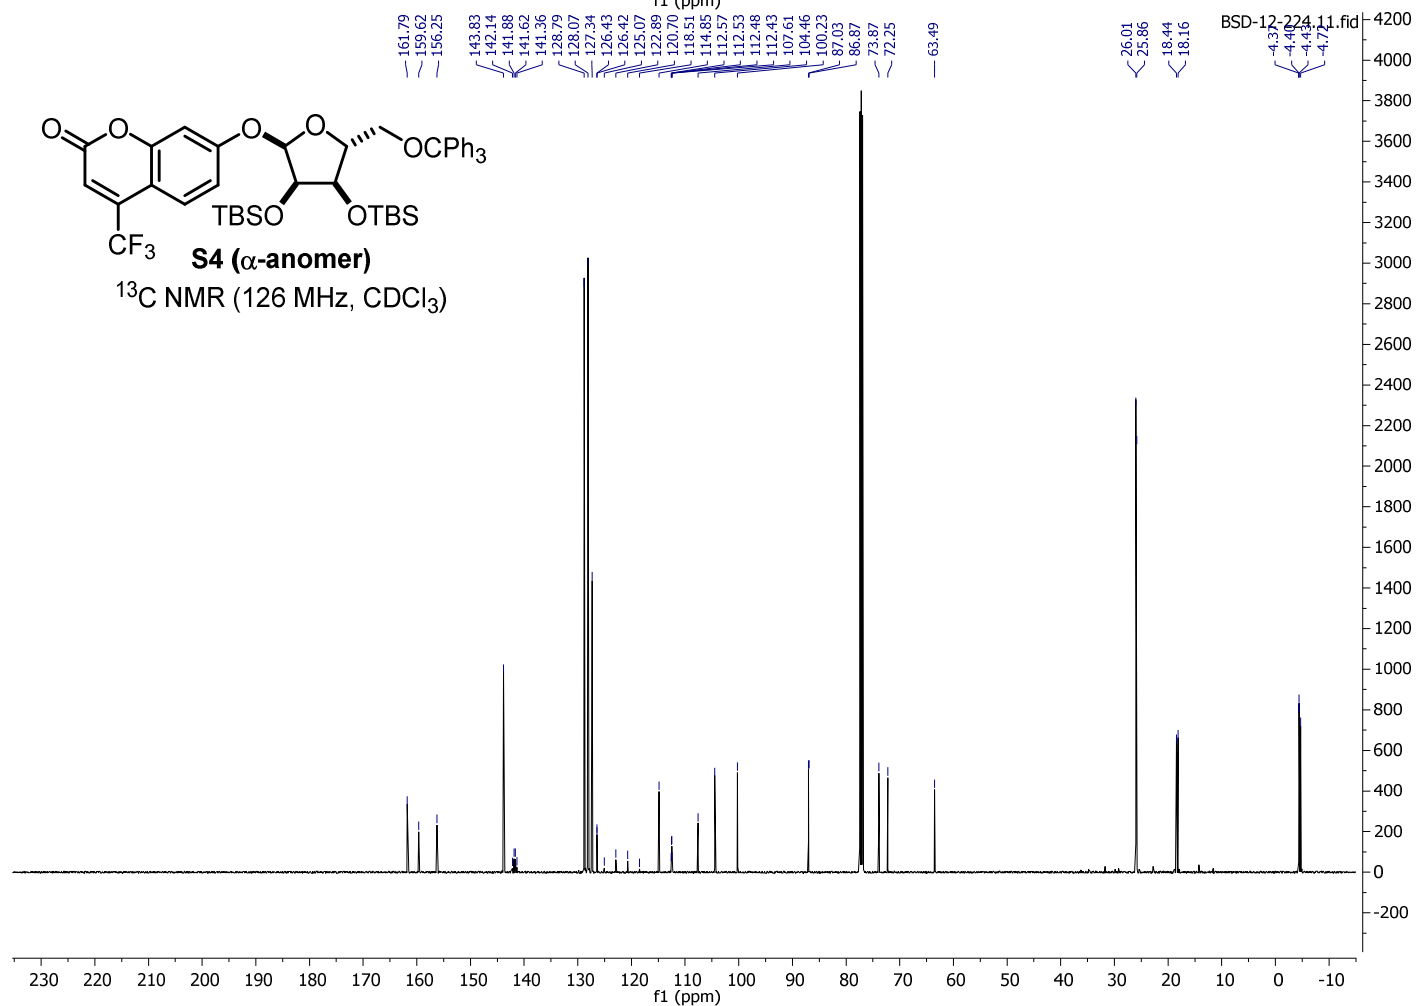

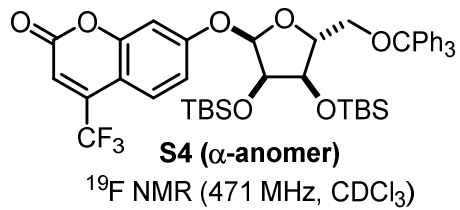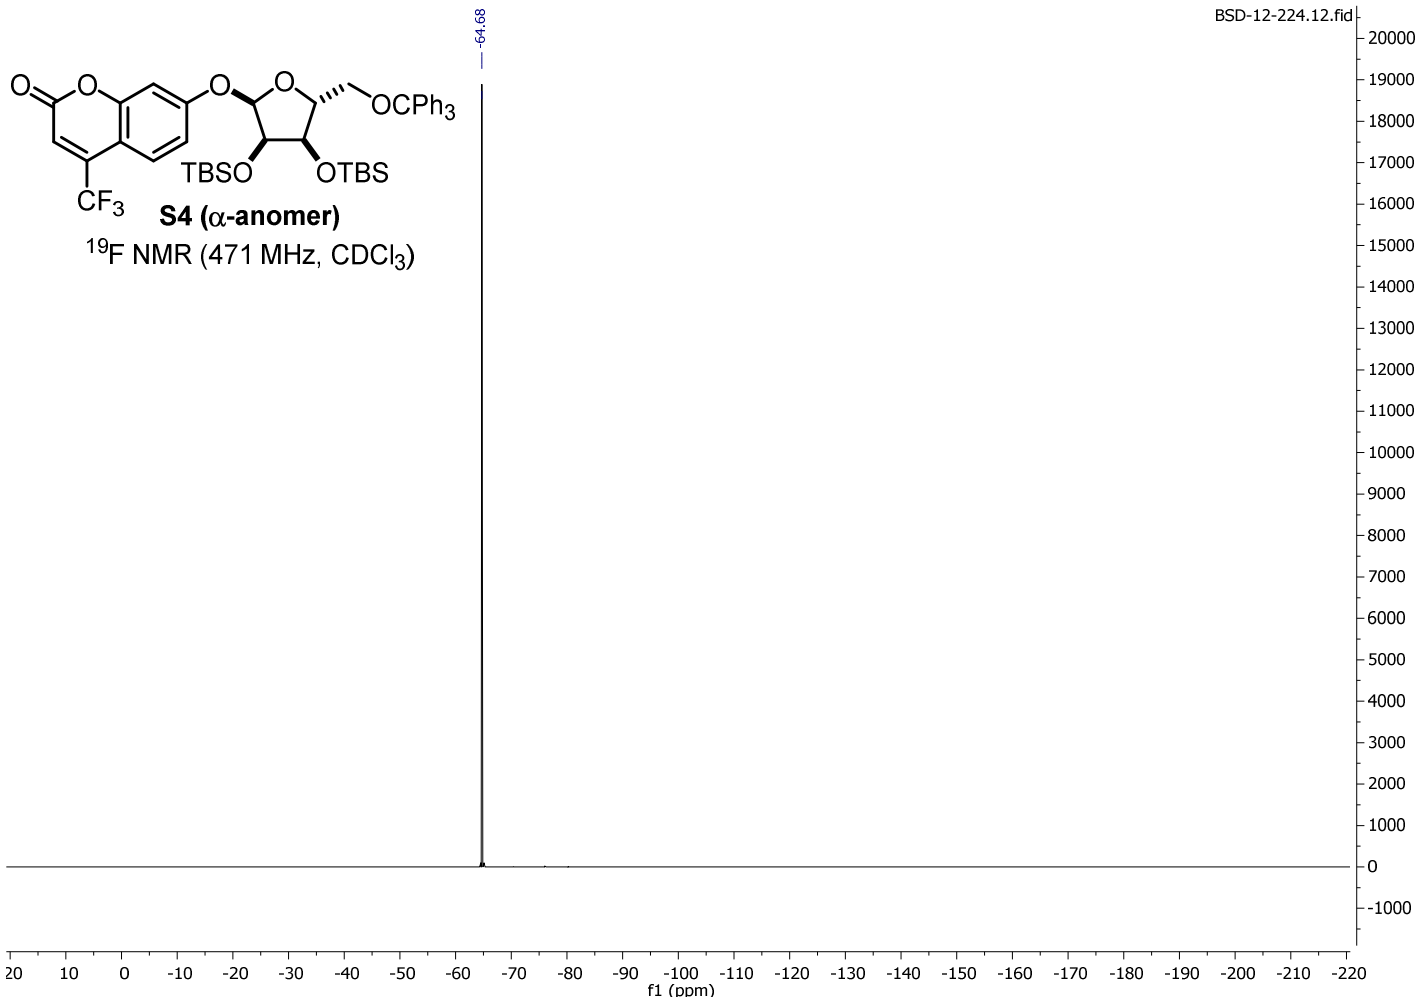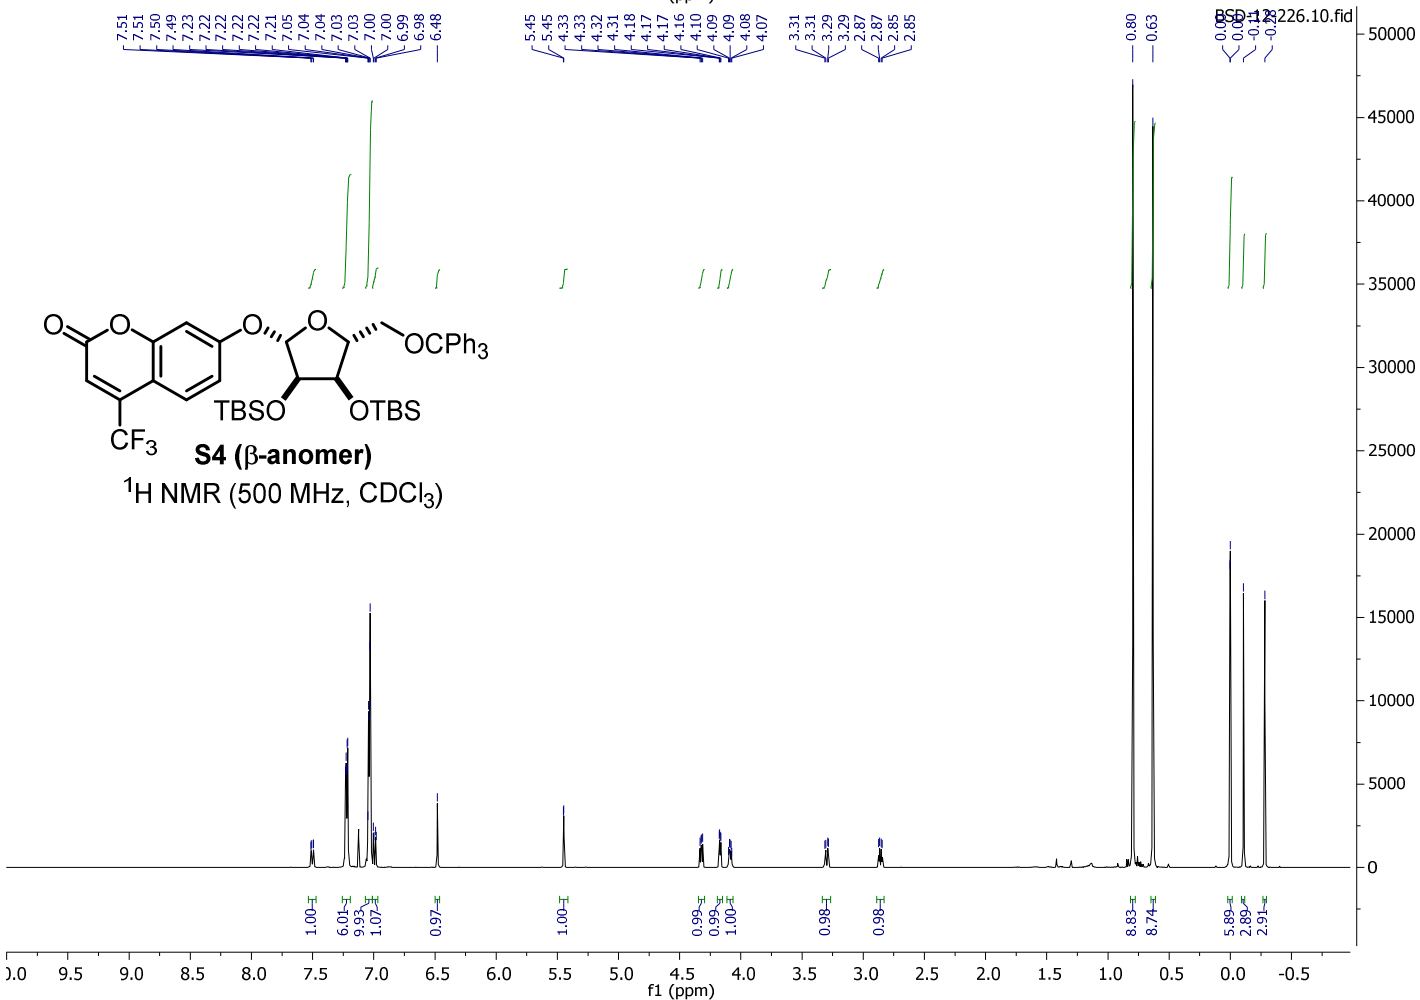



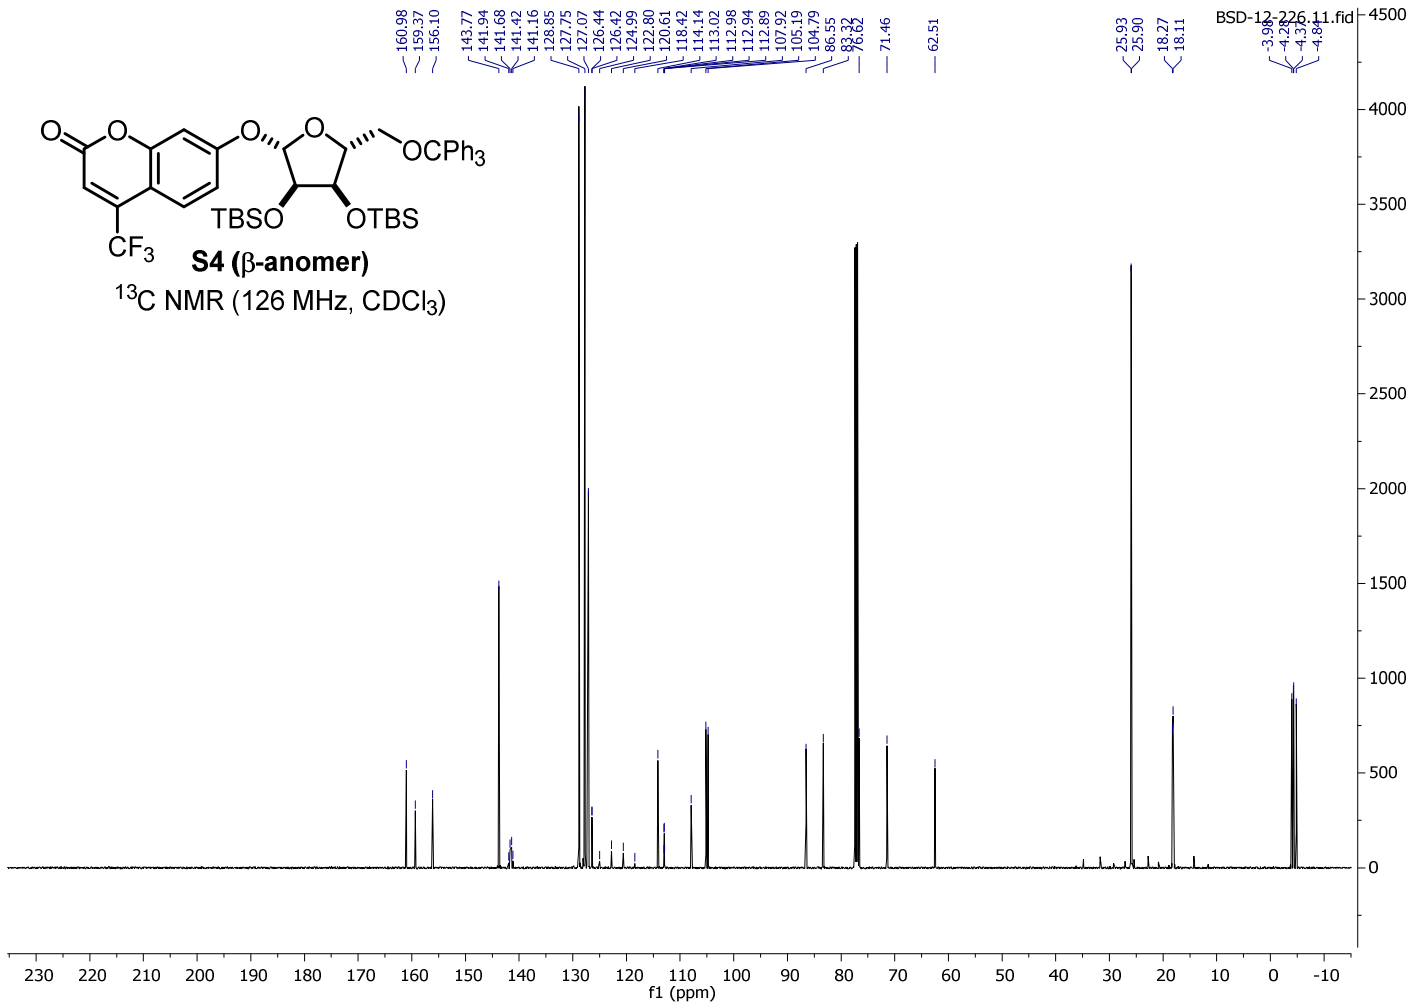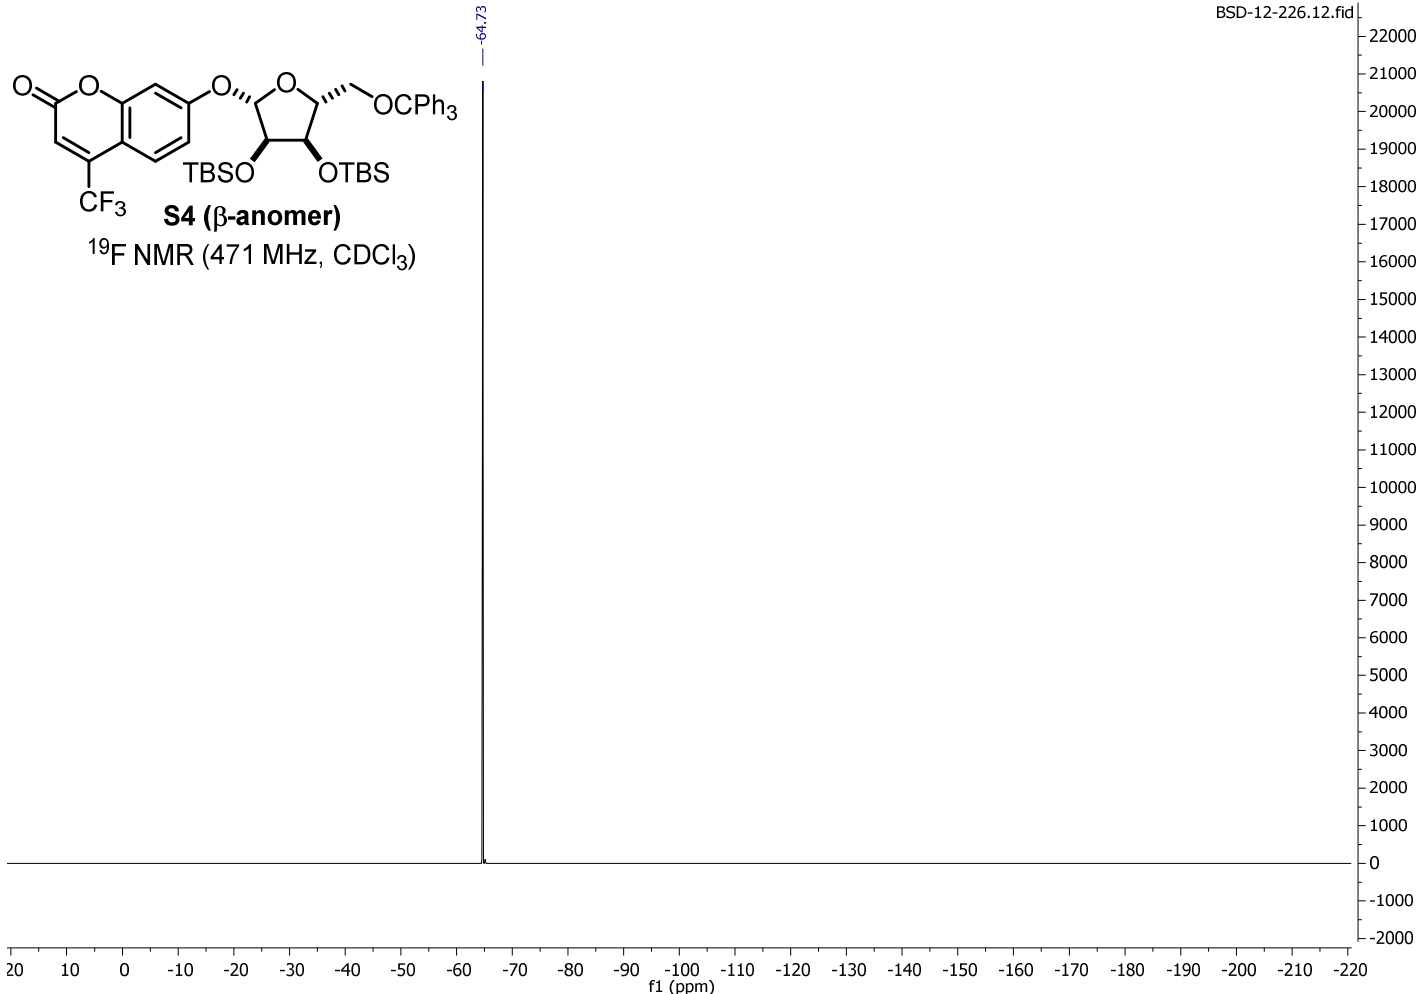

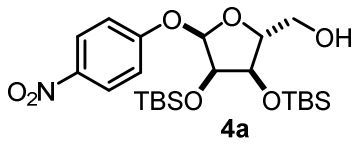

<sup>1</sup>H NMR (500 MHz, CDCl<sub>3</sub>)

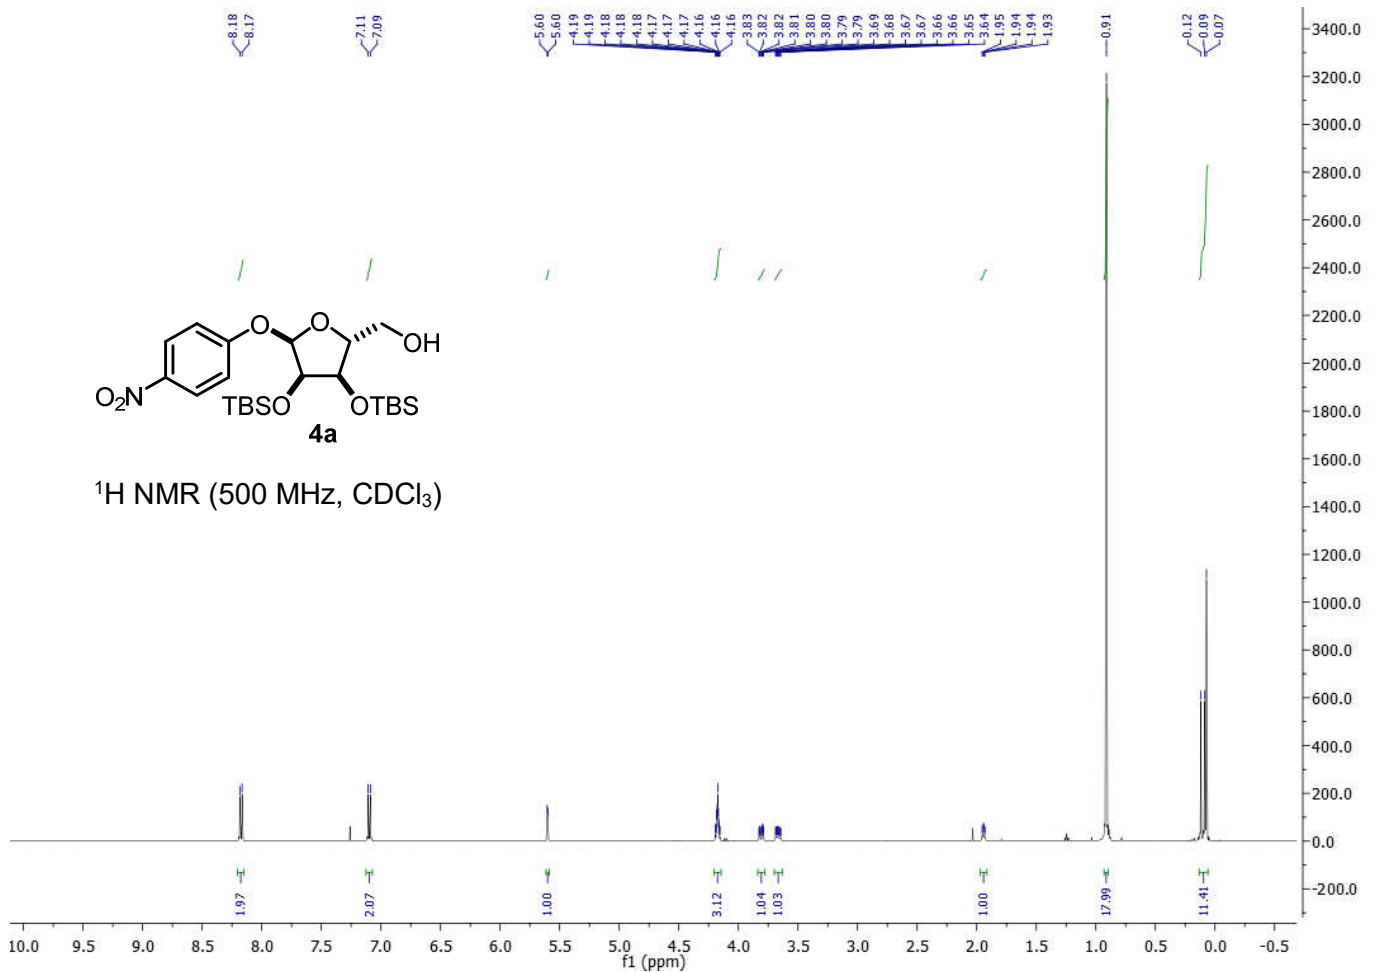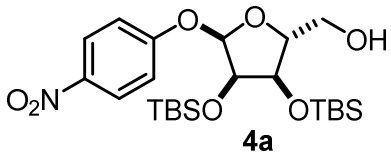

<sup>13</sup>C NMR (126 MHz, CDCl<sub>3</sub>)

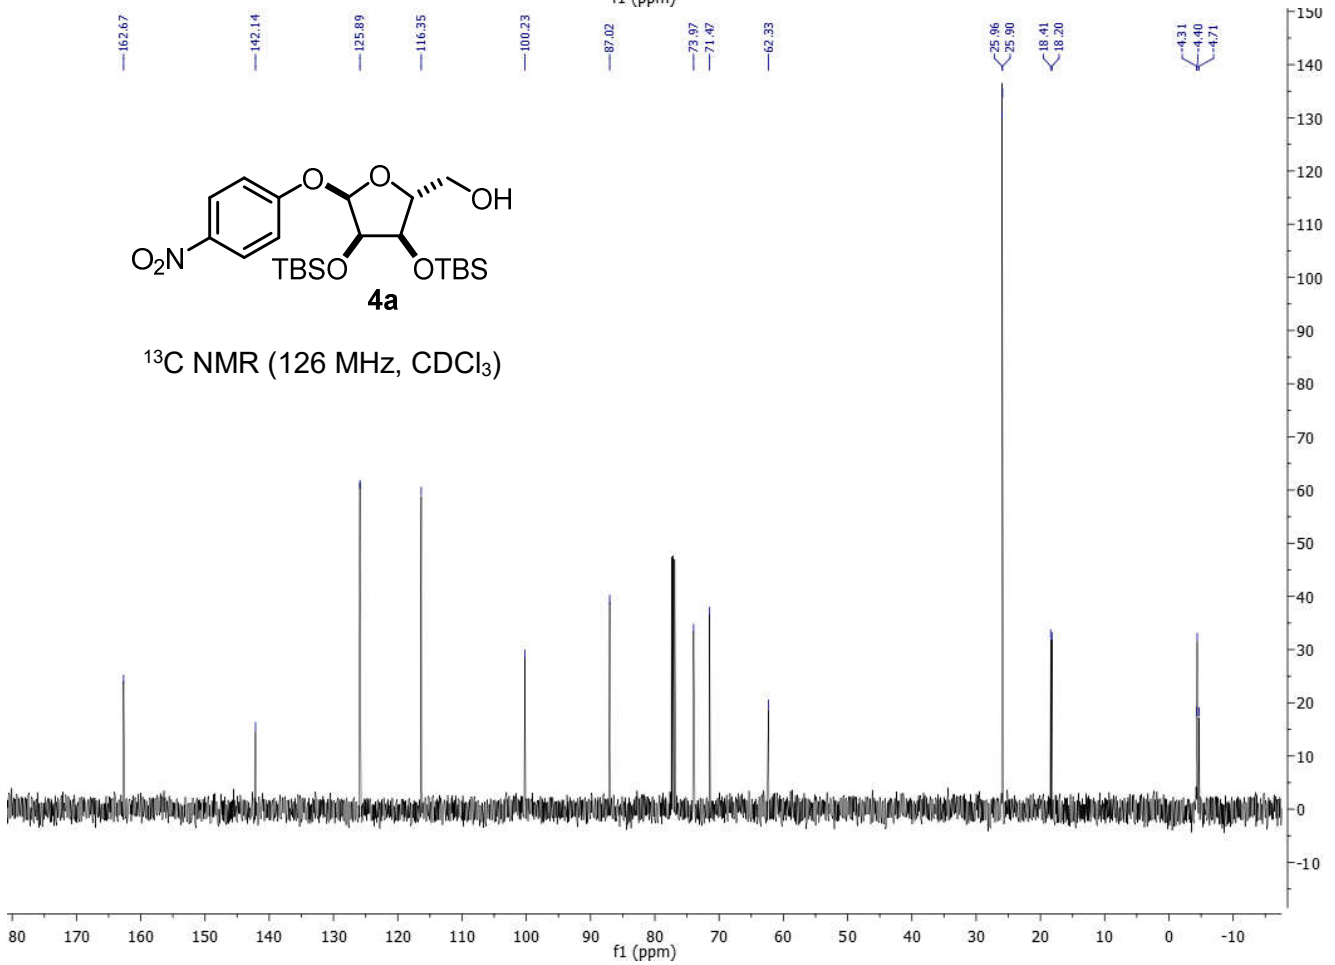

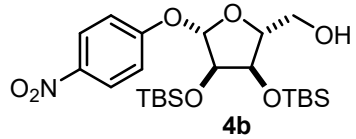

<sup>1</sup>H NMR (500 MHz, CDCl<sub>3</sub>)

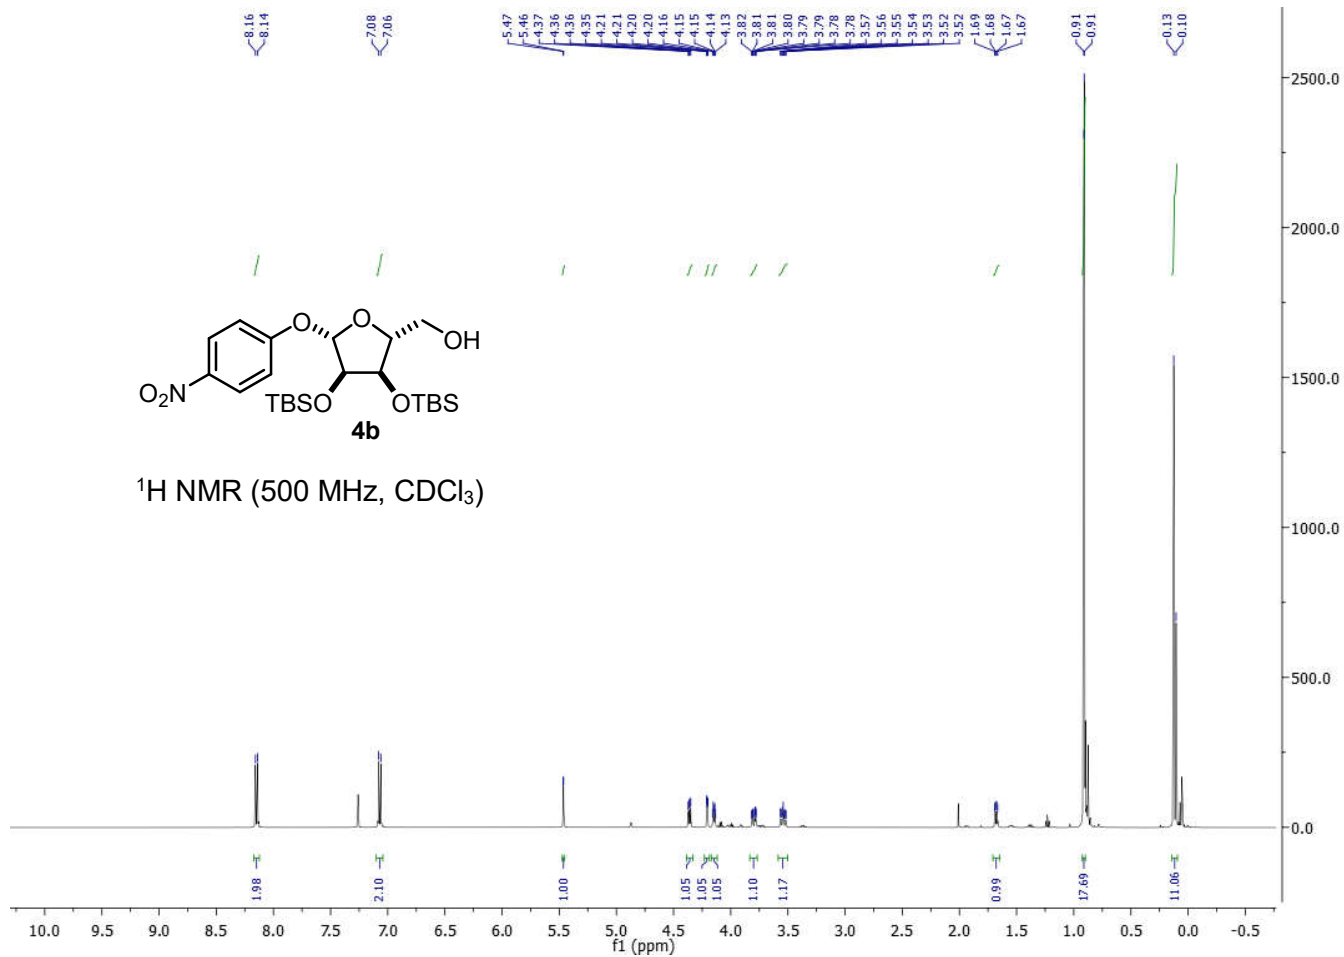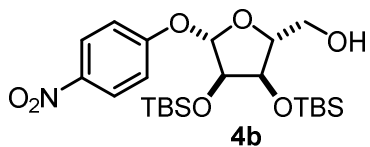

<sup>13</sup>C NMR (126 MHz, CDCl<sub>3</sub>)

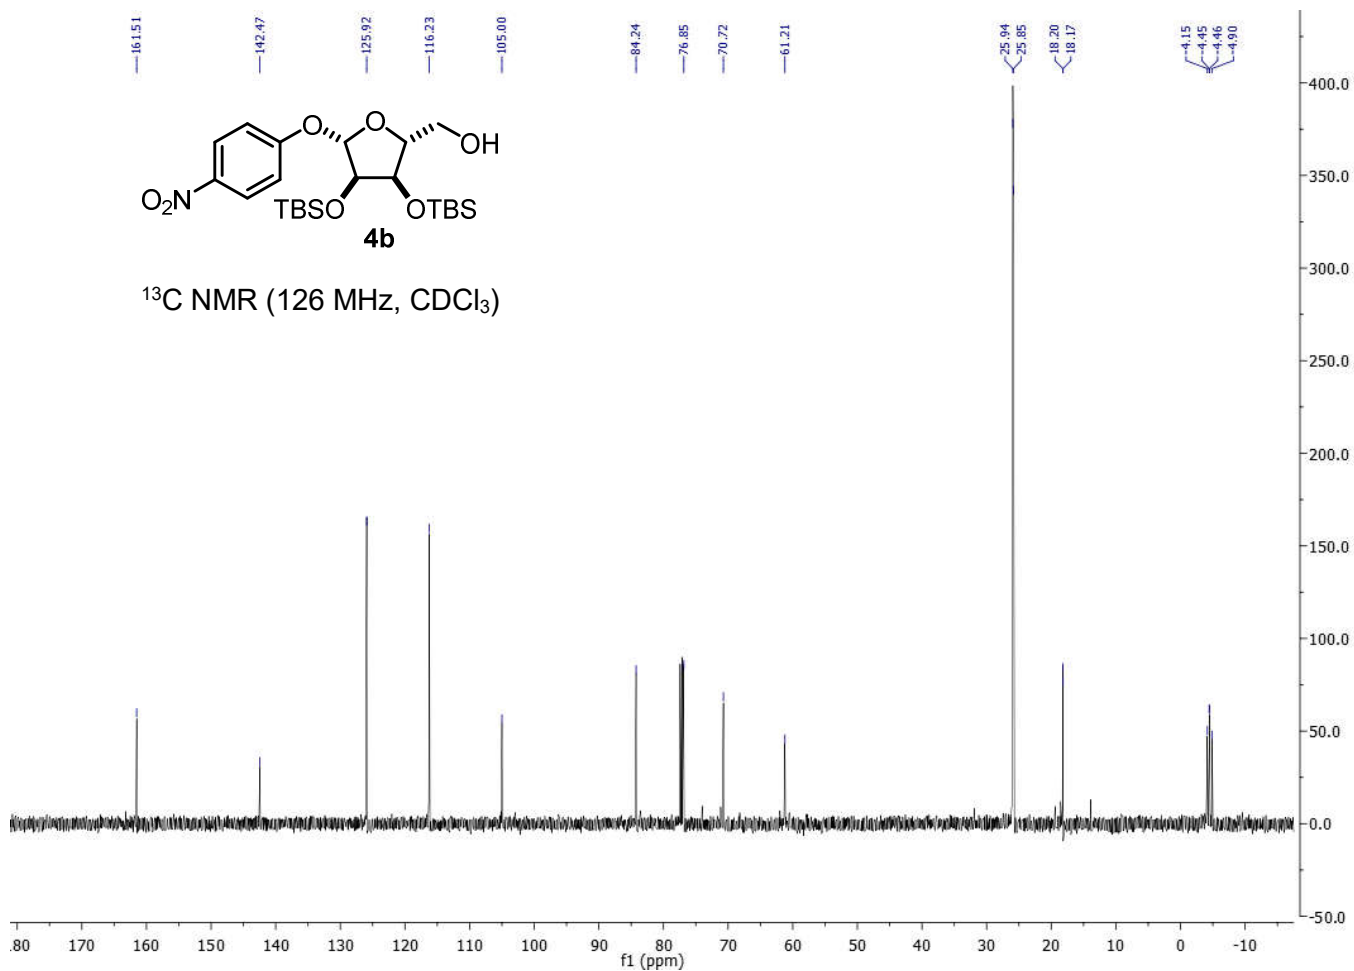

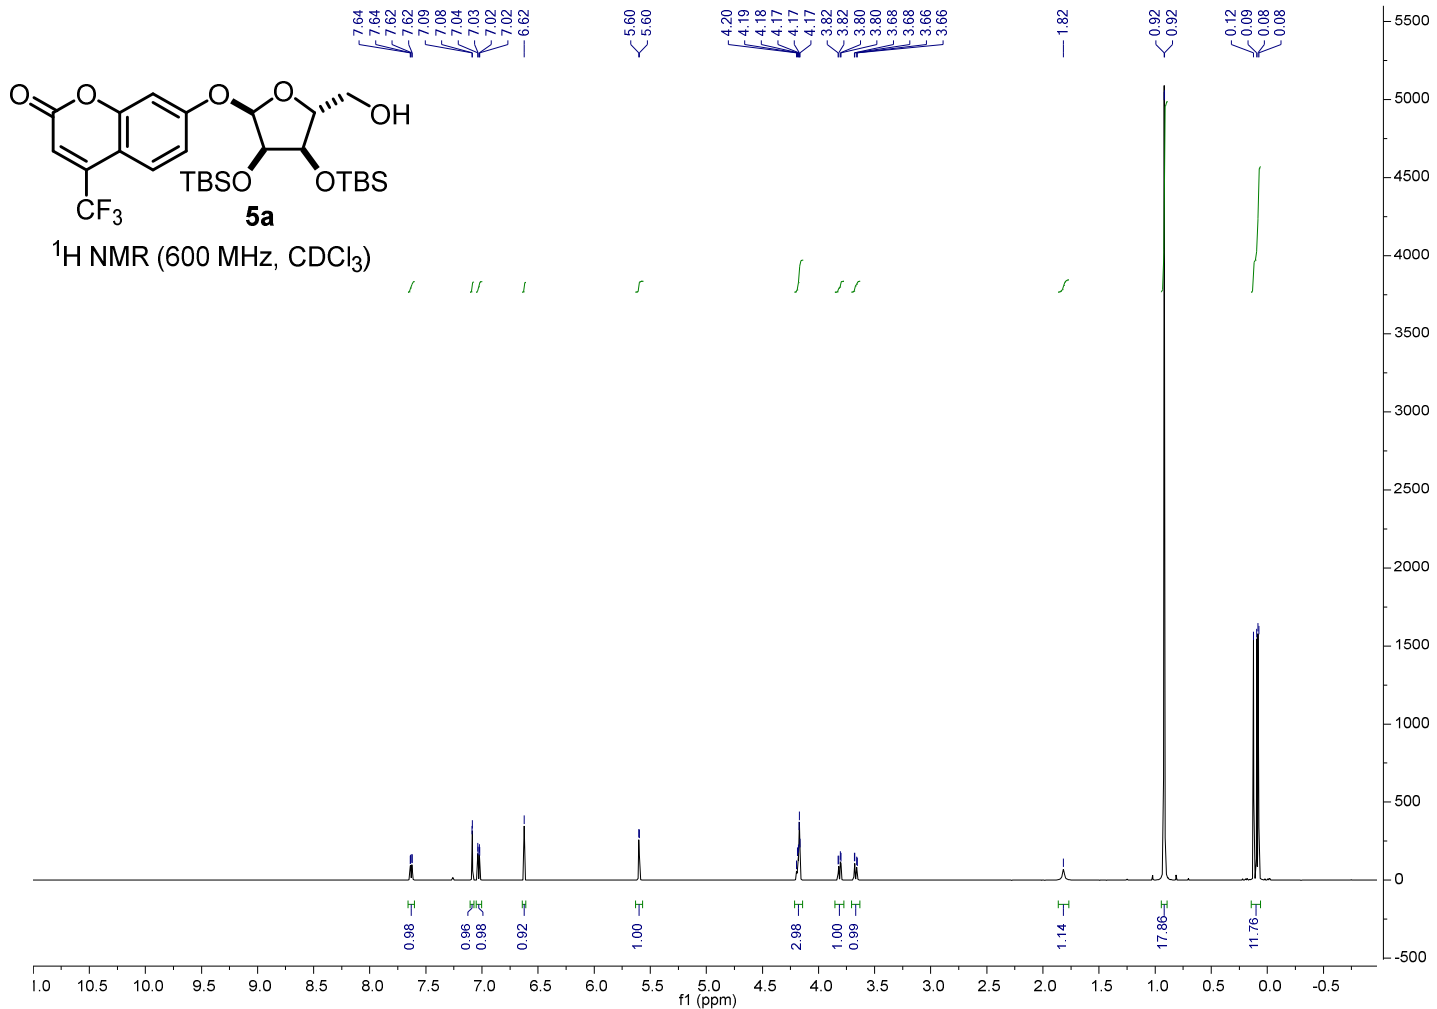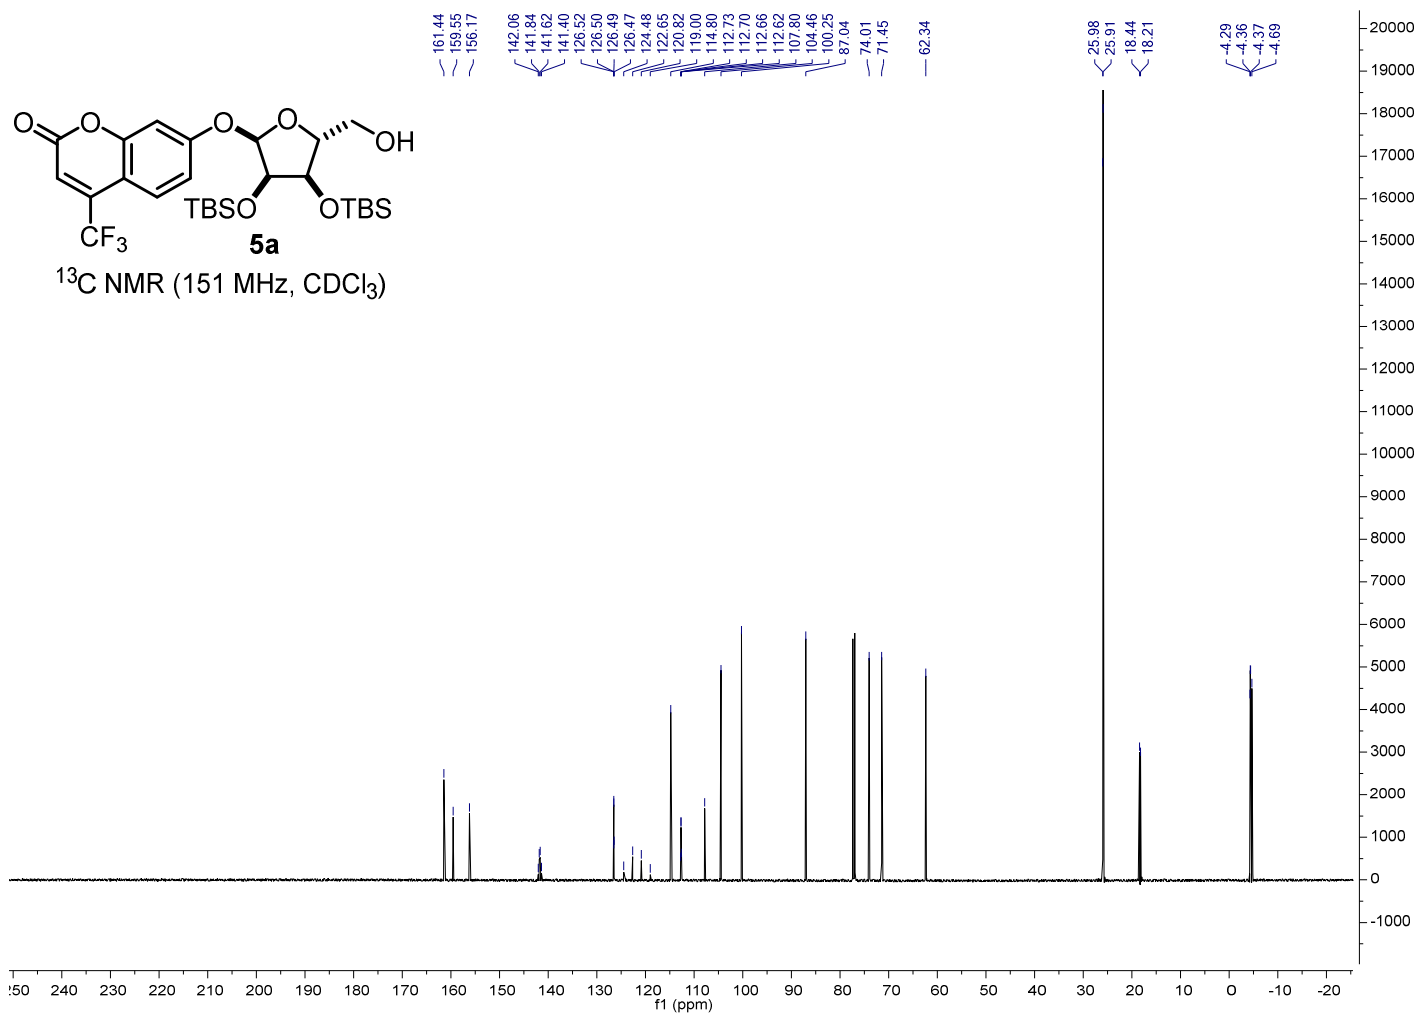

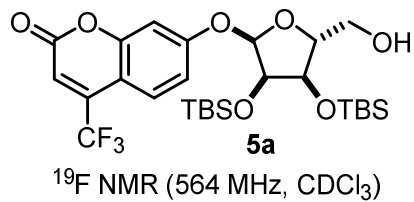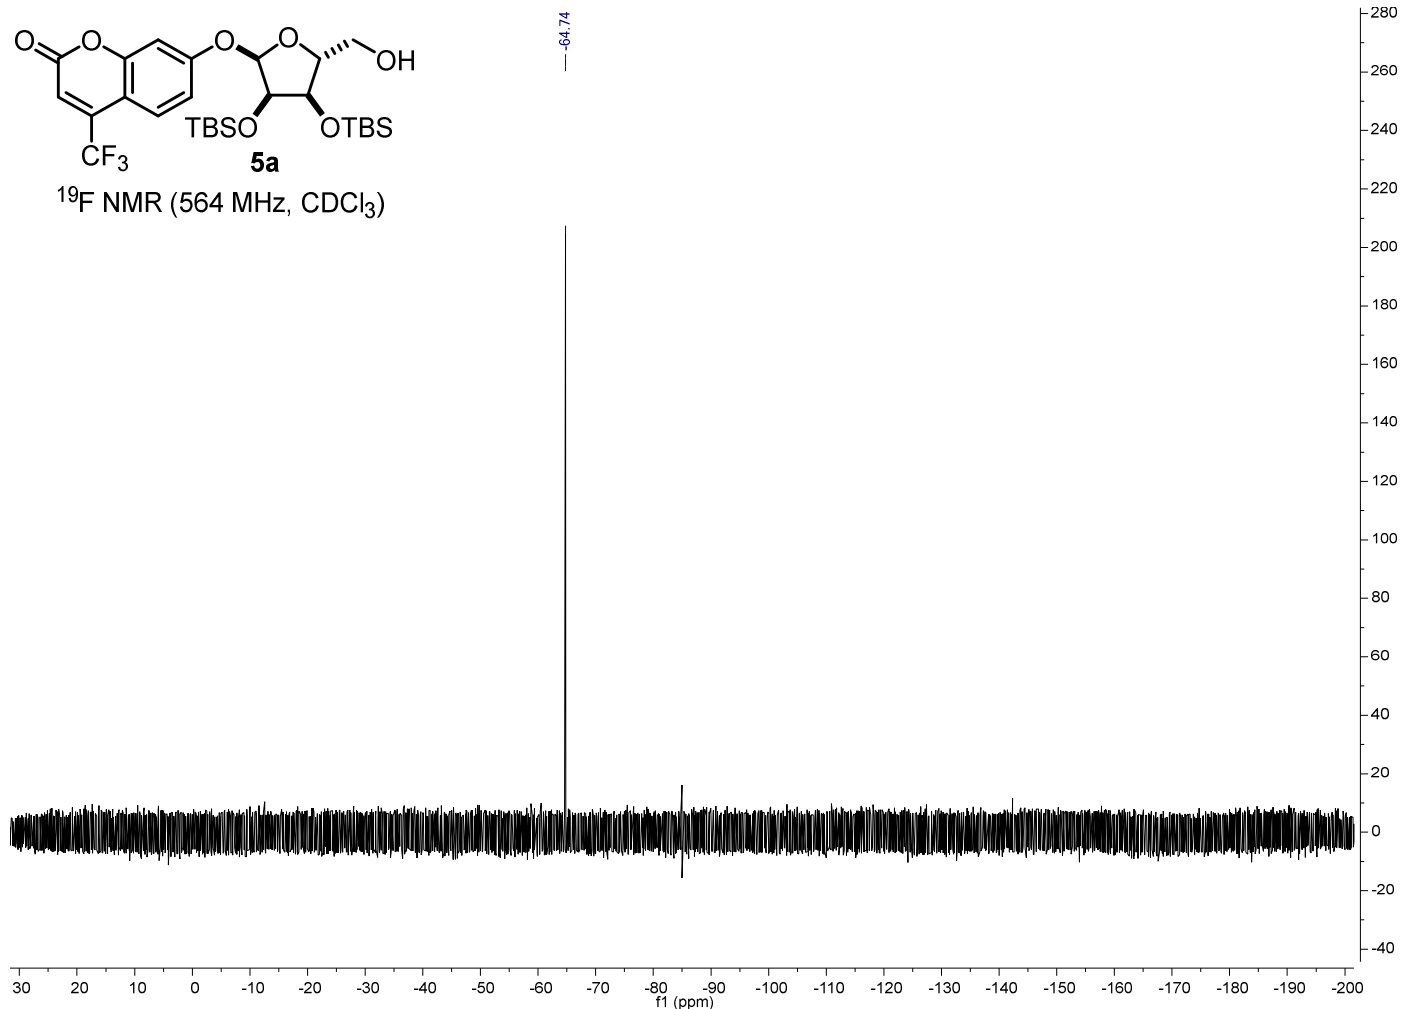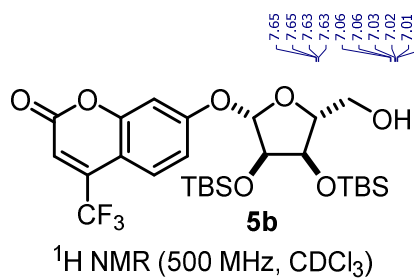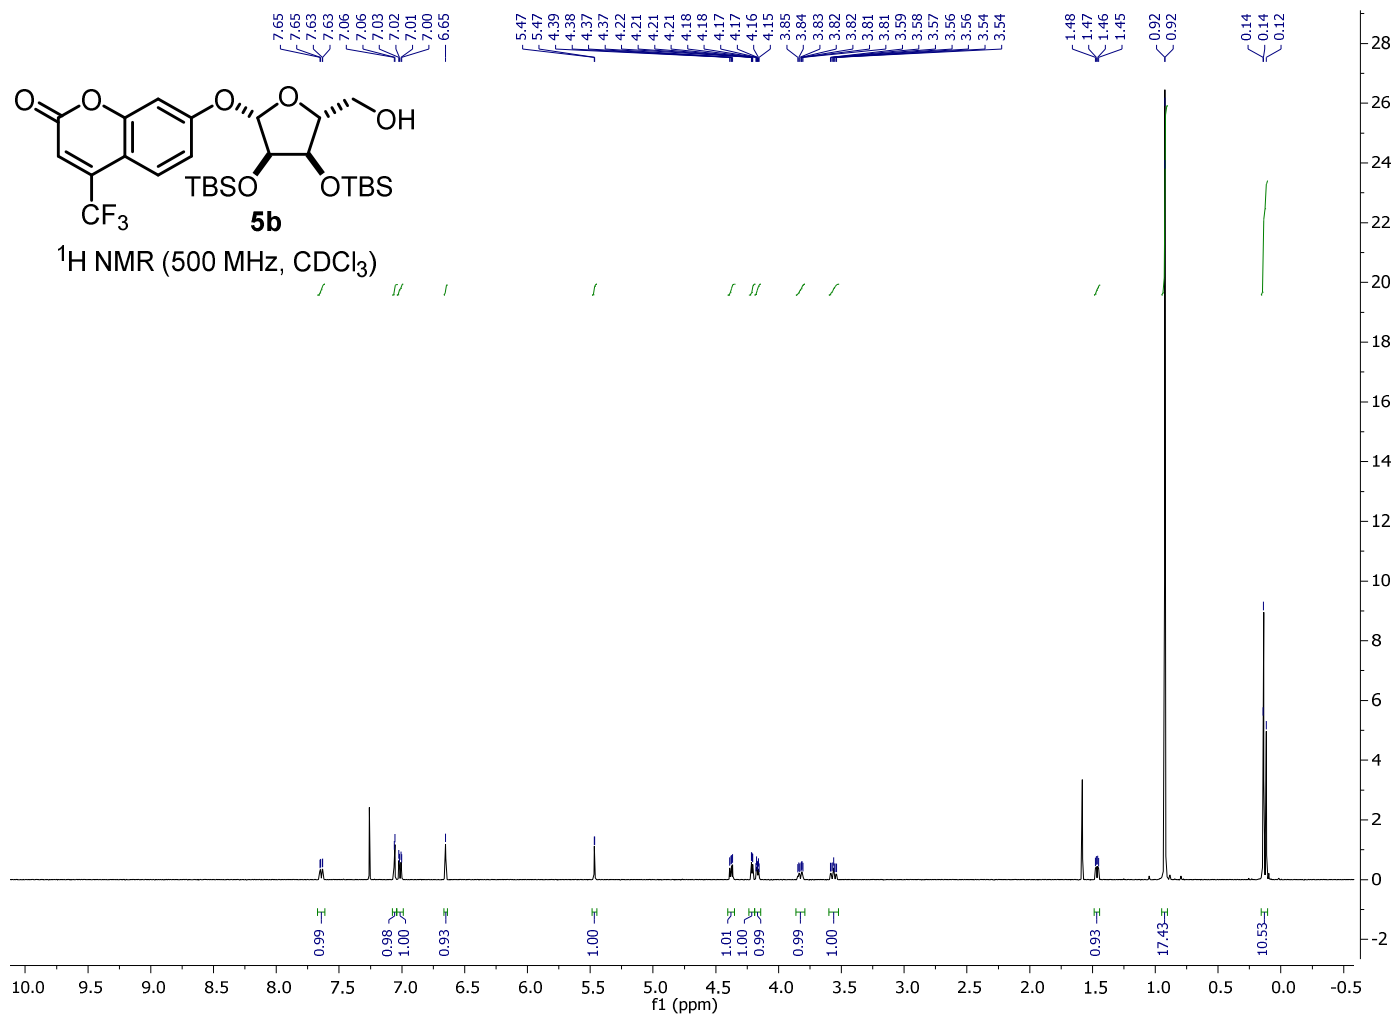

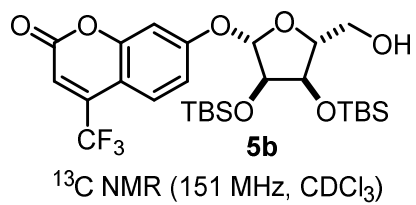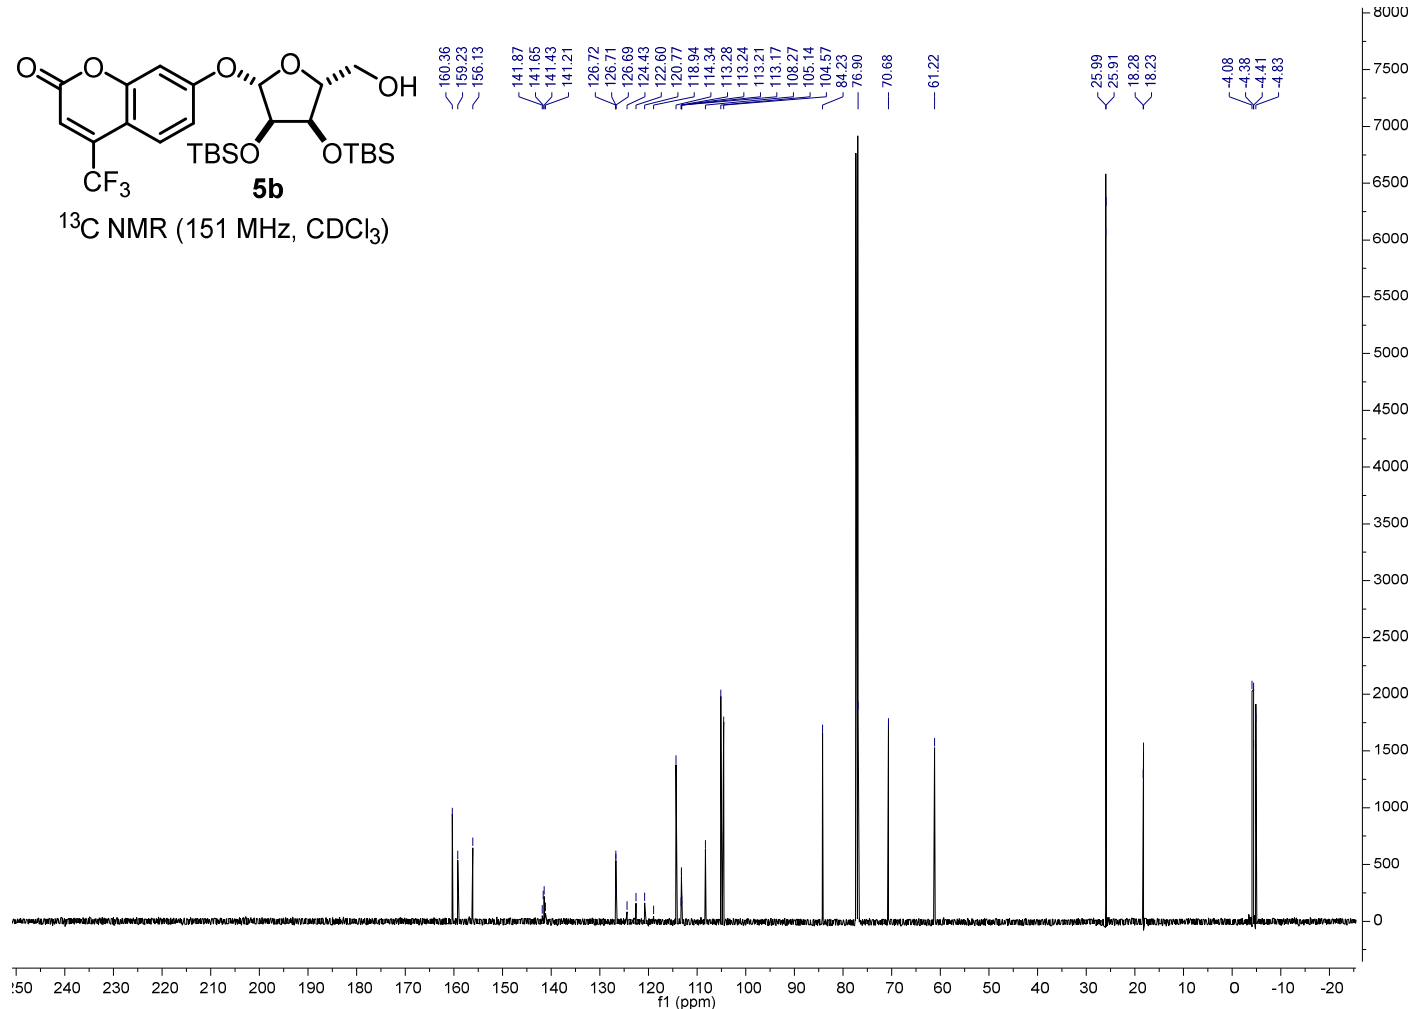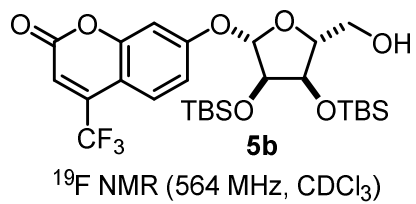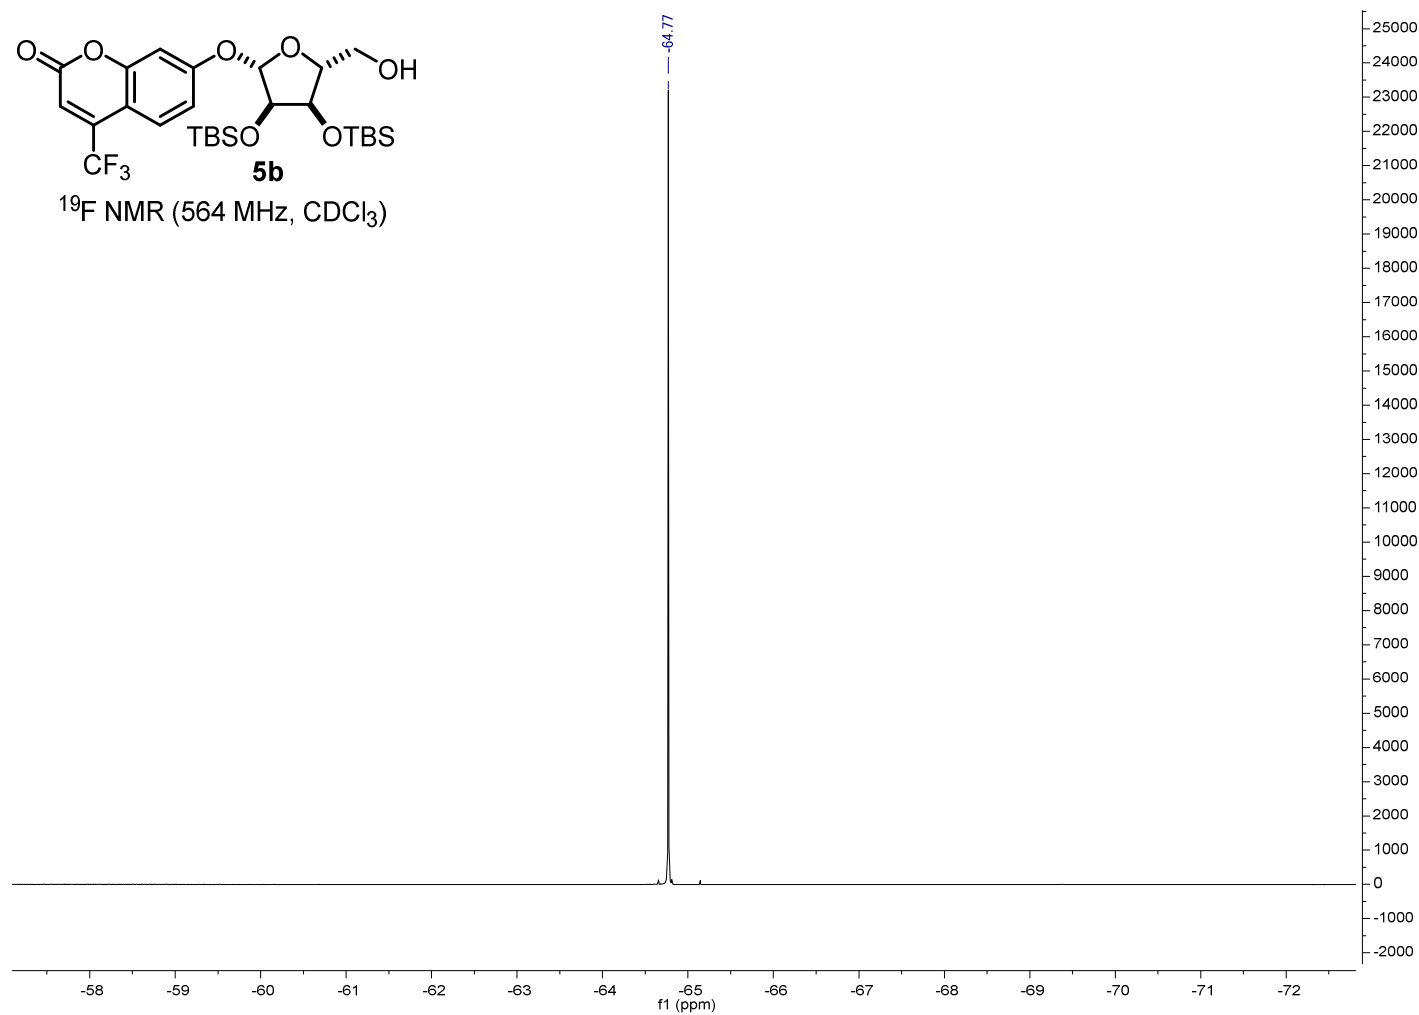

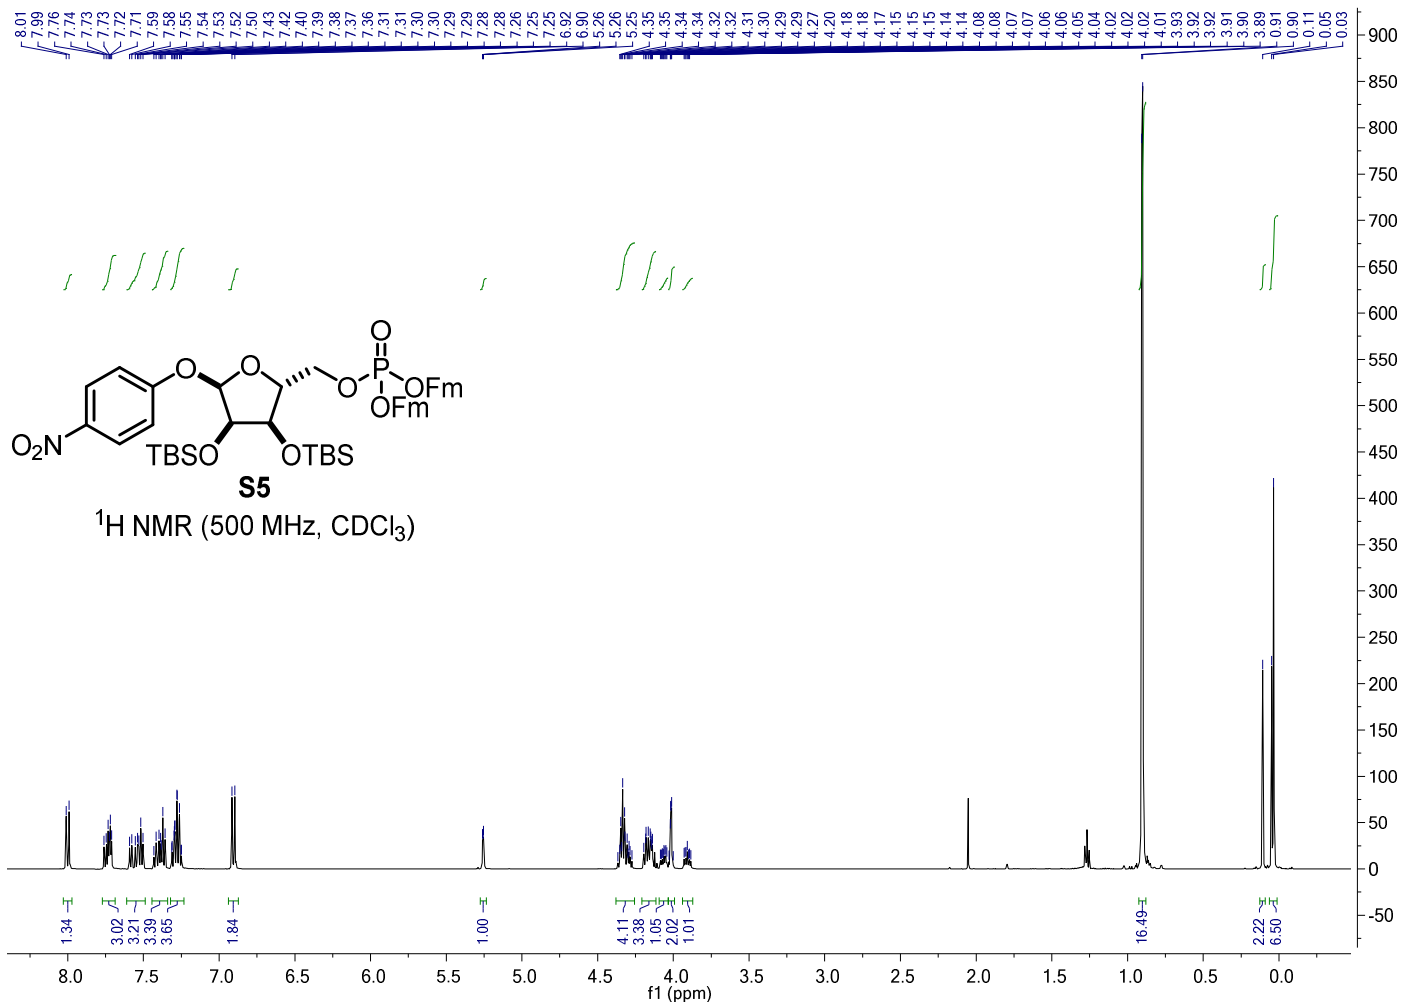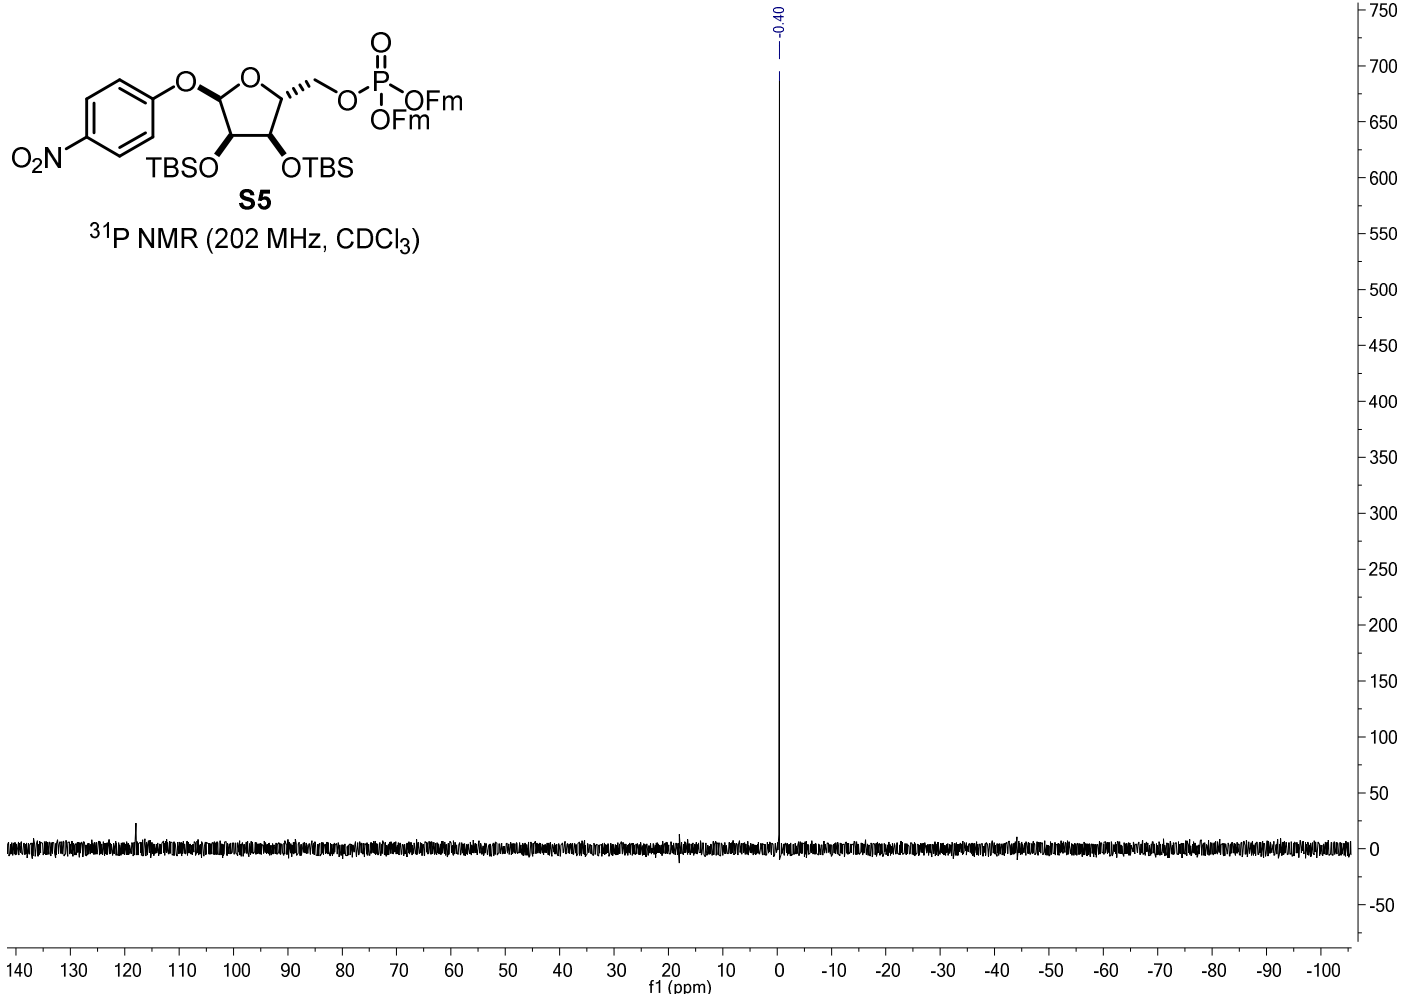

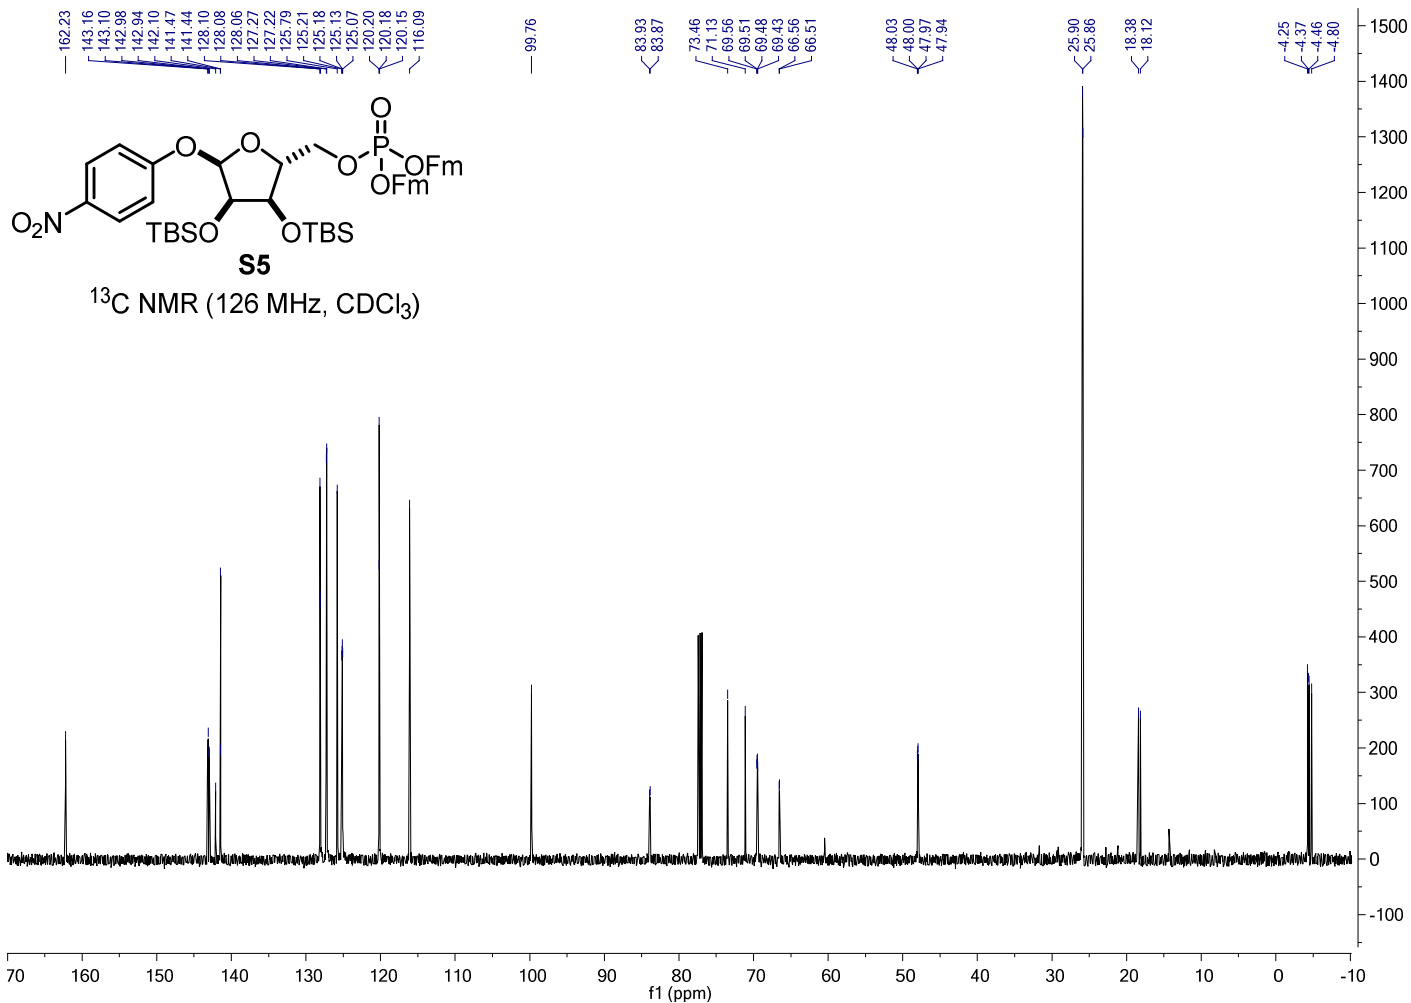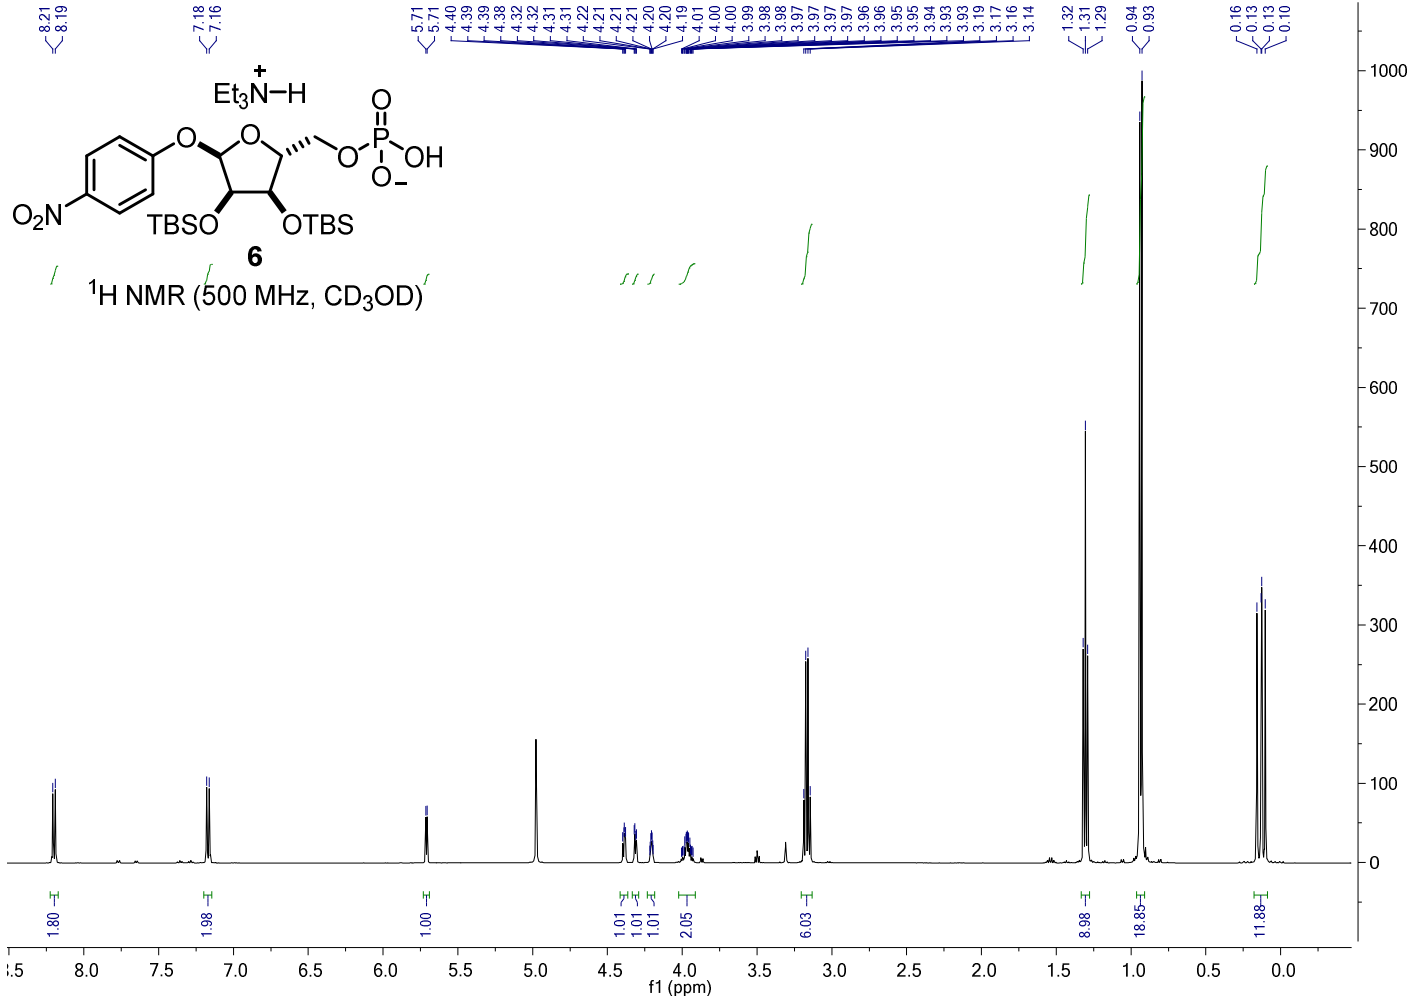



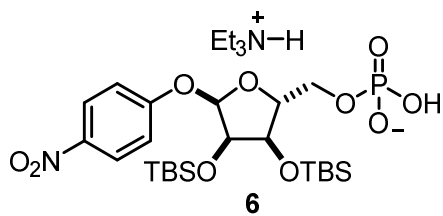

$^{31}\text{P}$  NMR (202 MHz,  $\text{CD}_3\text{OD}$ )

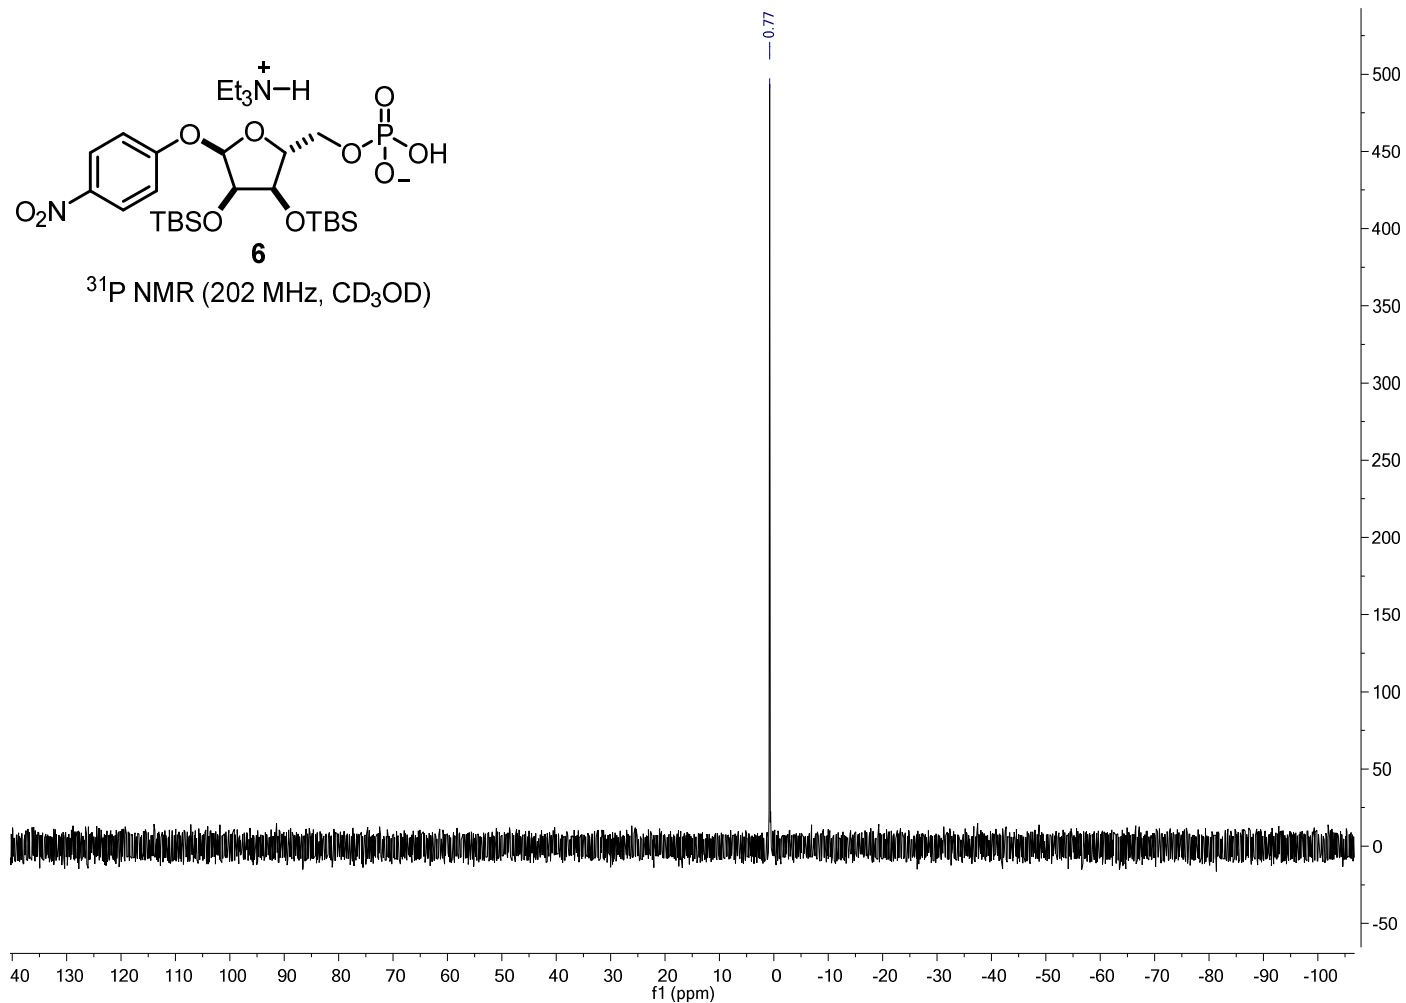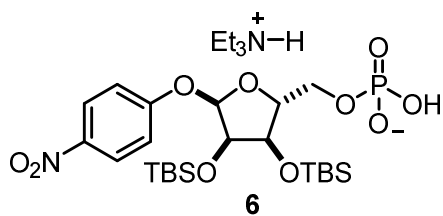

$^{13}\text{C}$  NMR (126 MHz,  $\text{CD}_3\text{OD}$ )

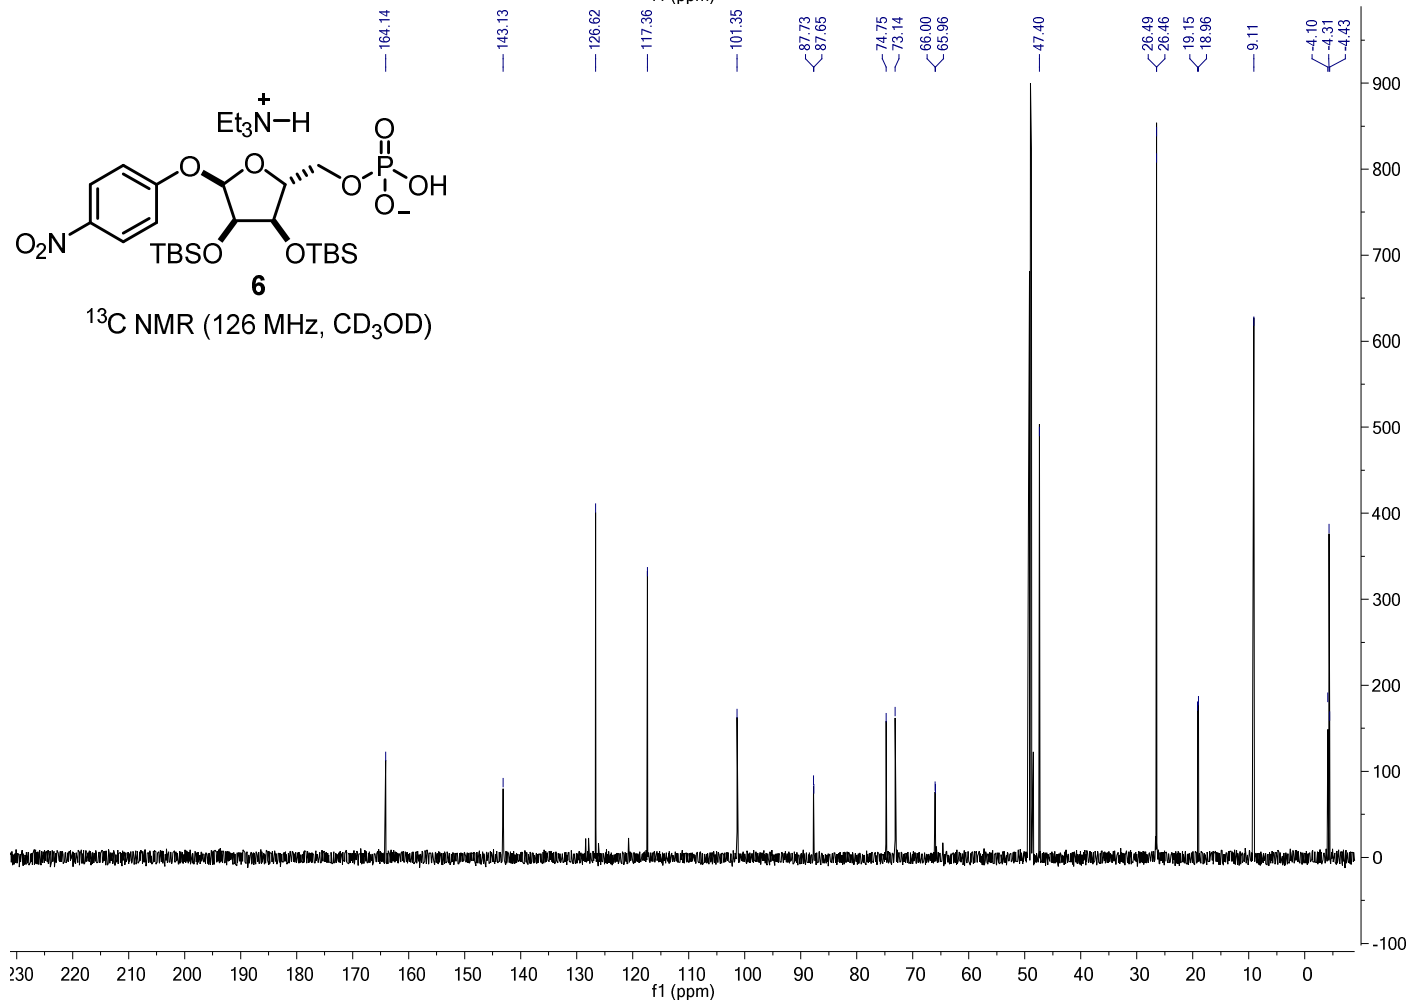

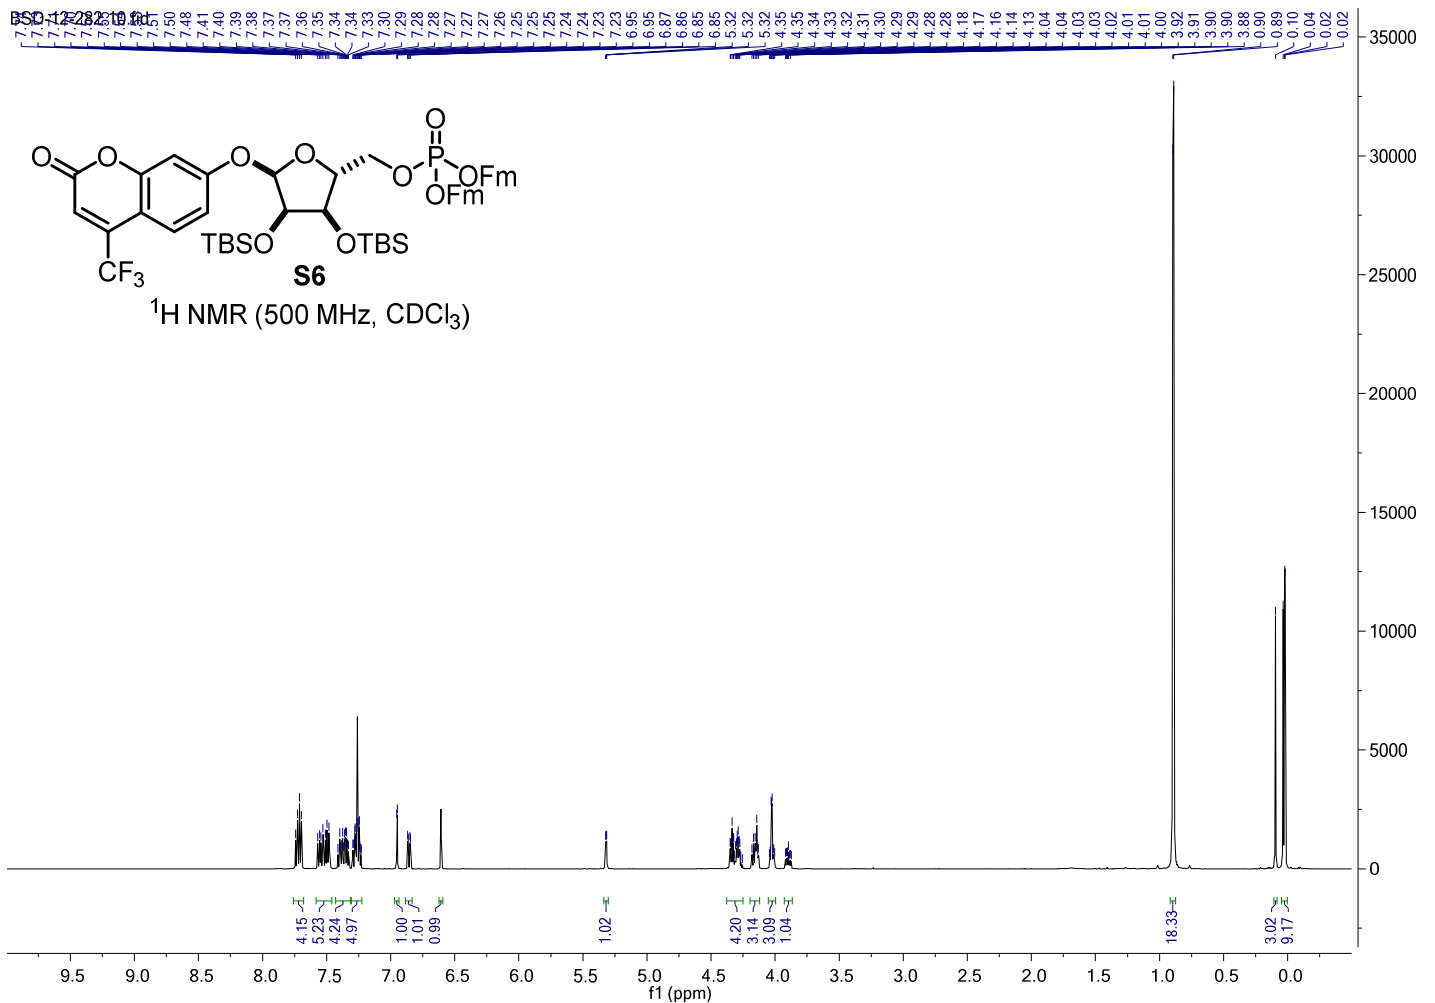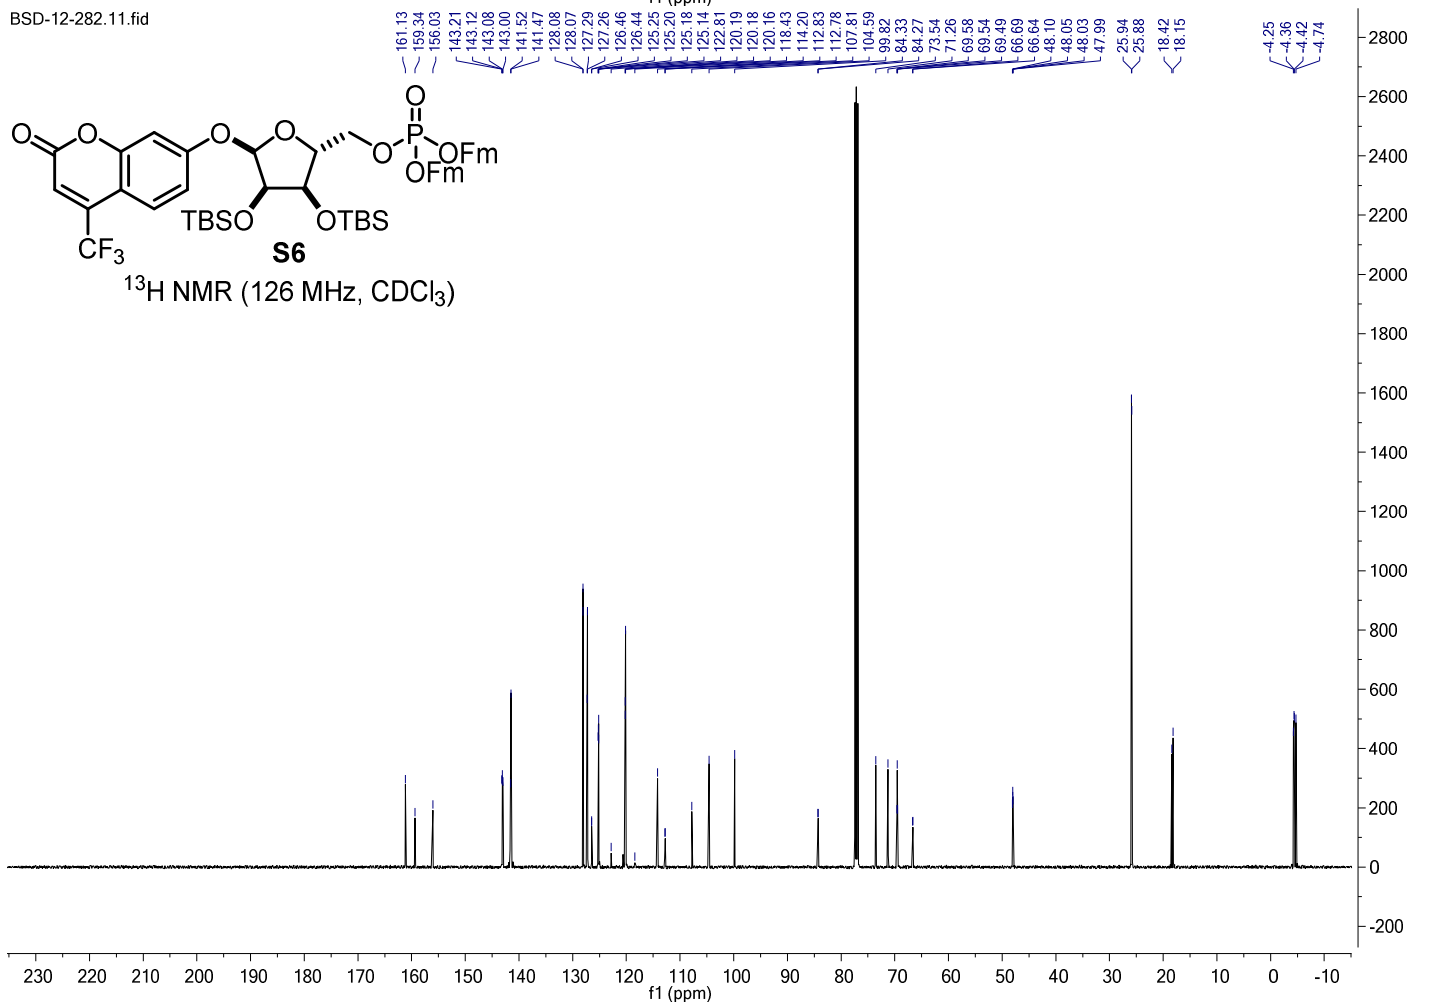

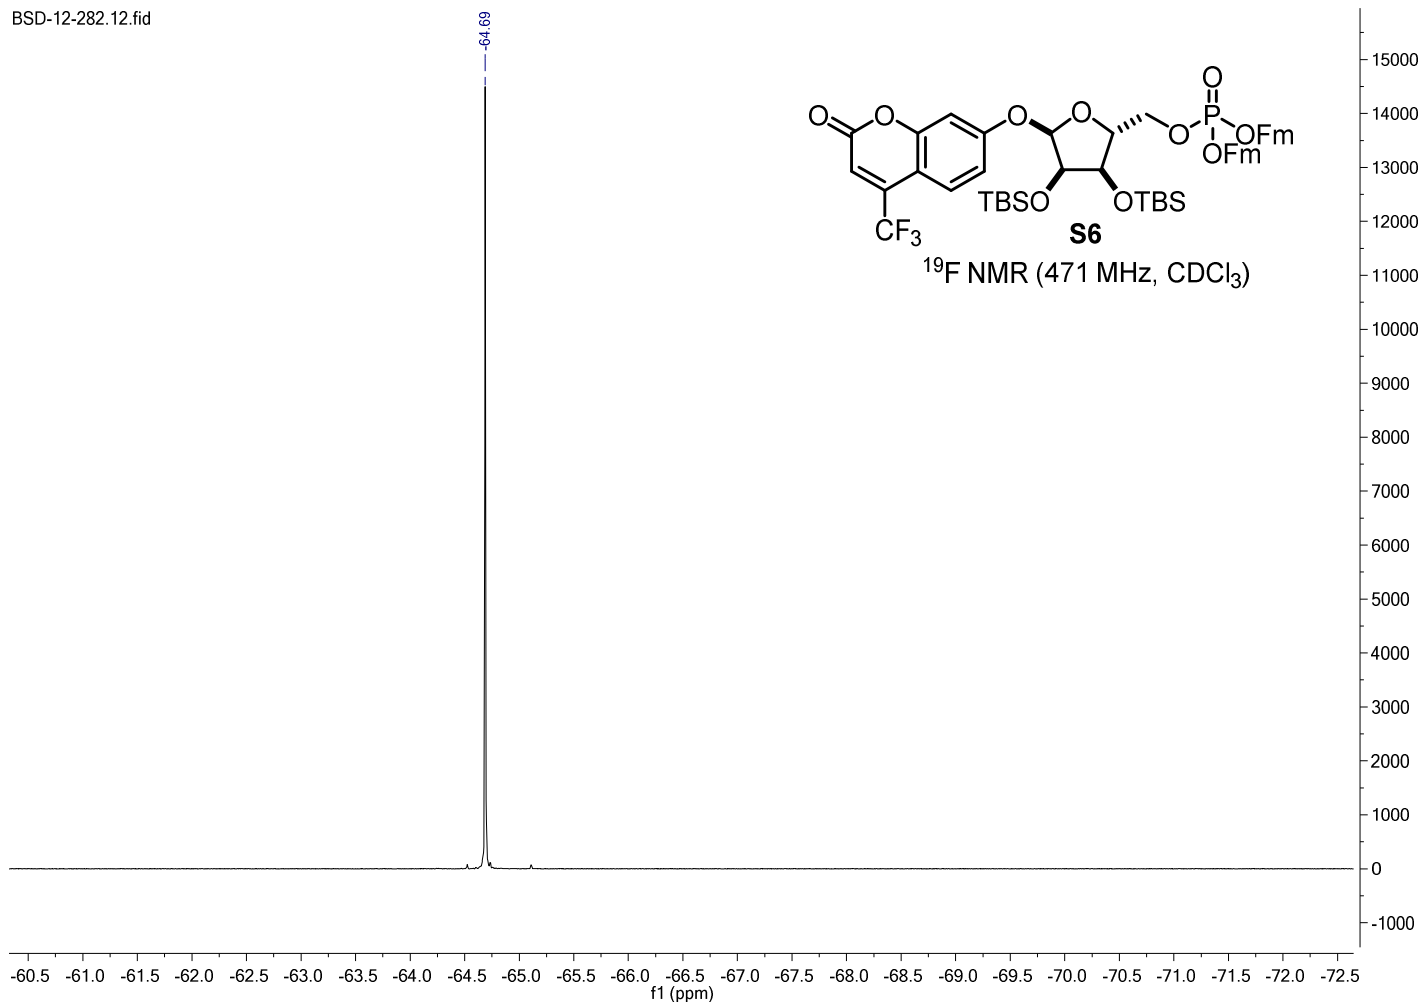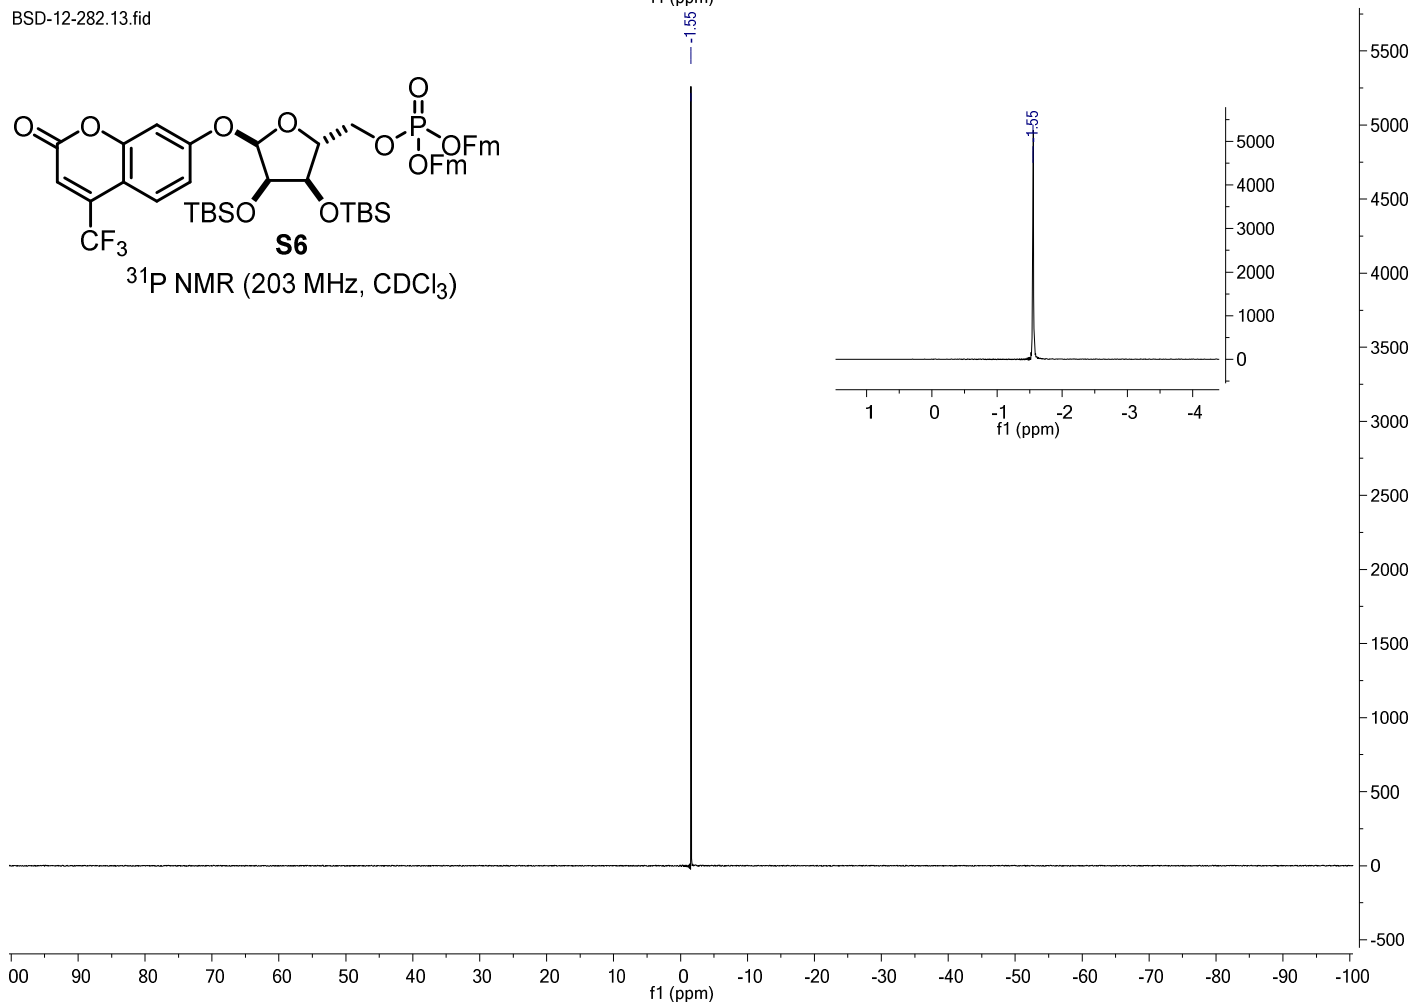

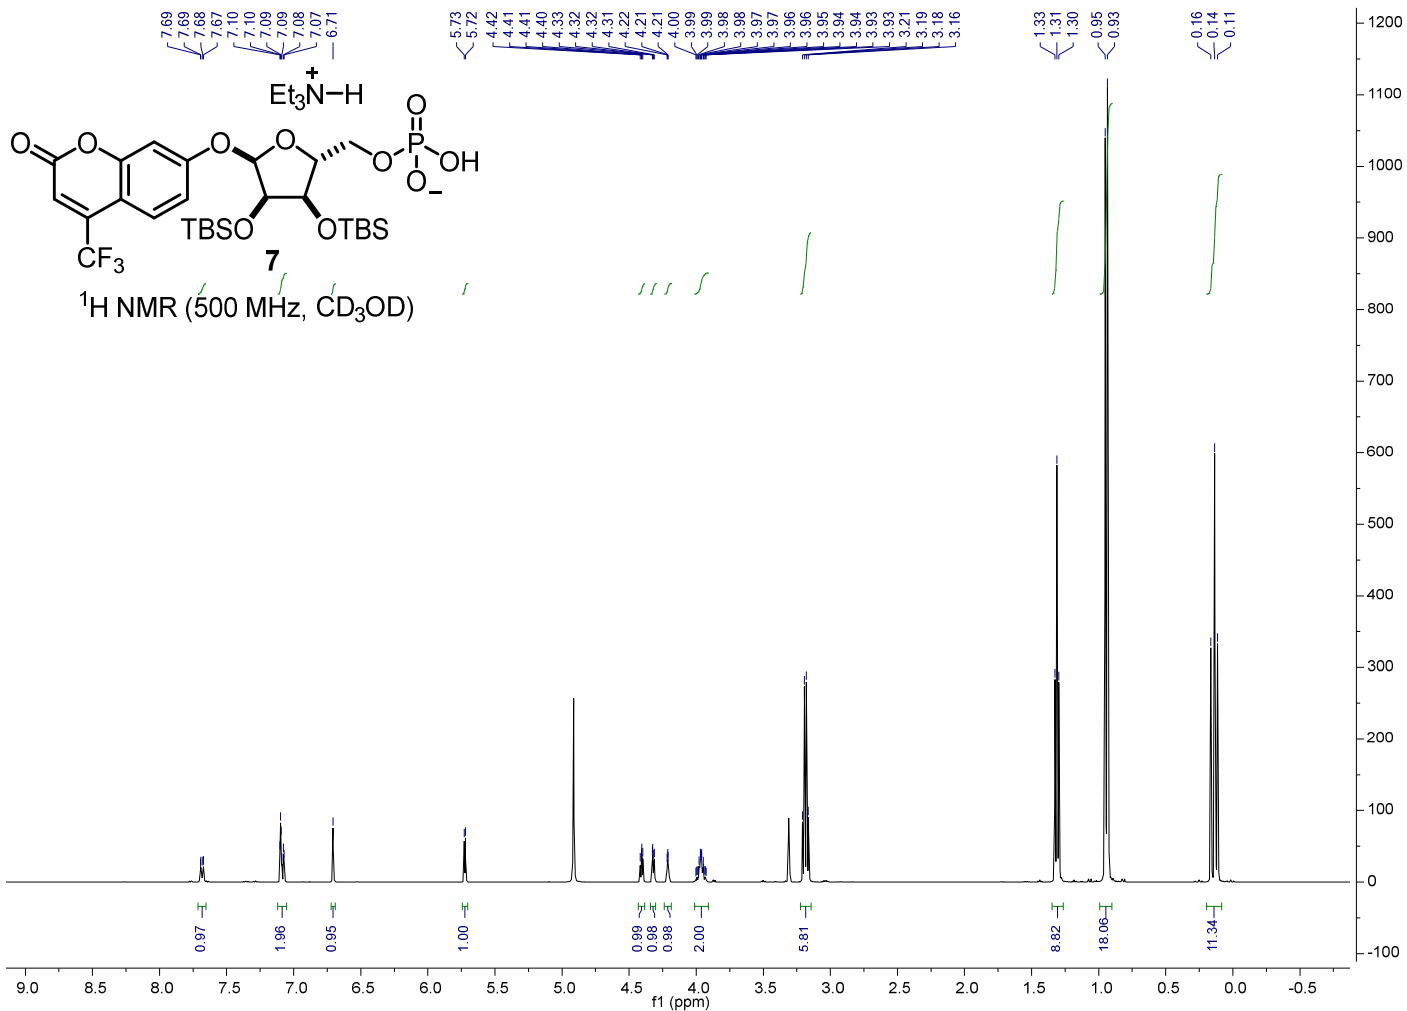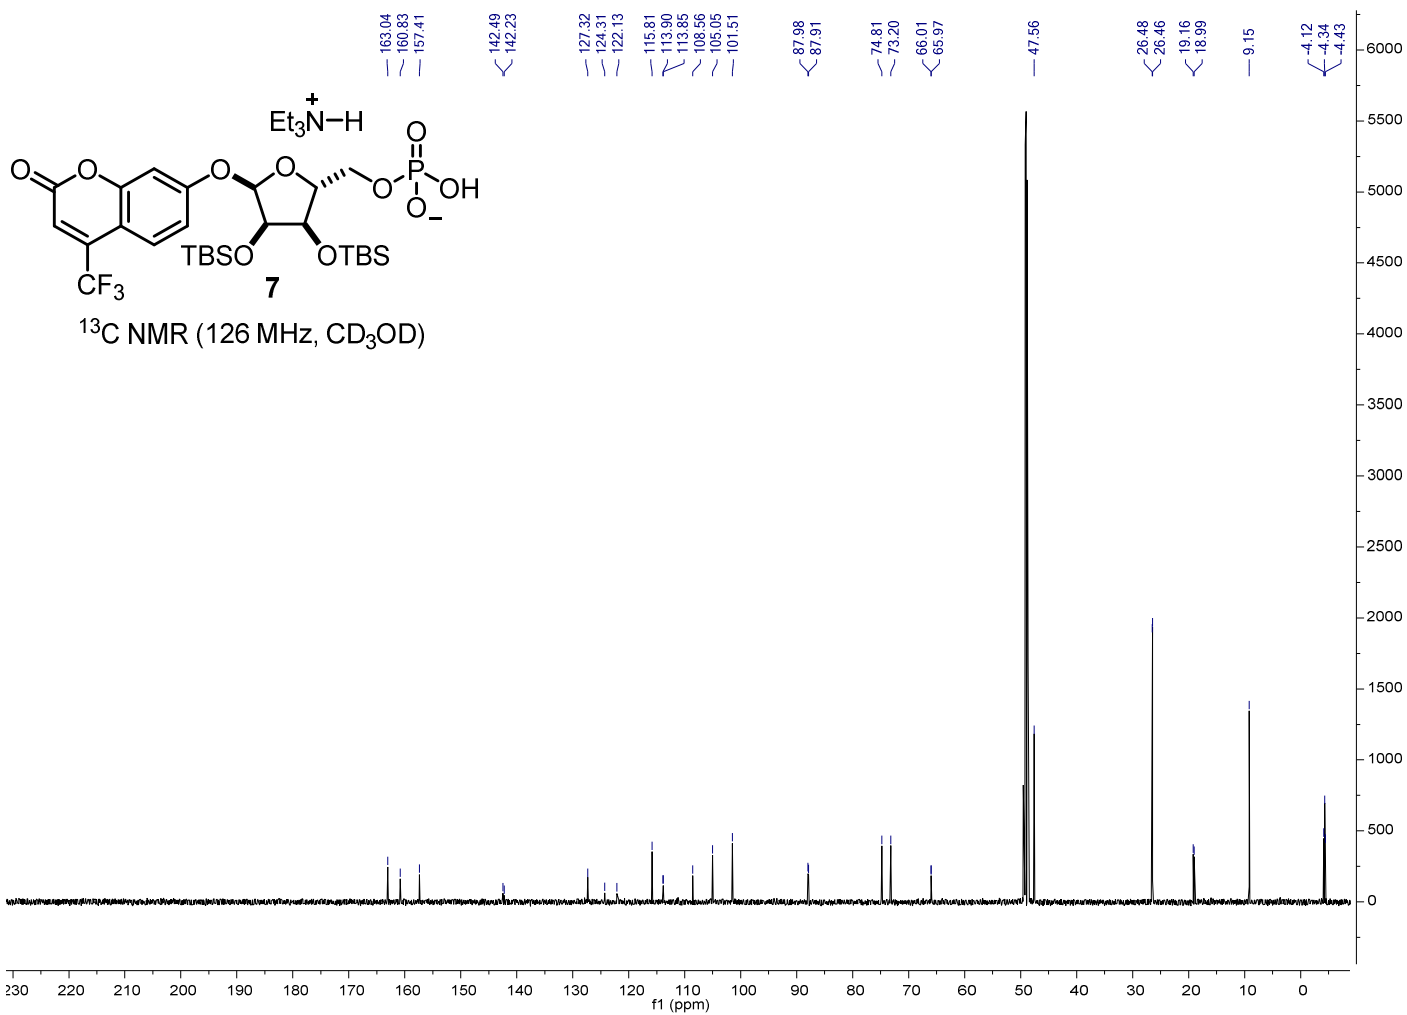

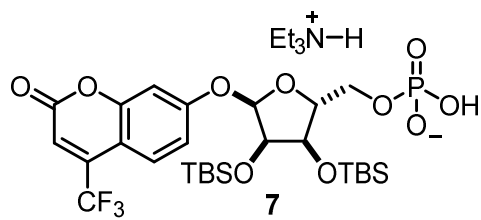

$^{19}\text{F}$  NMR (470 MHz,  $\text{CD}_3\text{OD}$ )

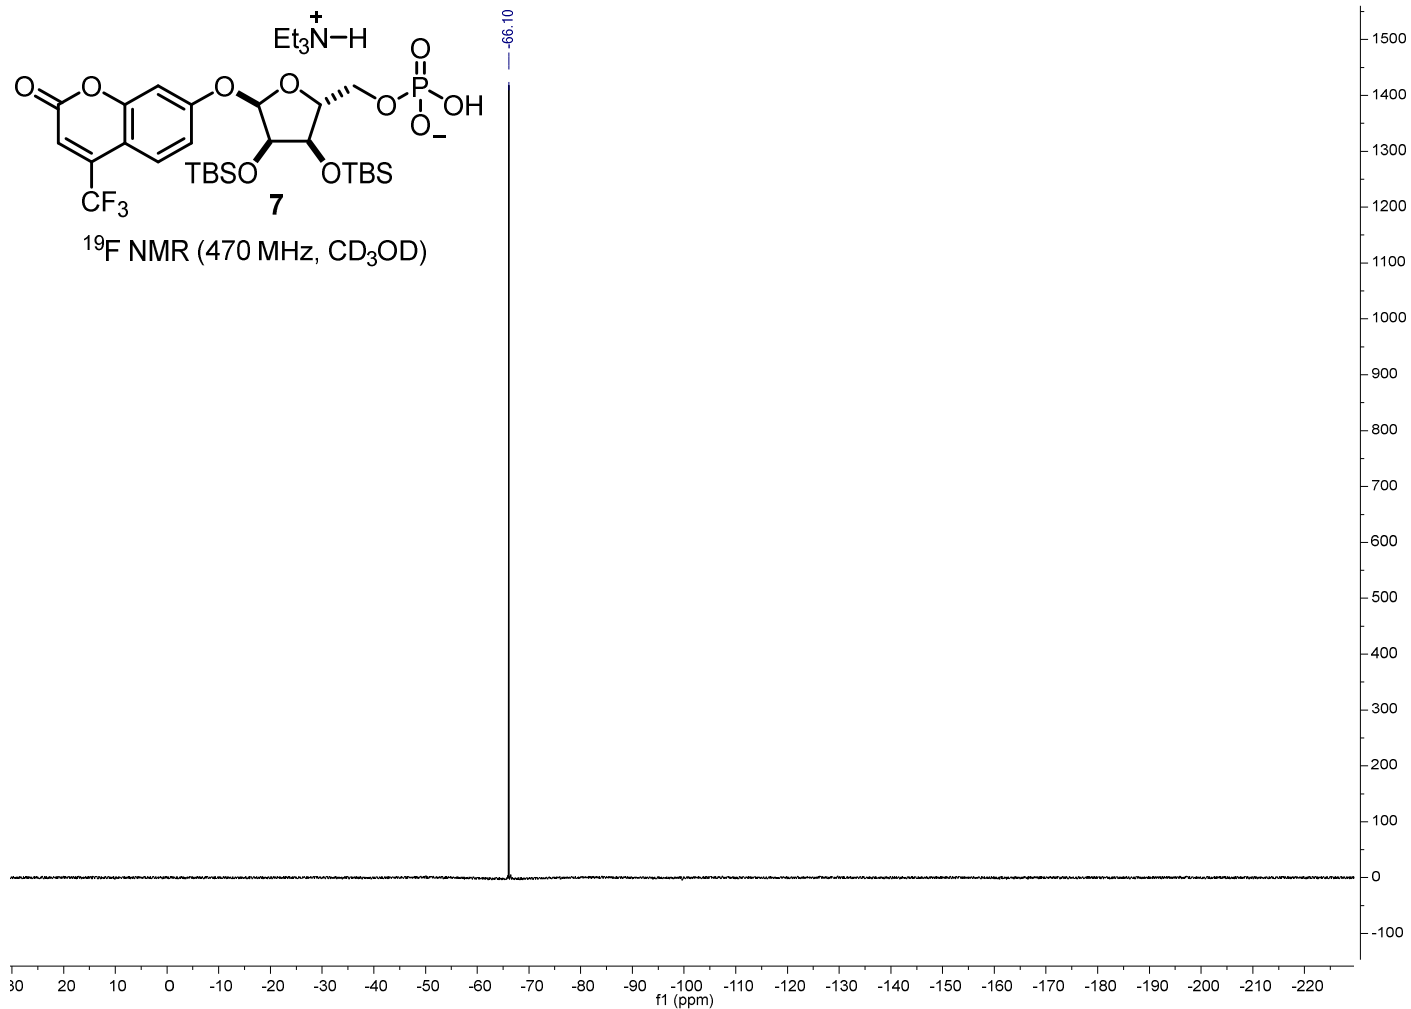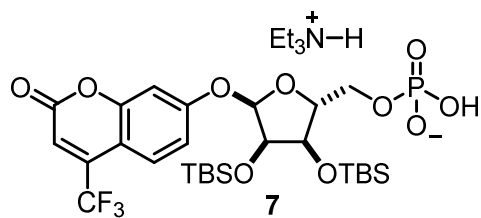

$^{31}\text{P}$  NMR (202 MHz,  $\text{CD}_3\text{OD}$ )

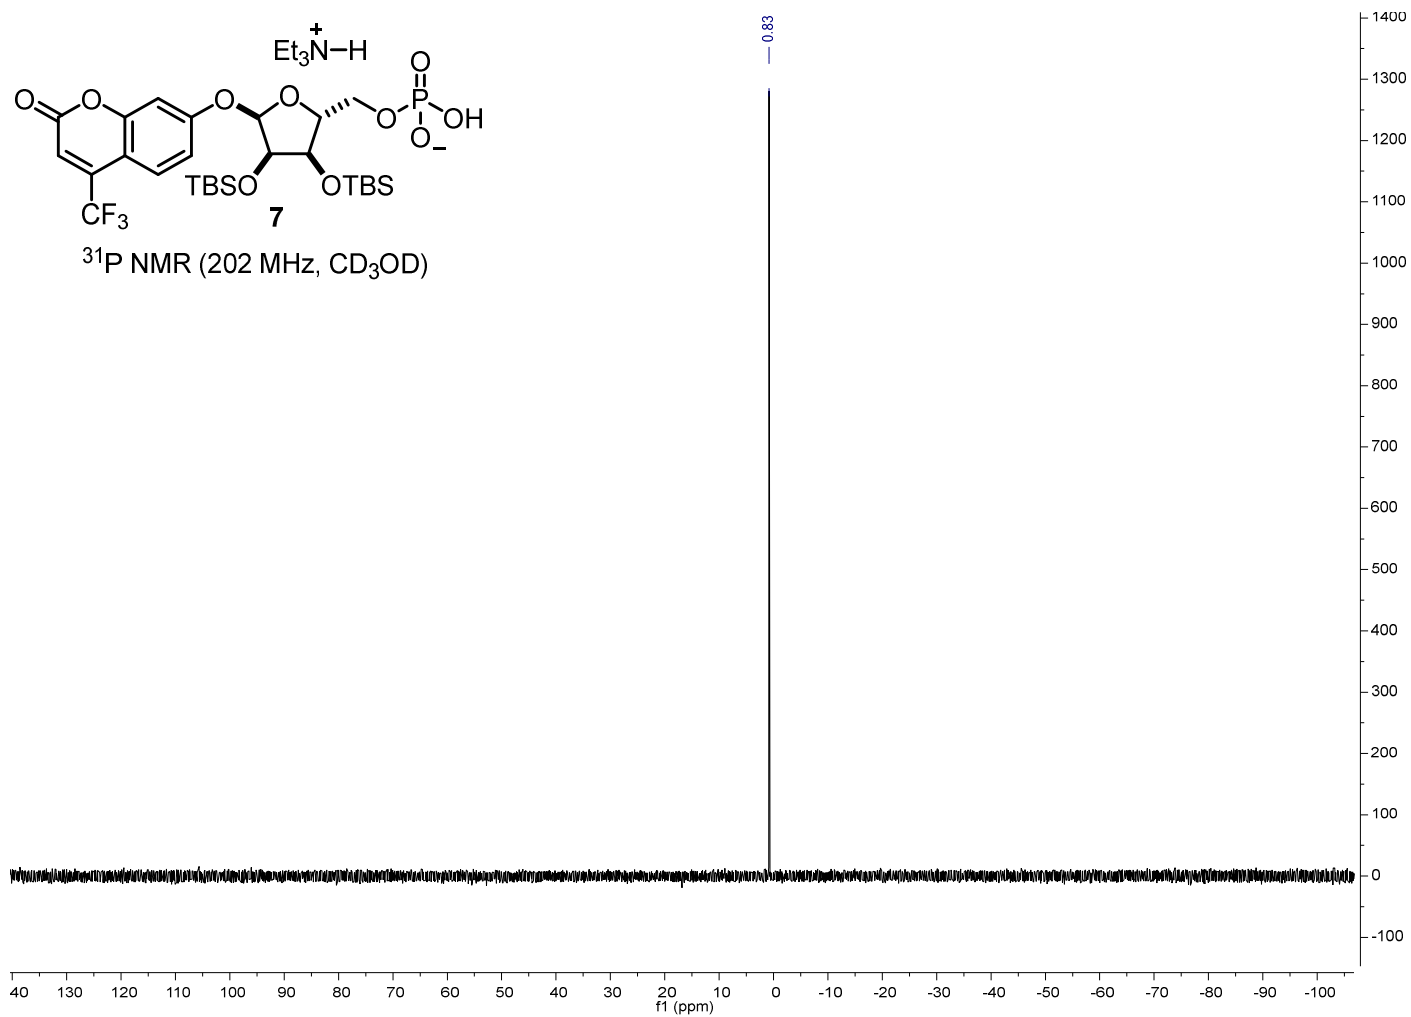

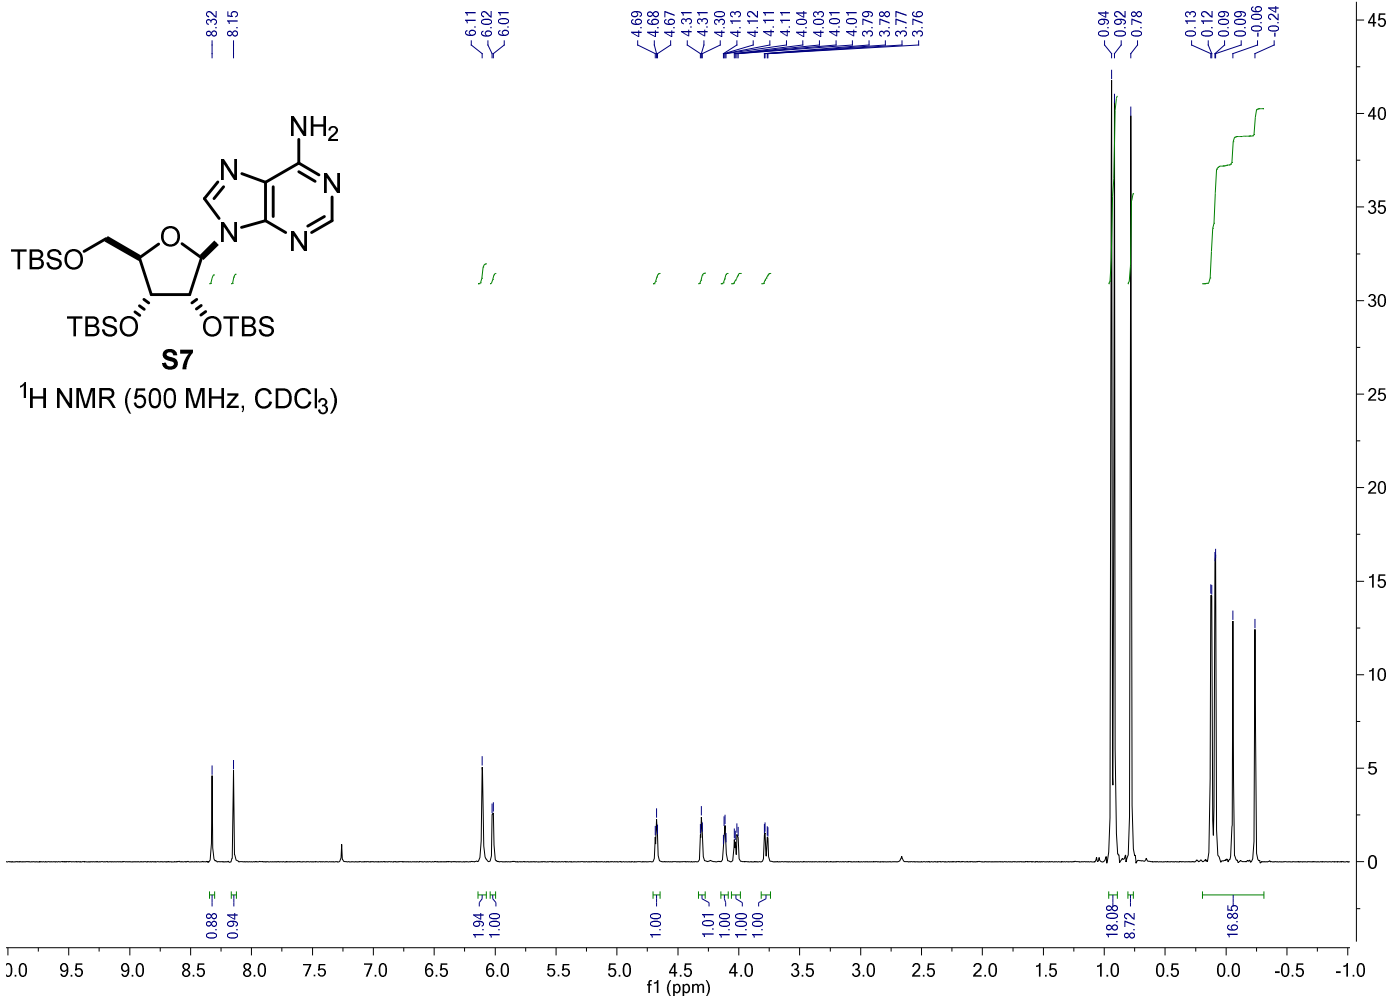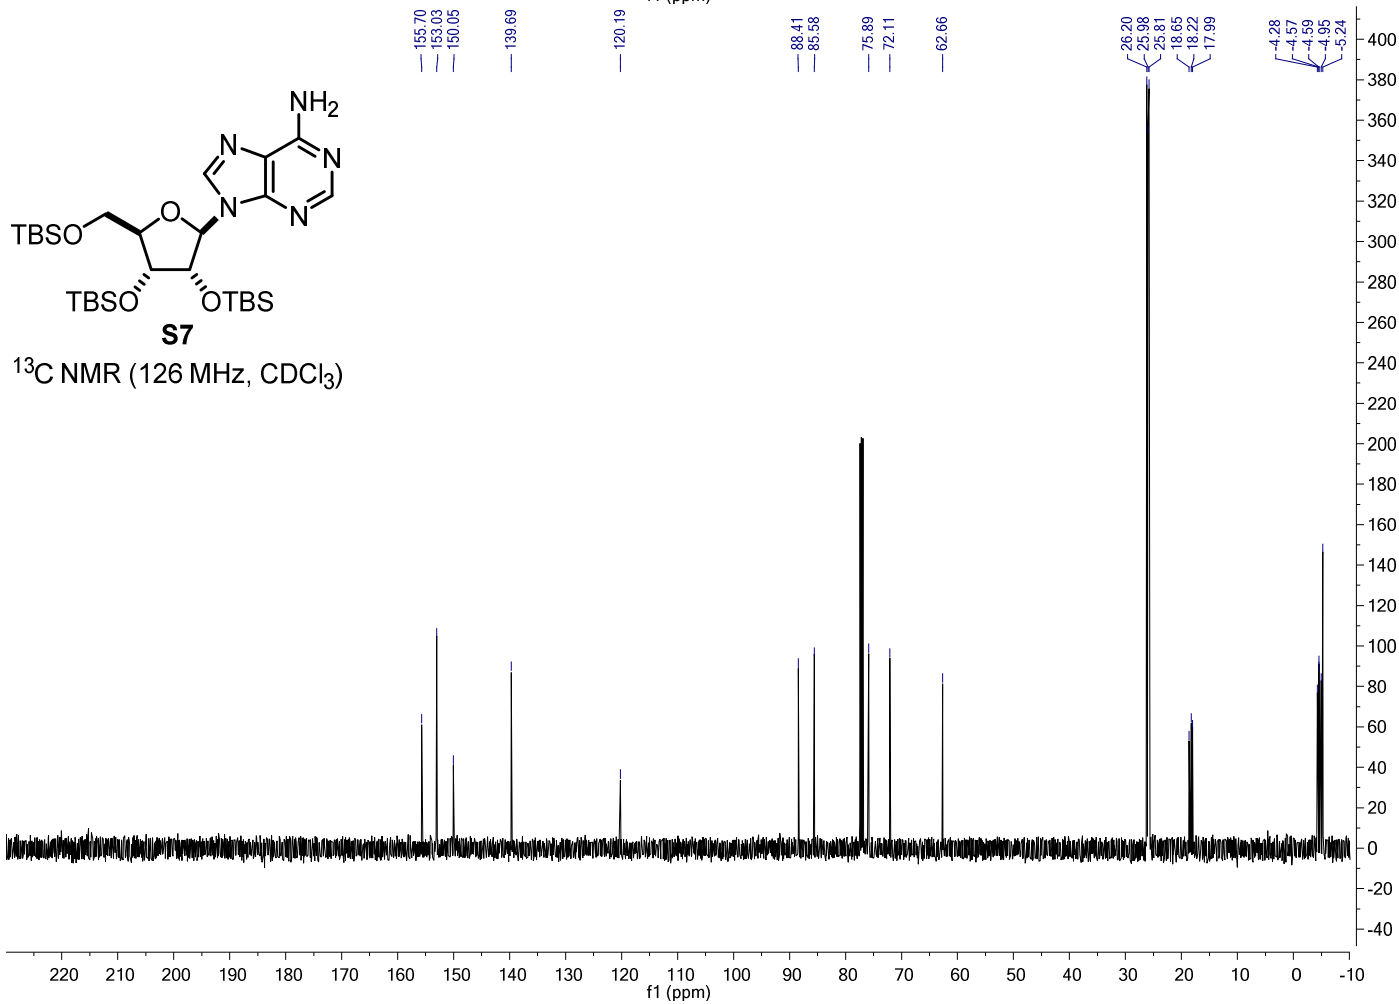

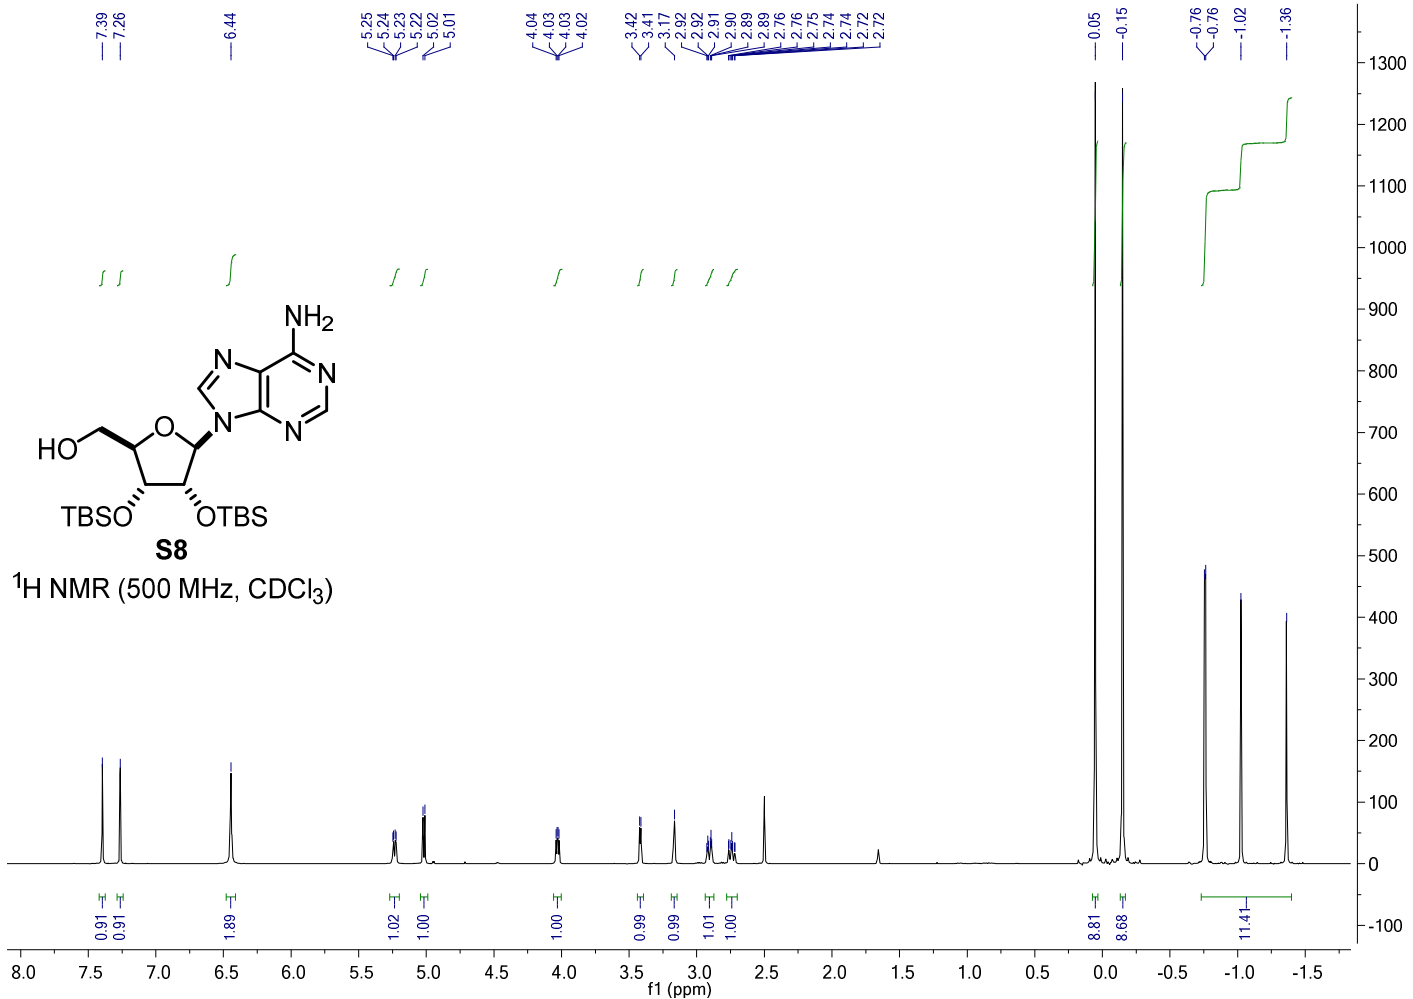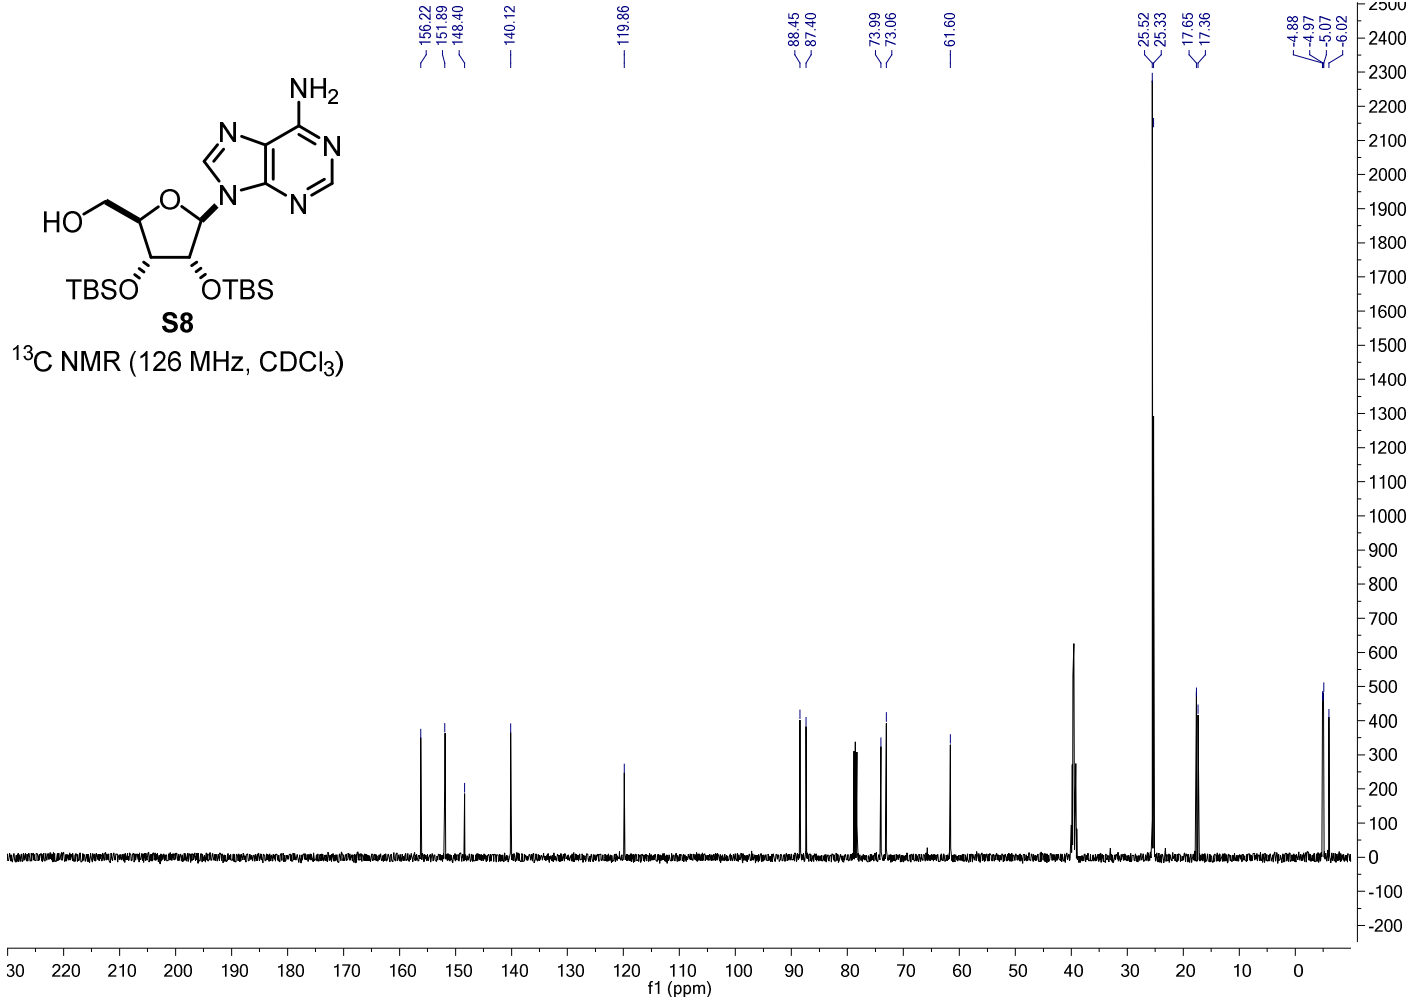

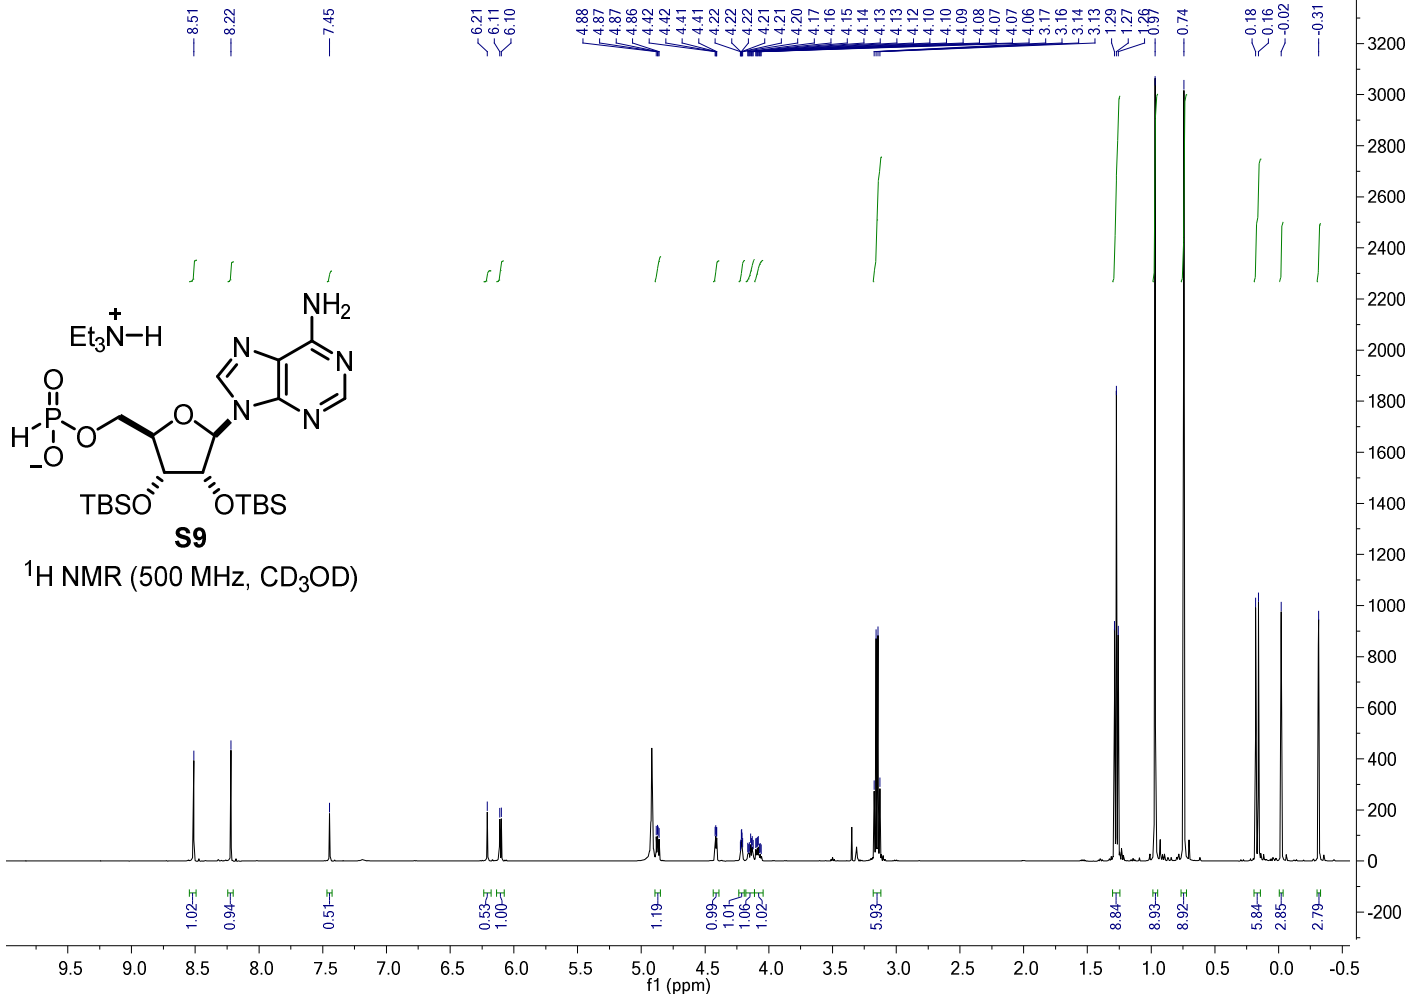



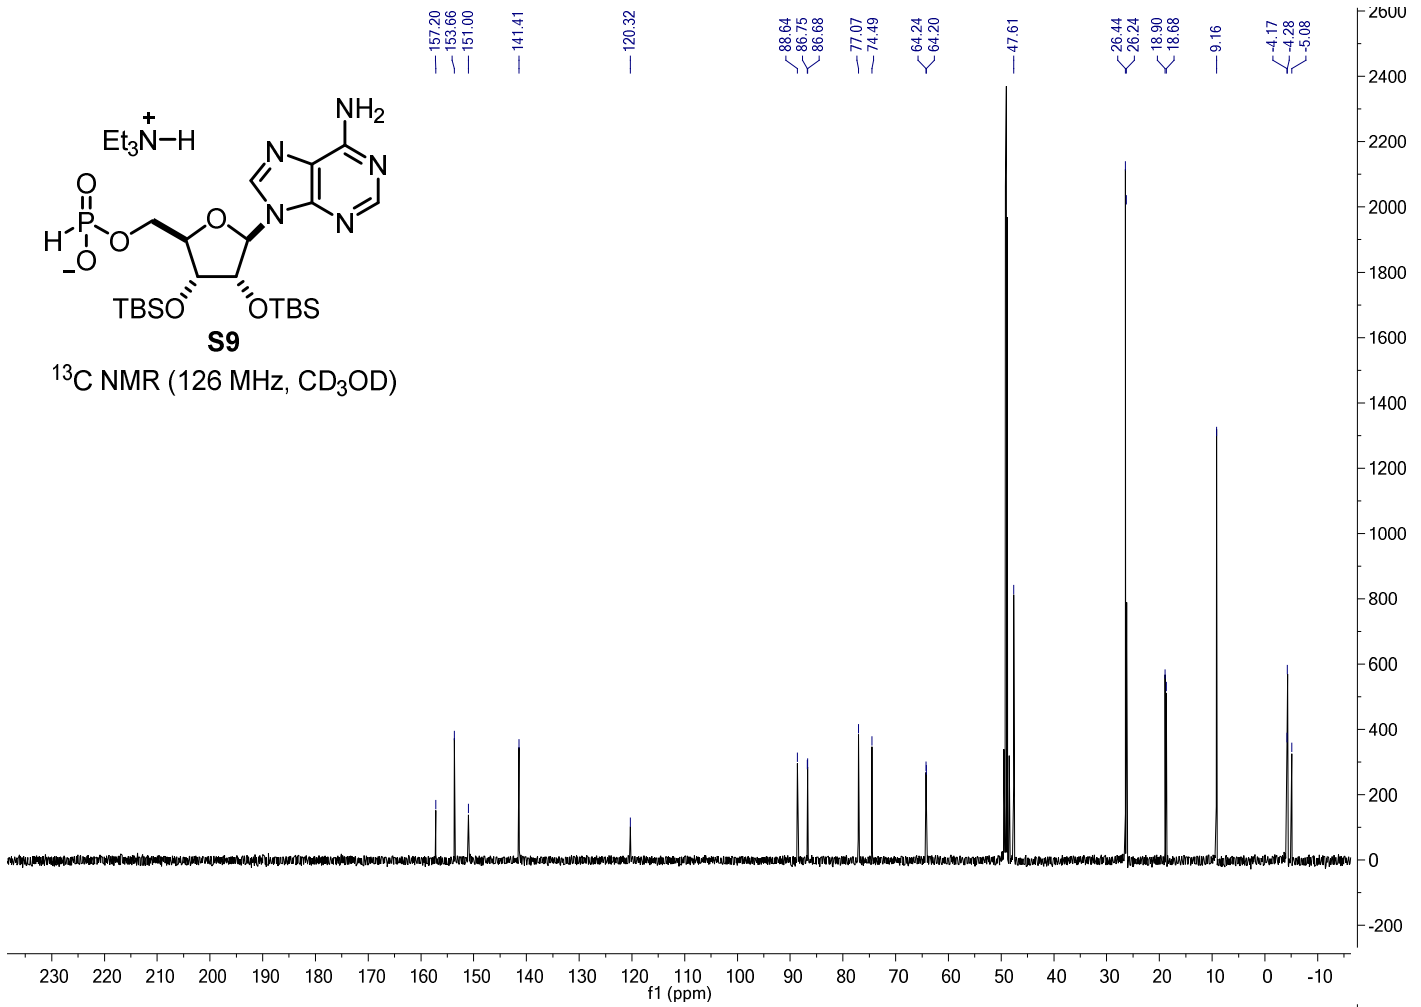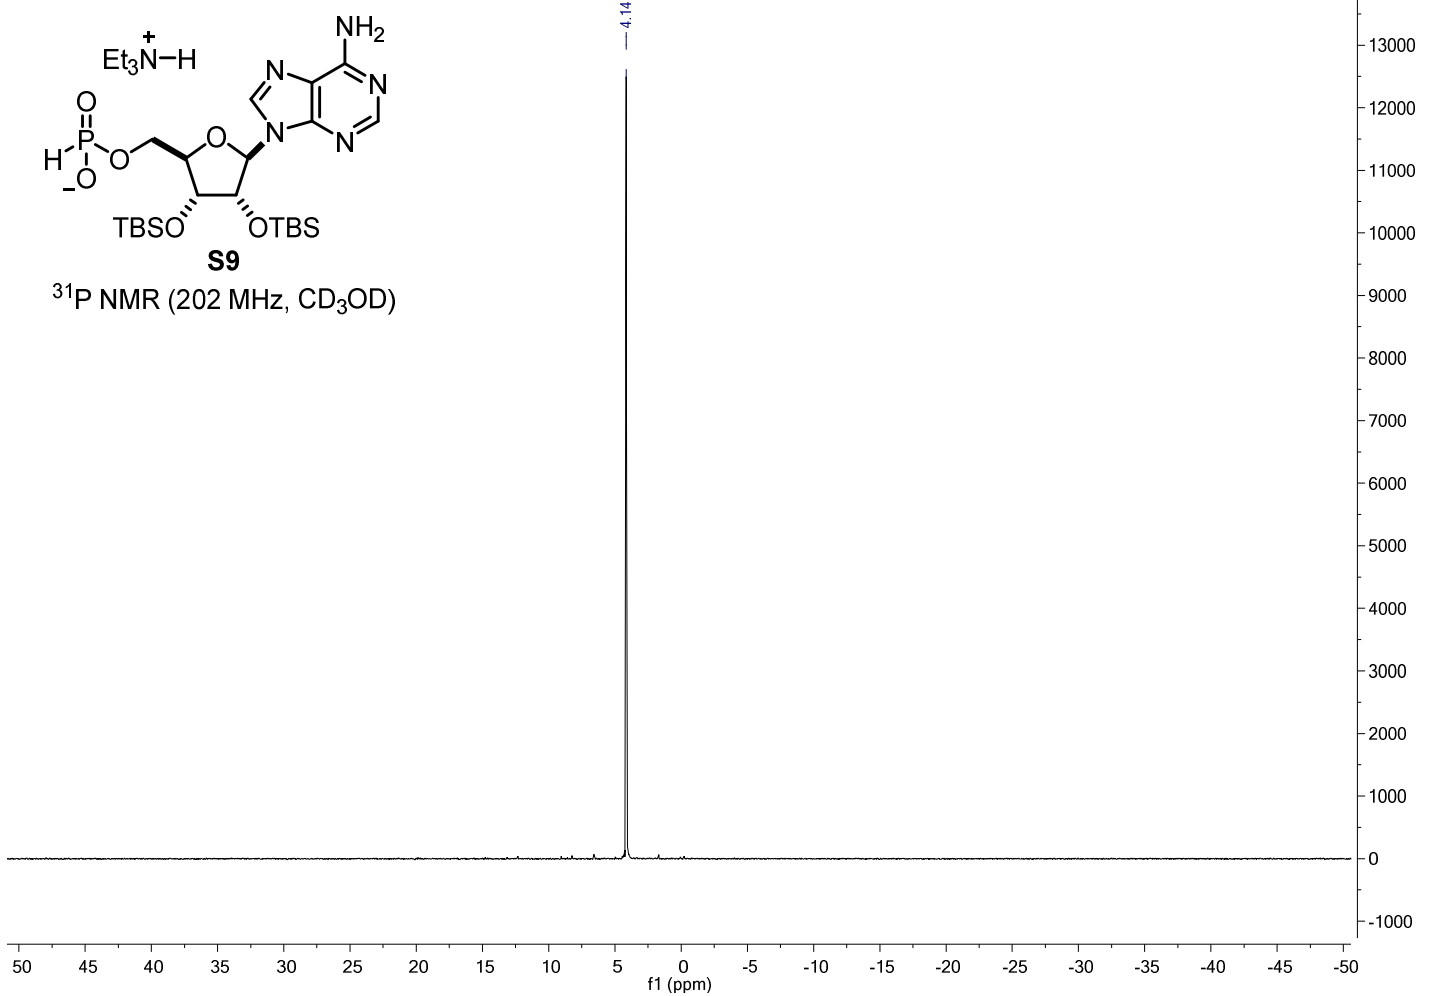

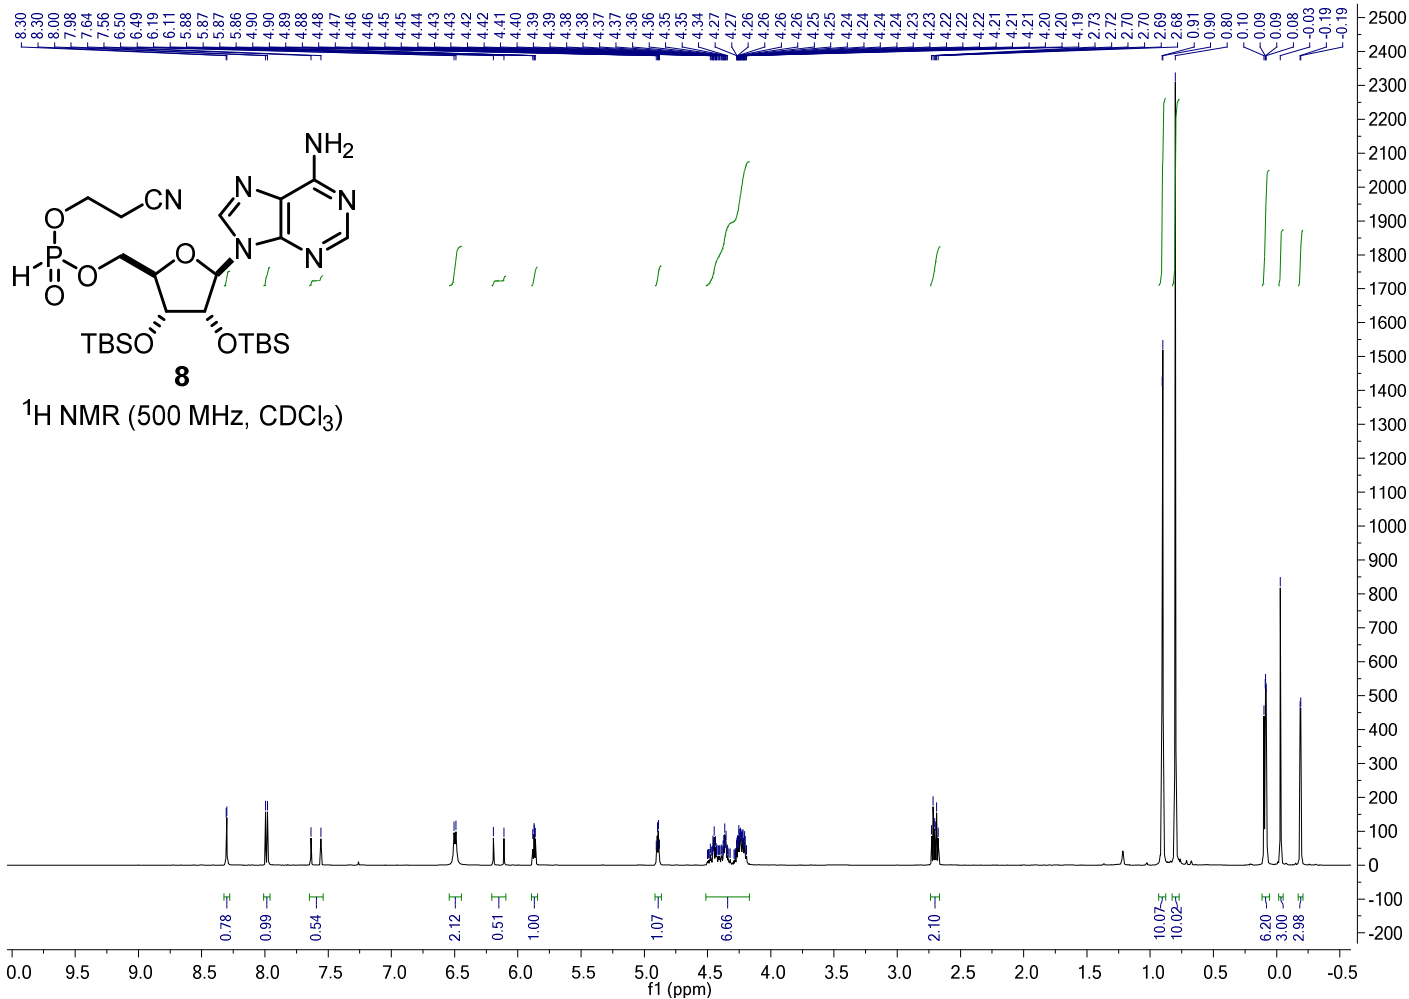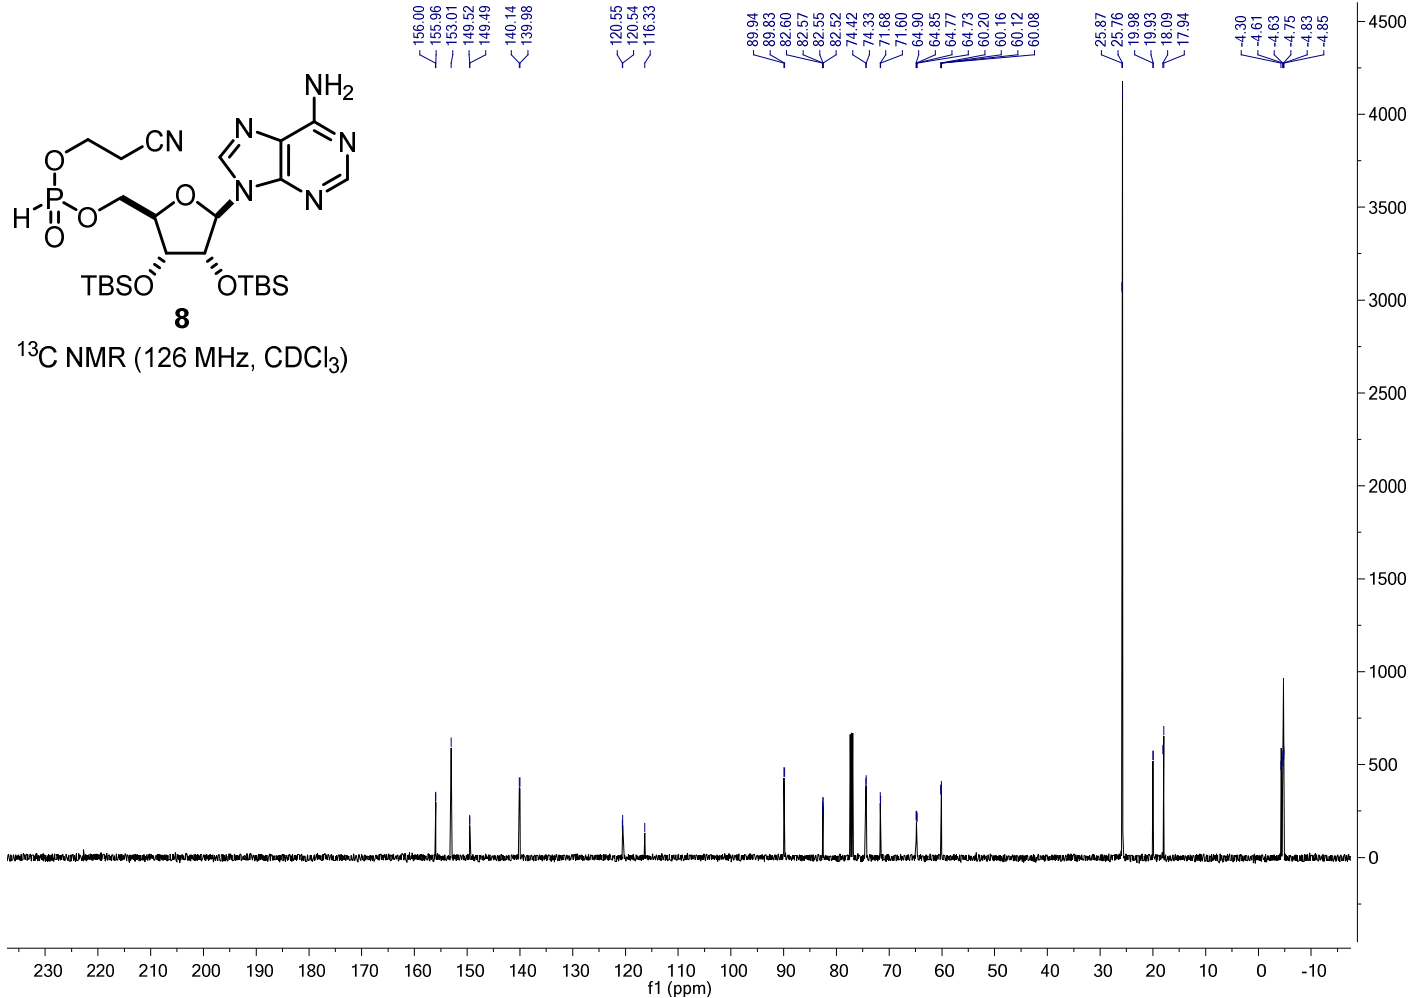

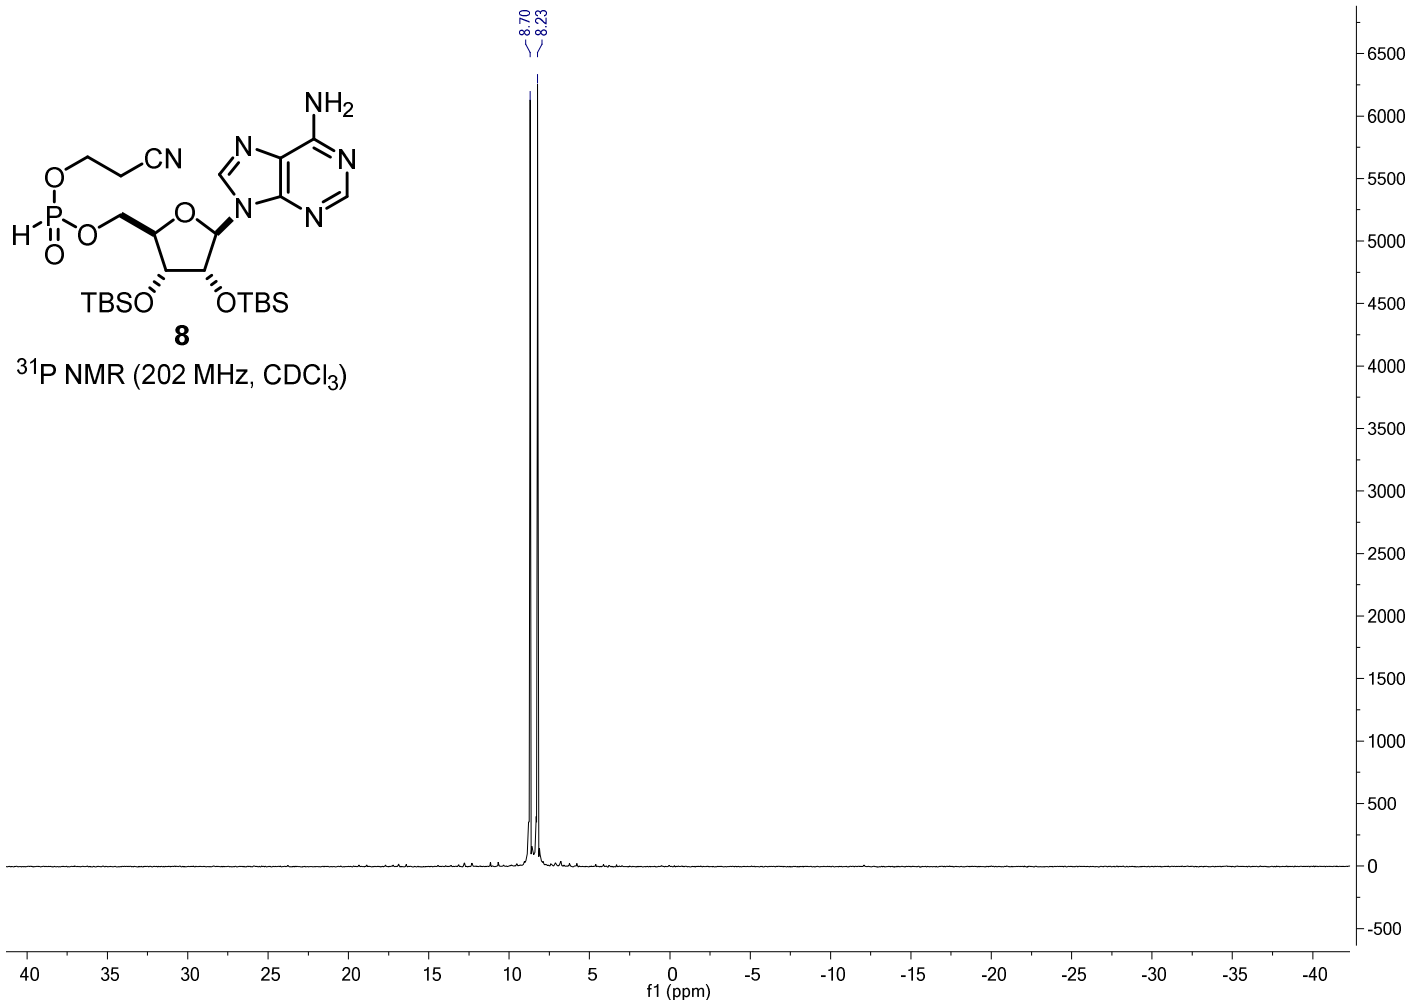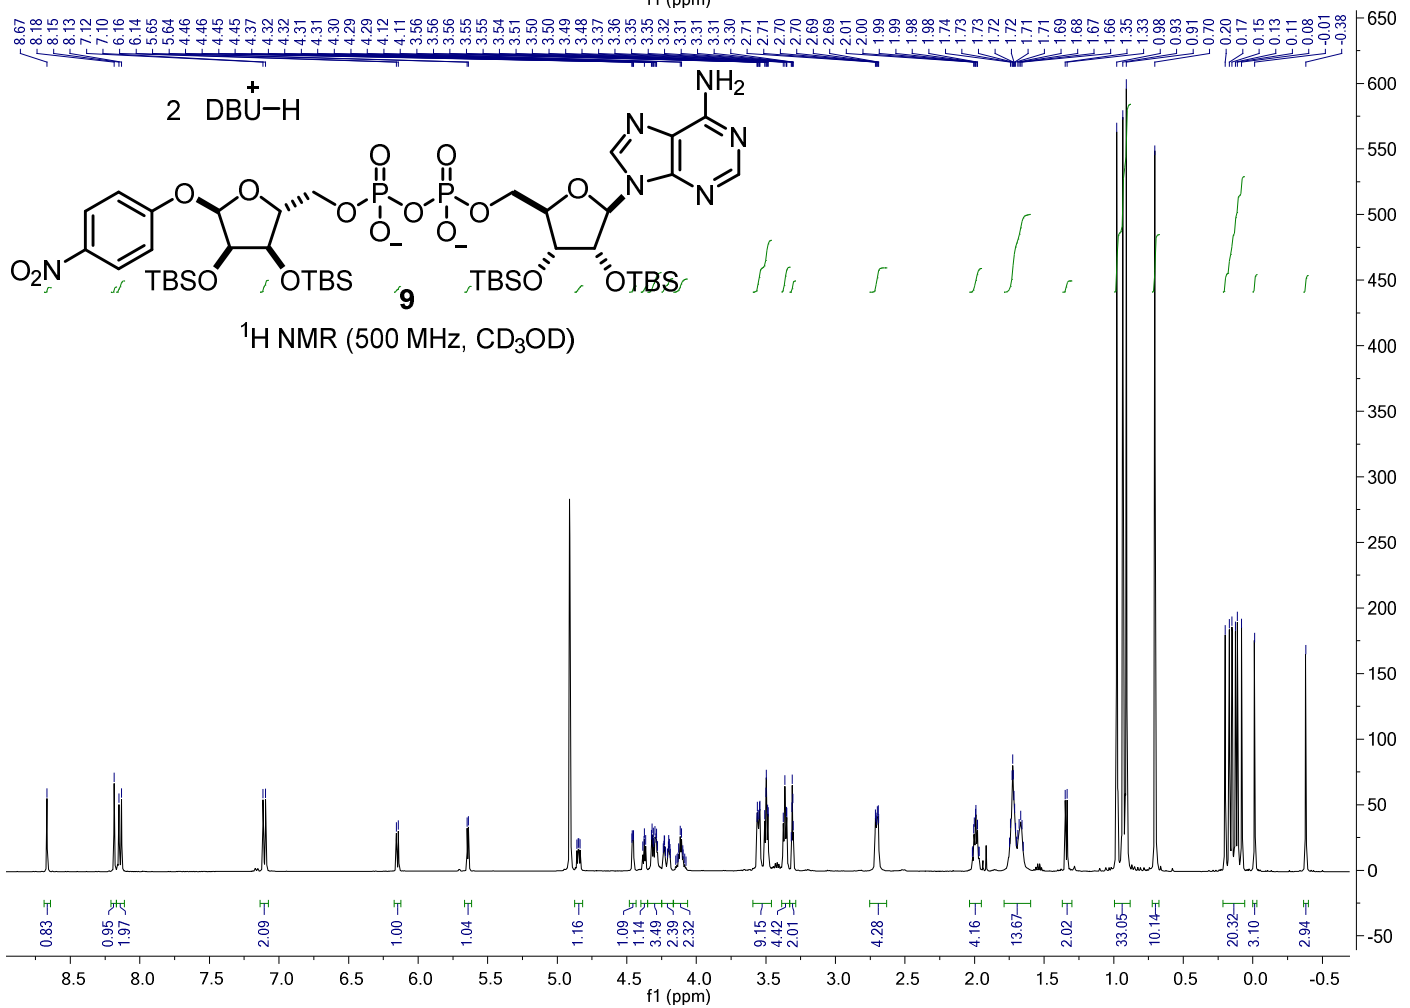

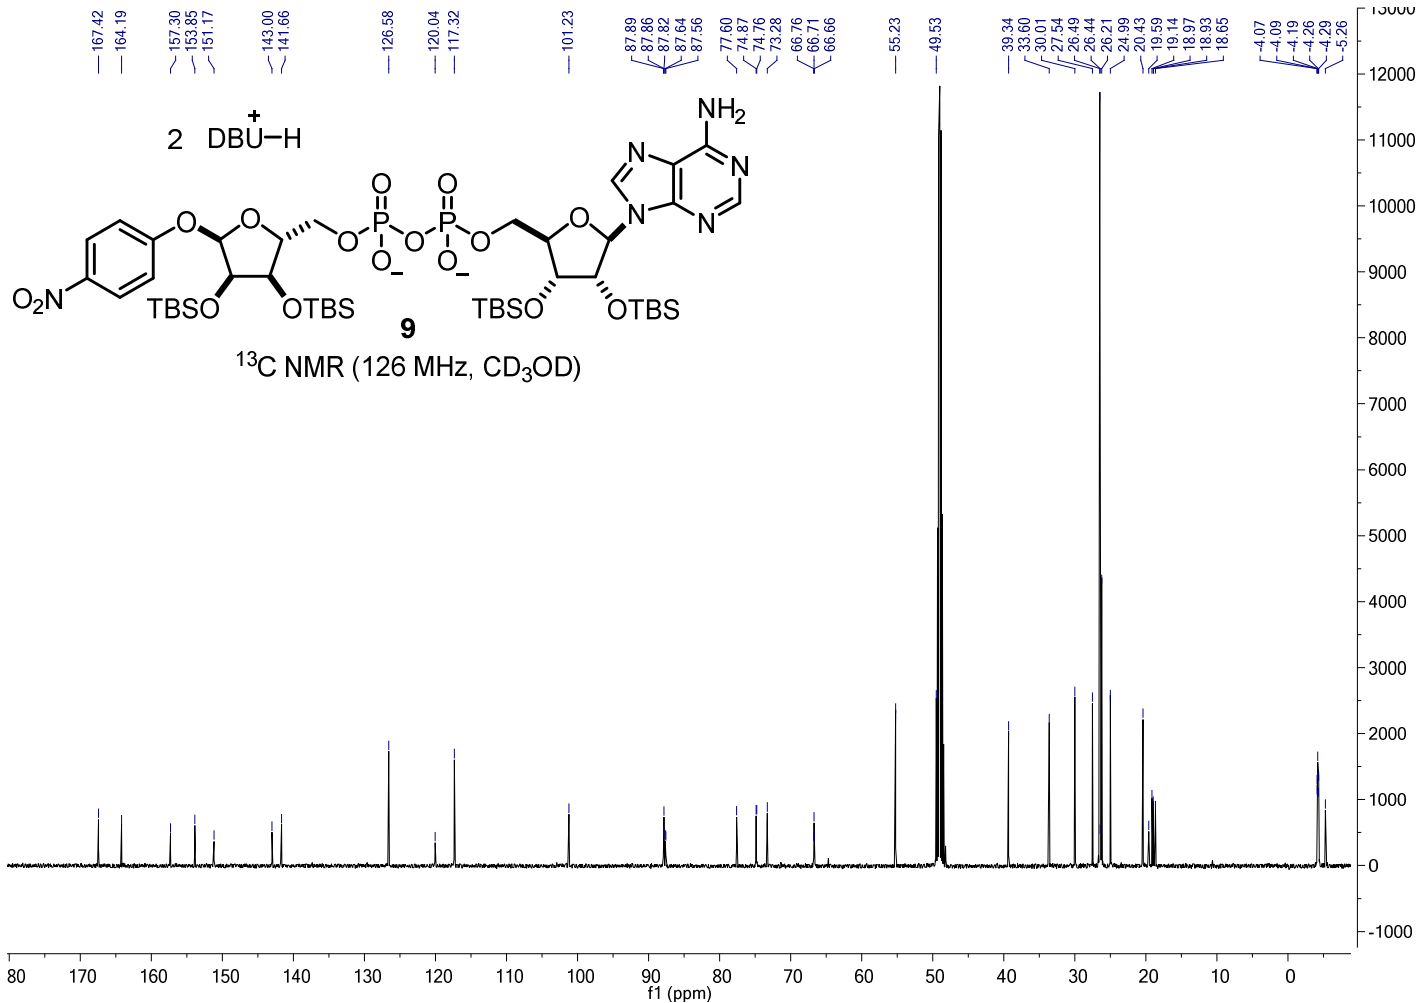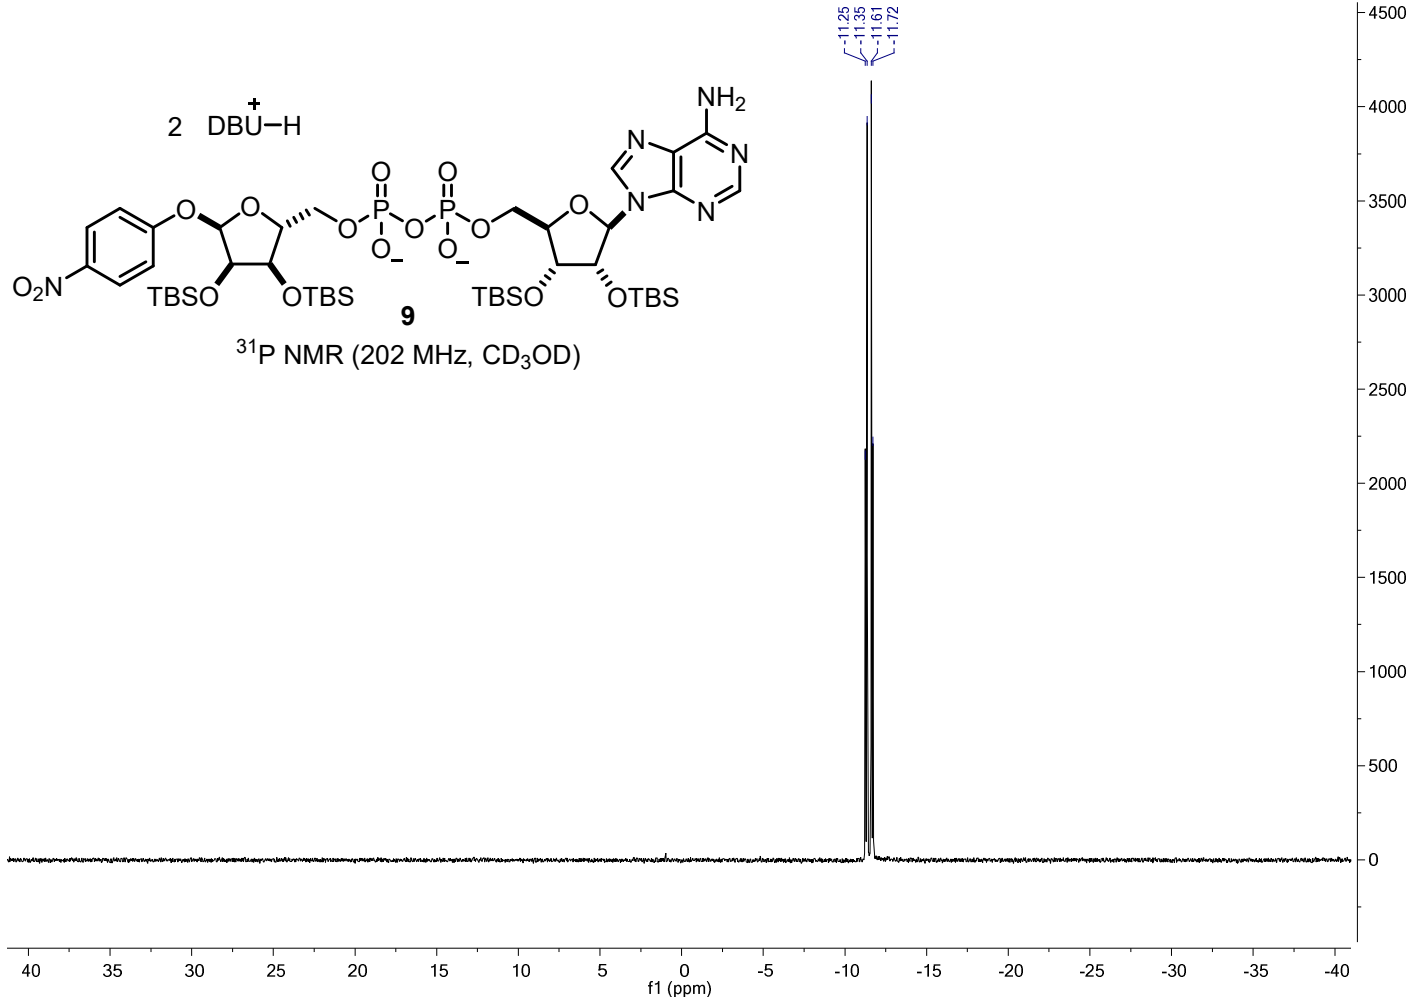

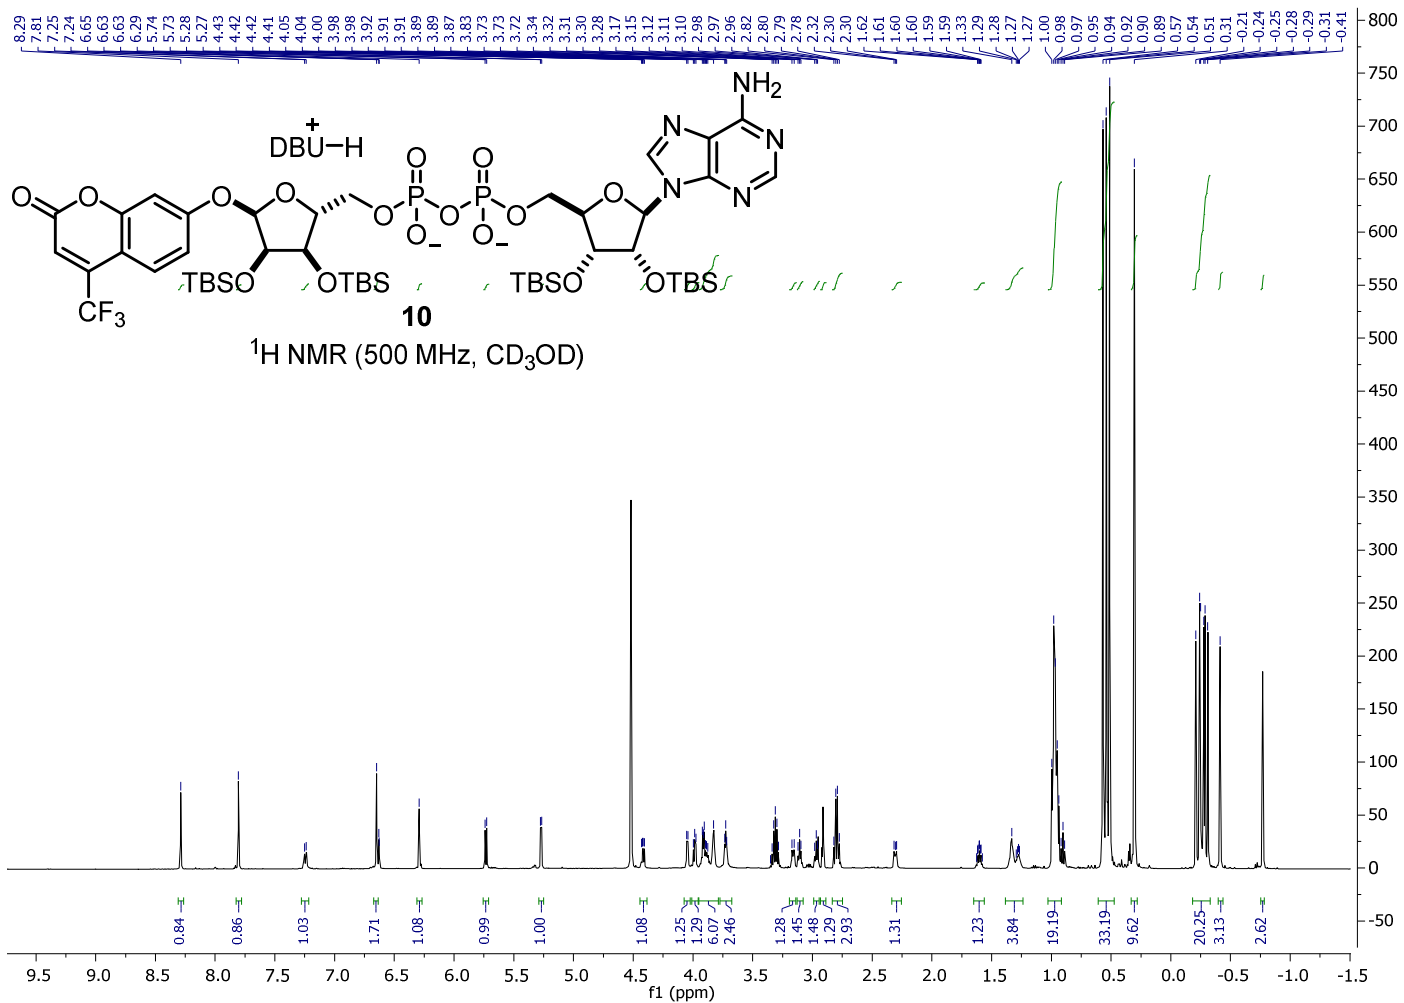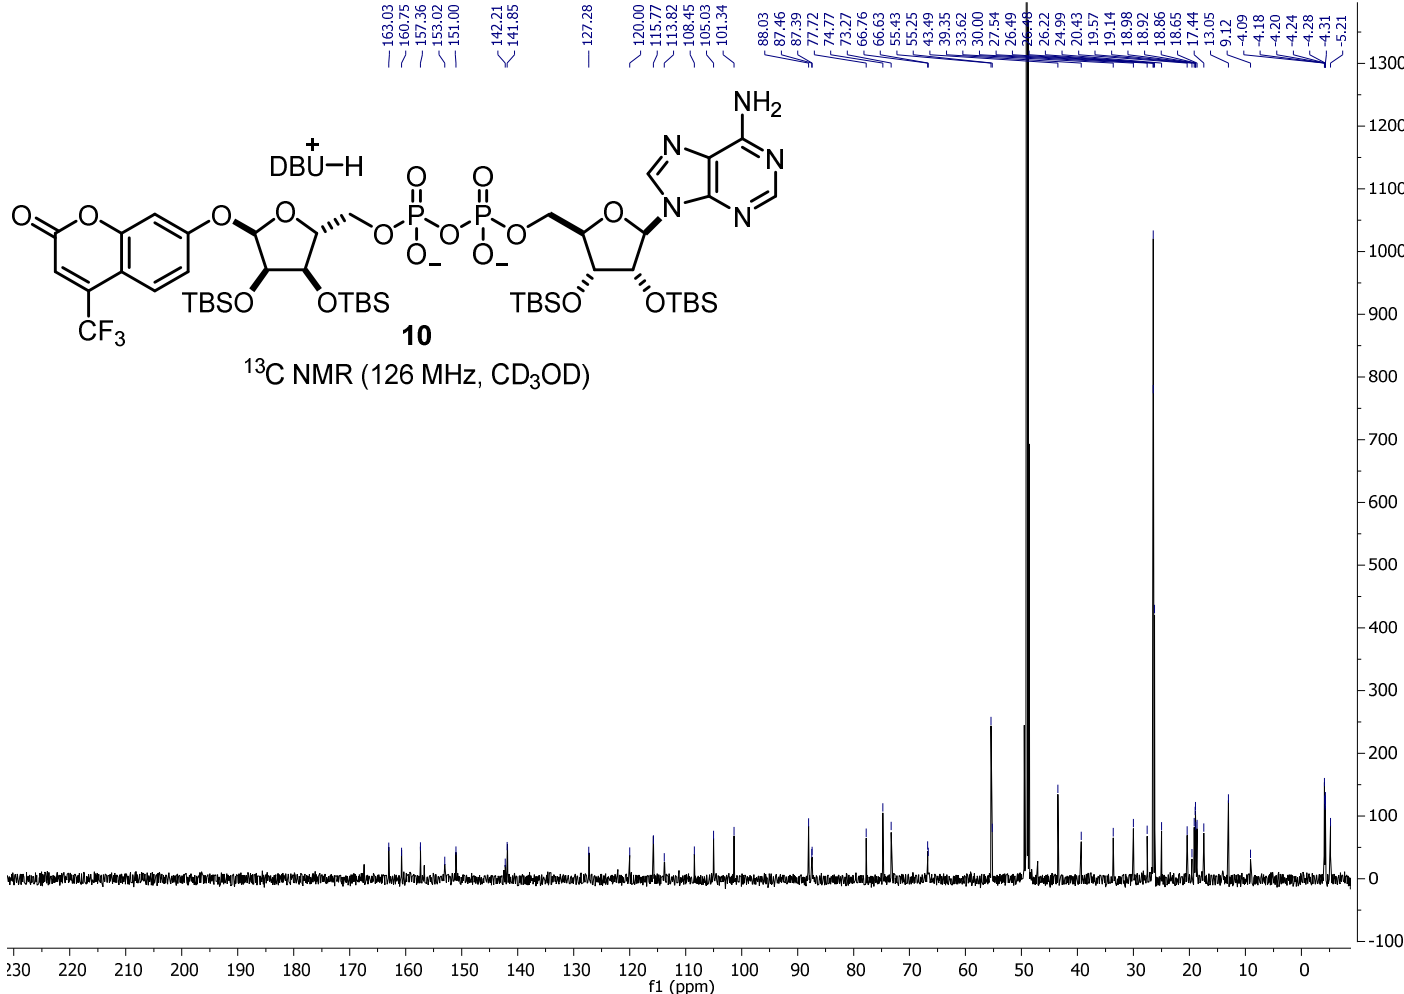

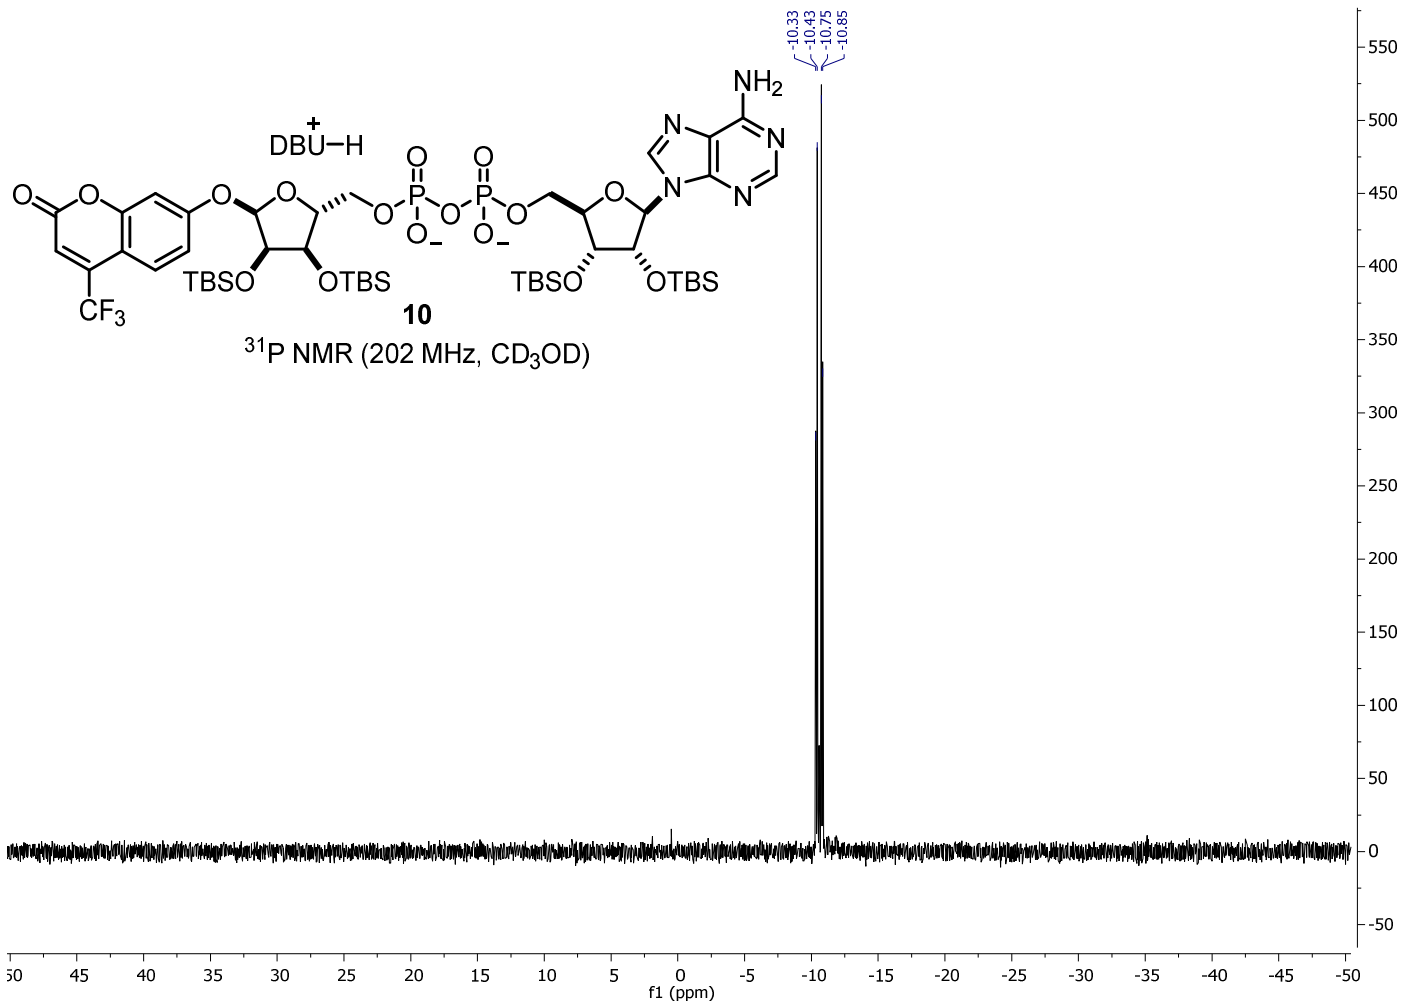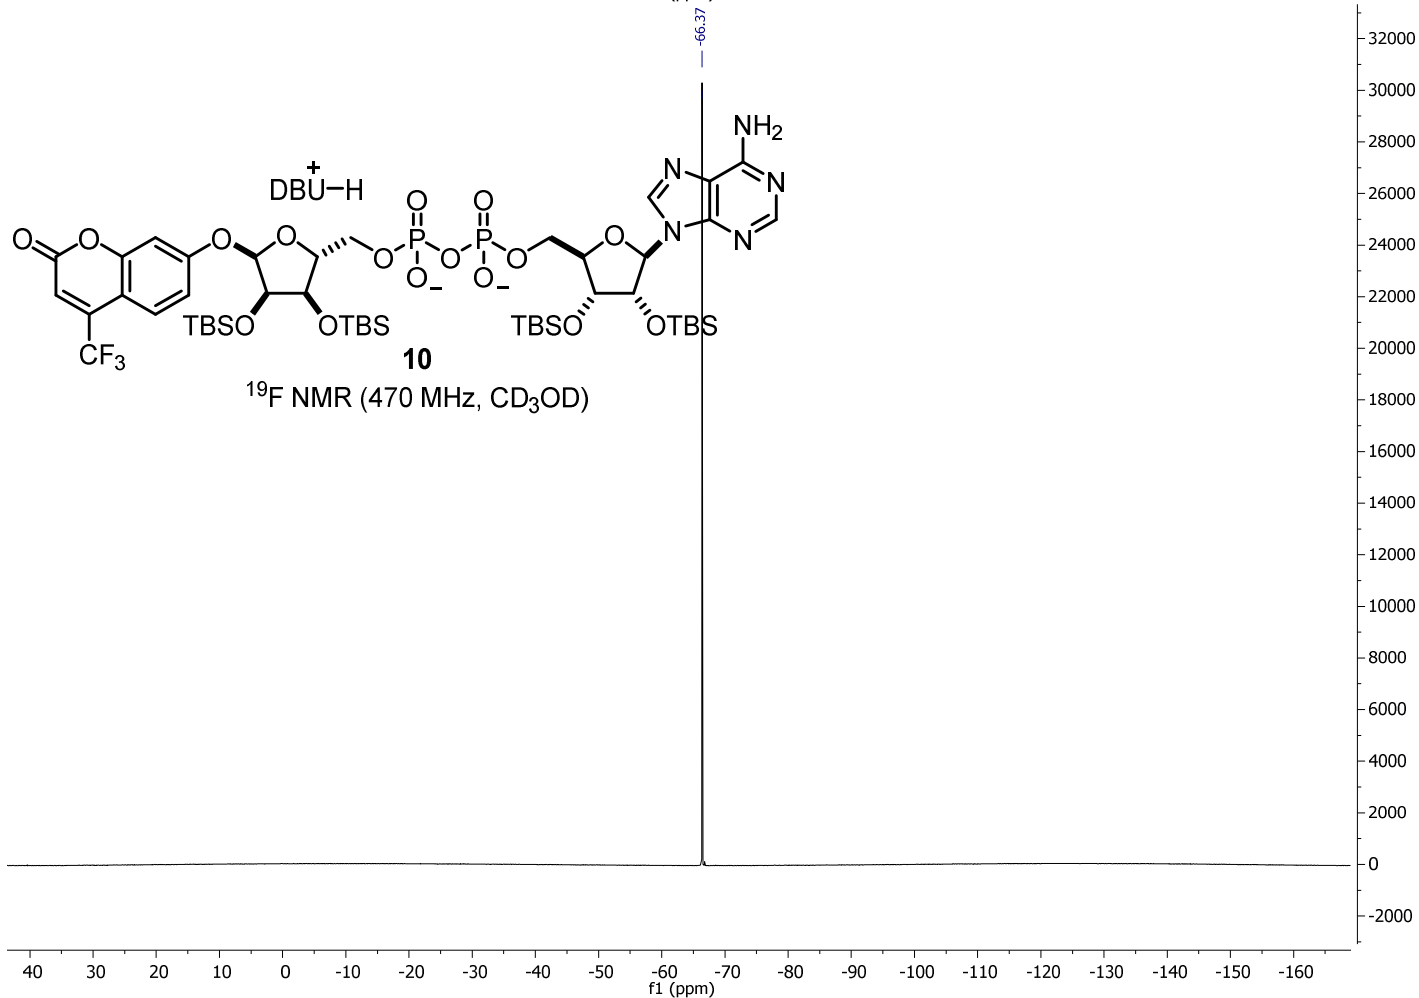

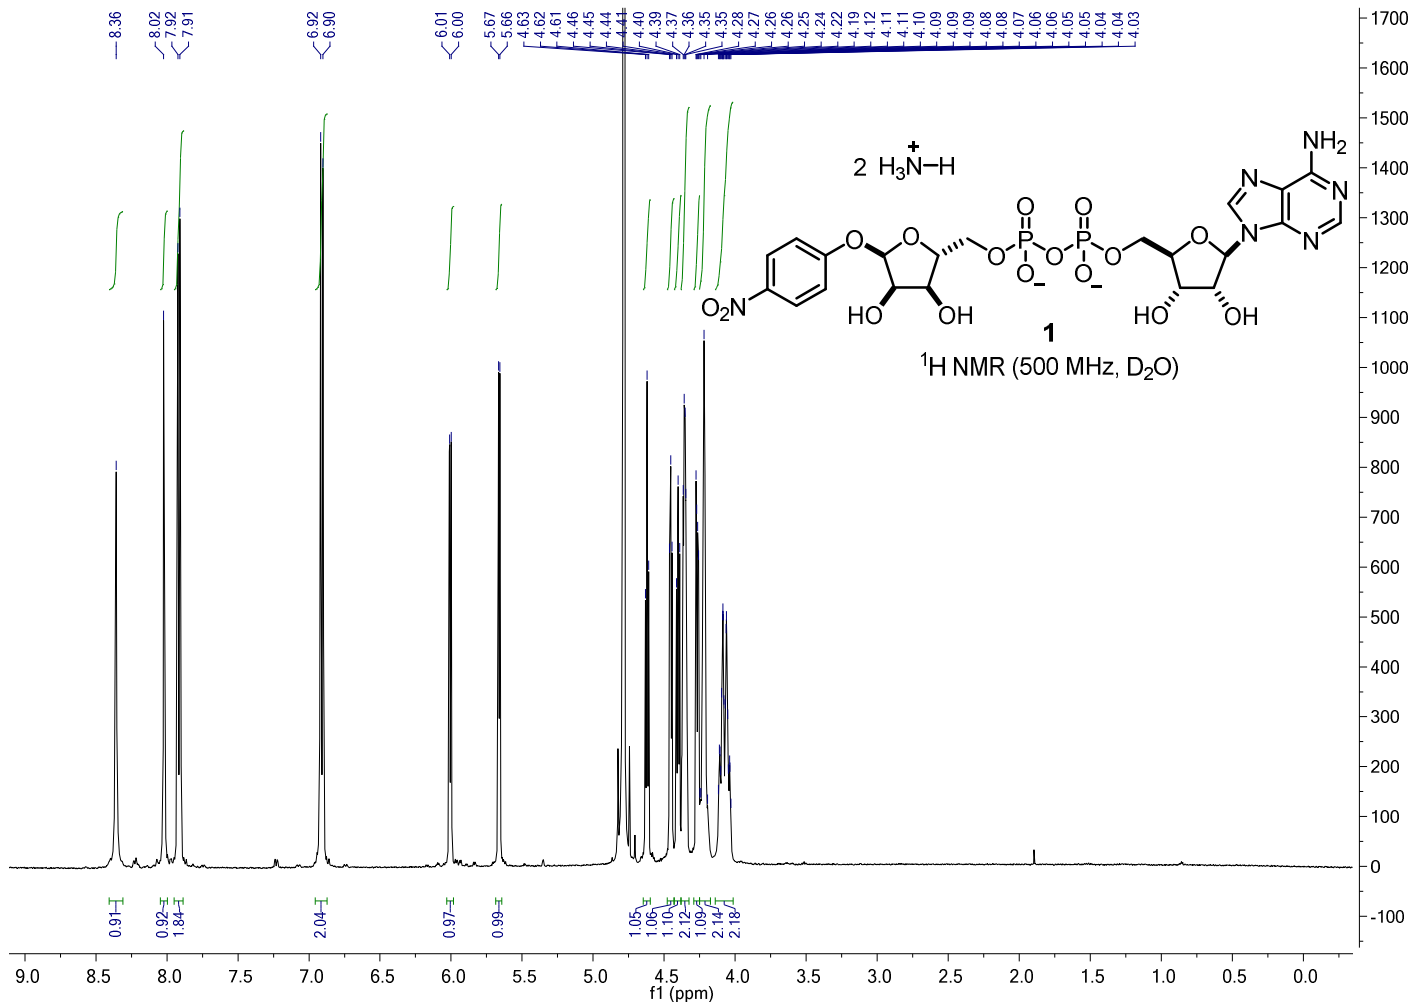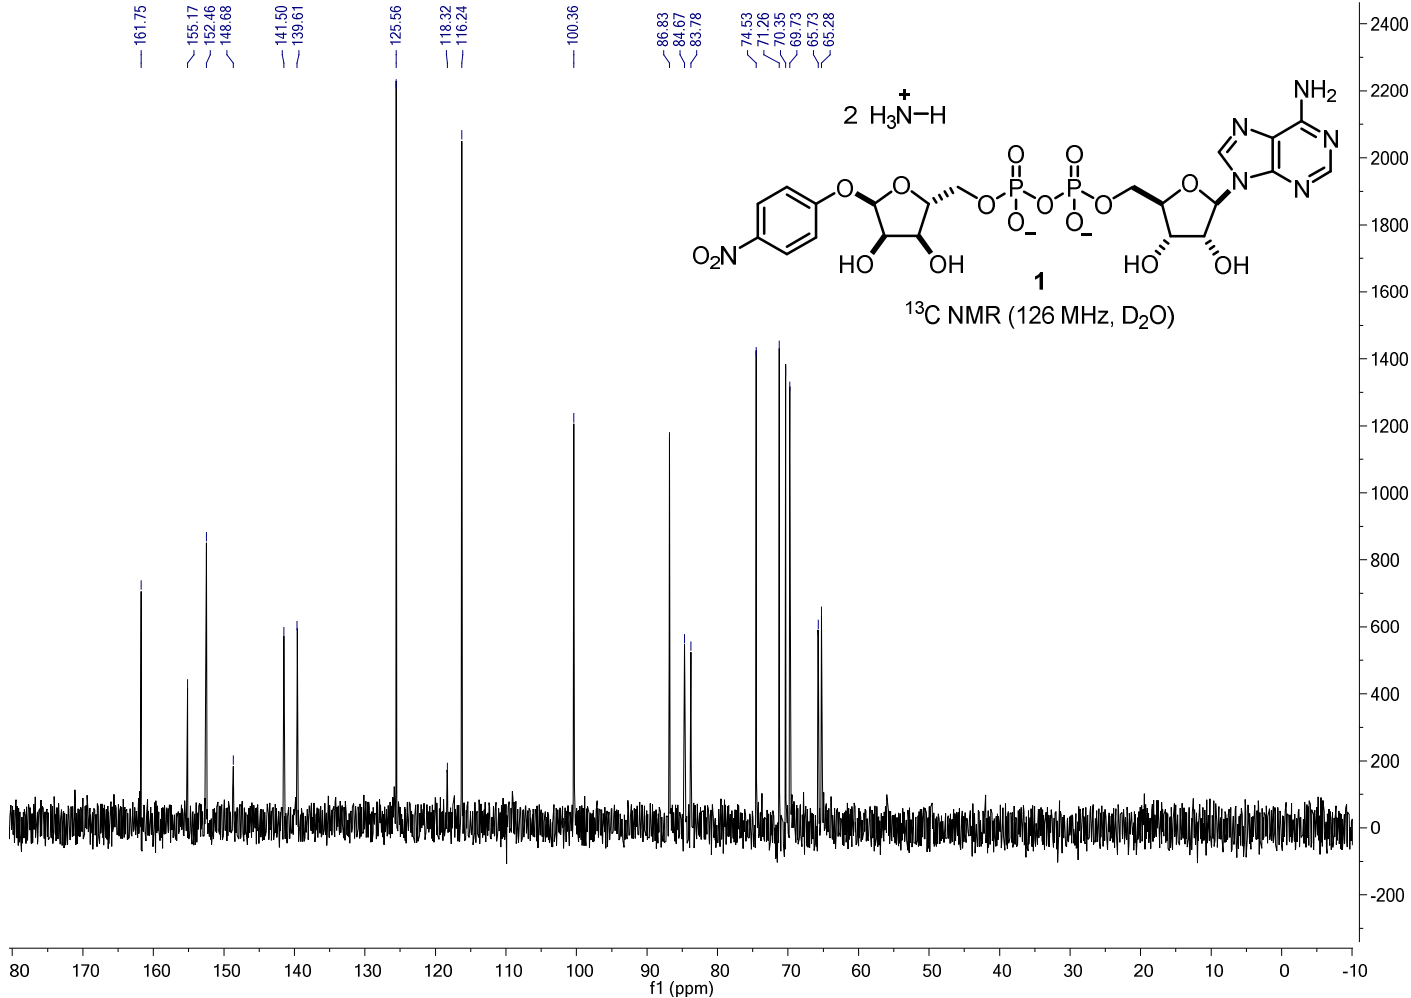

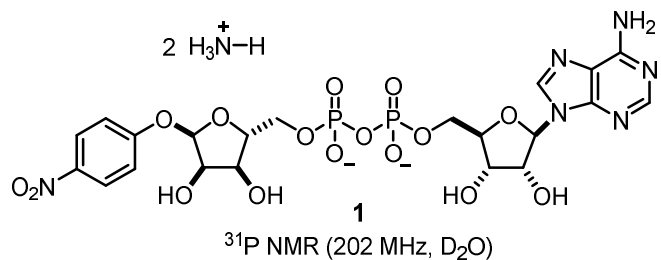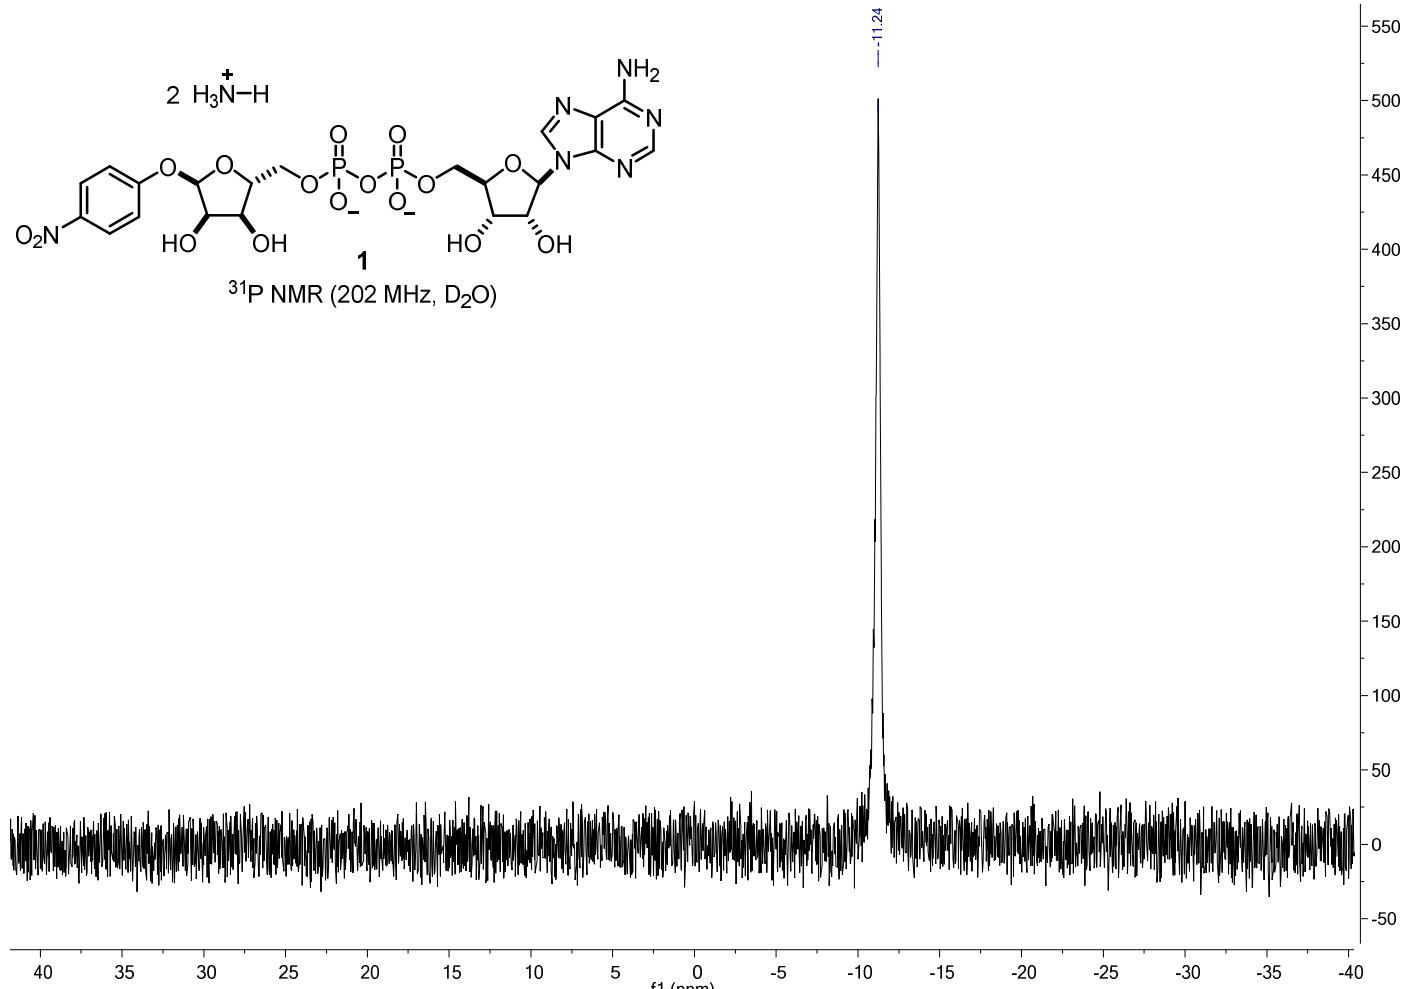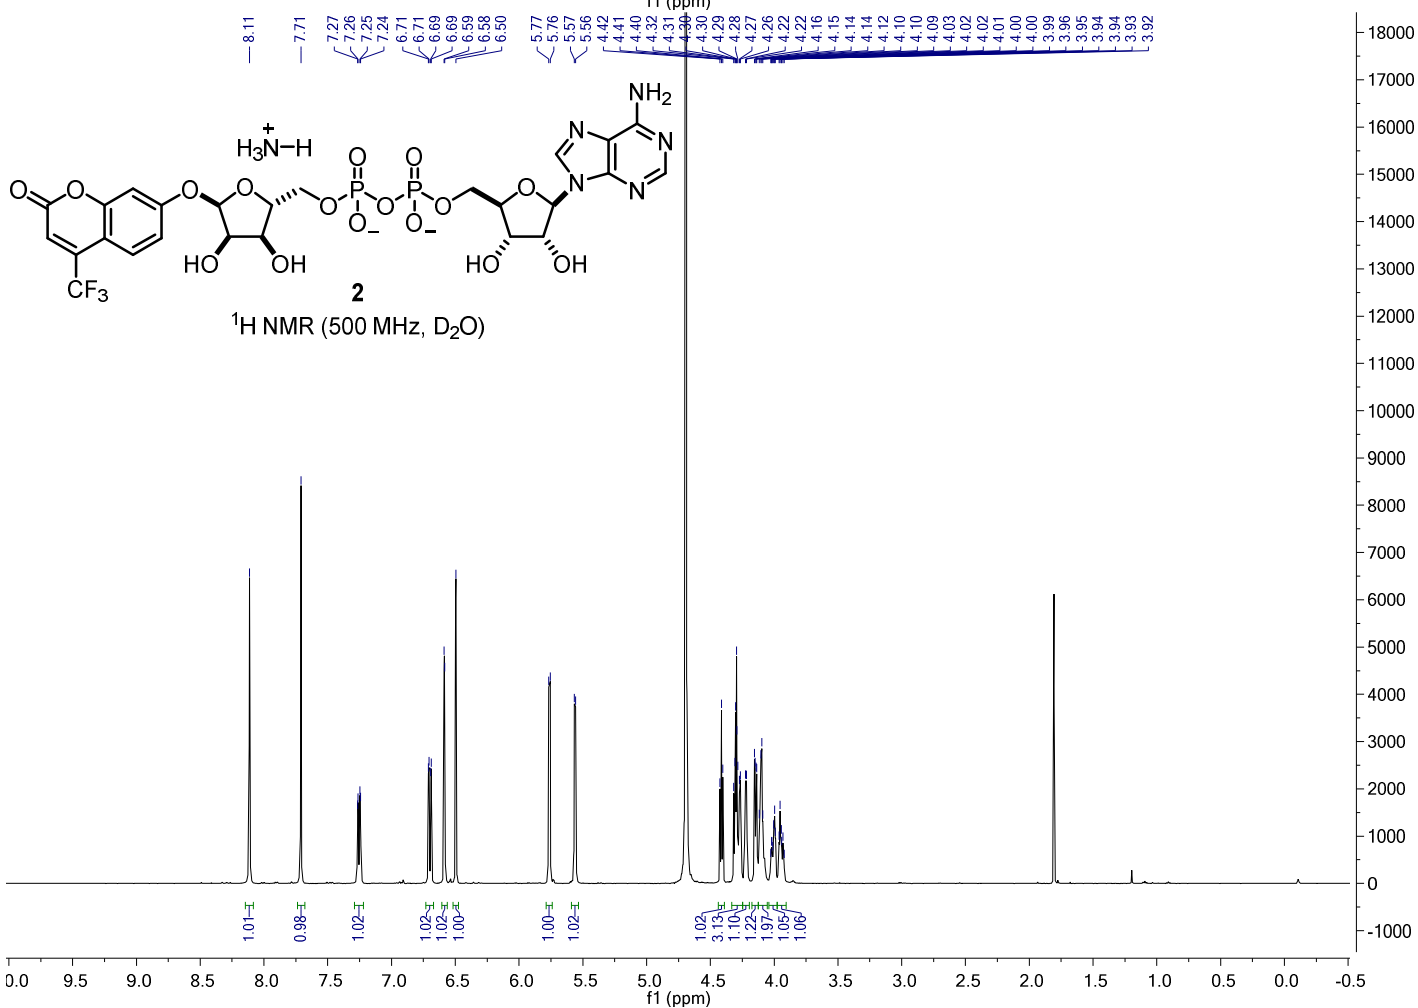



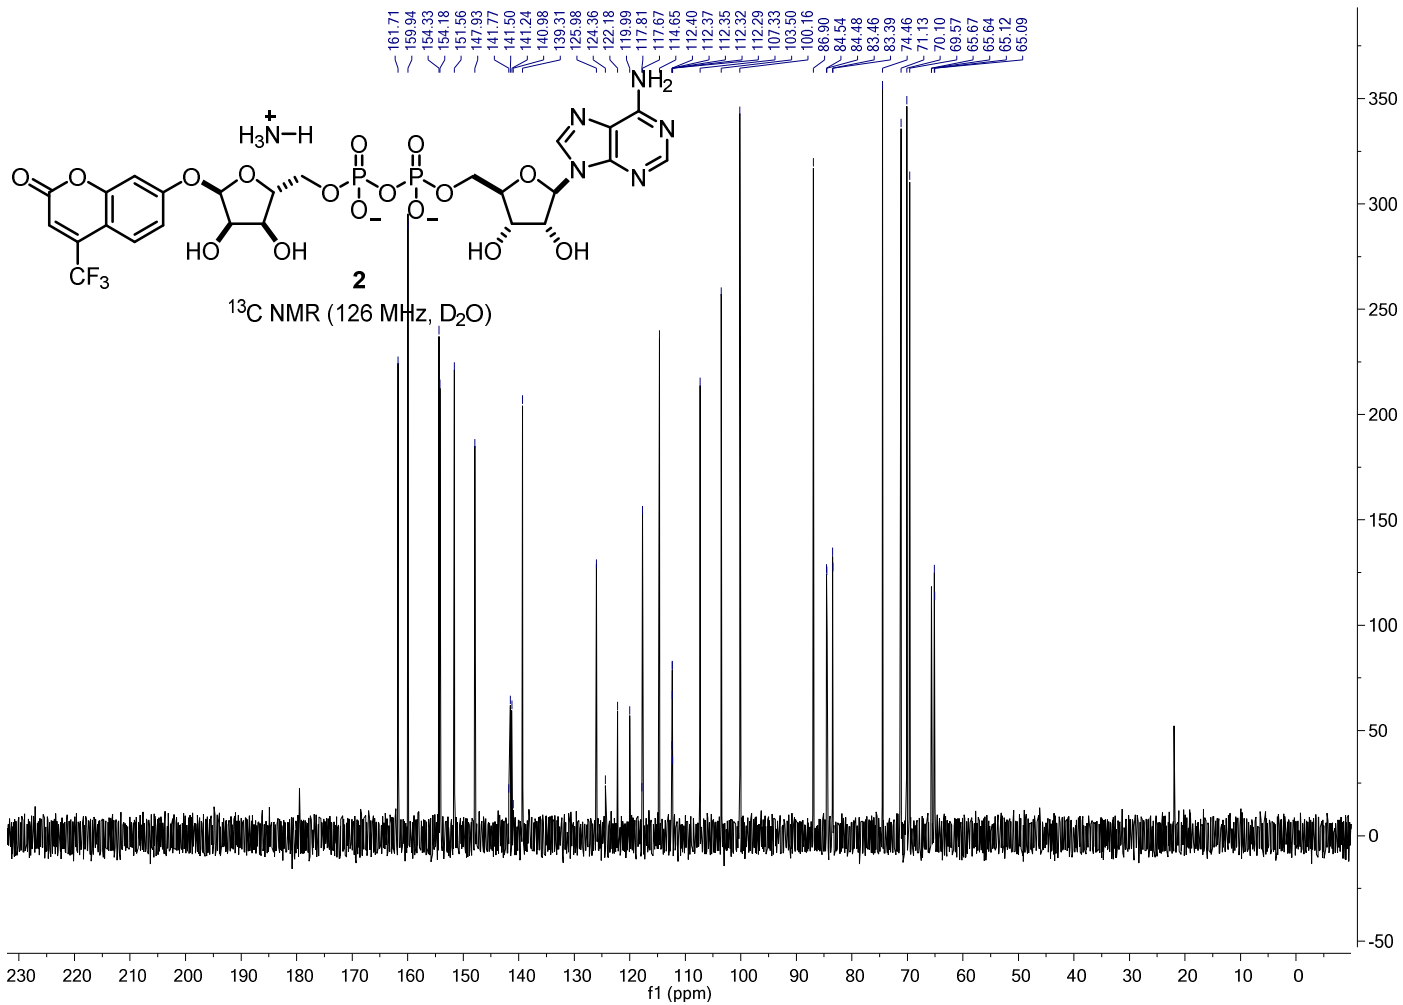

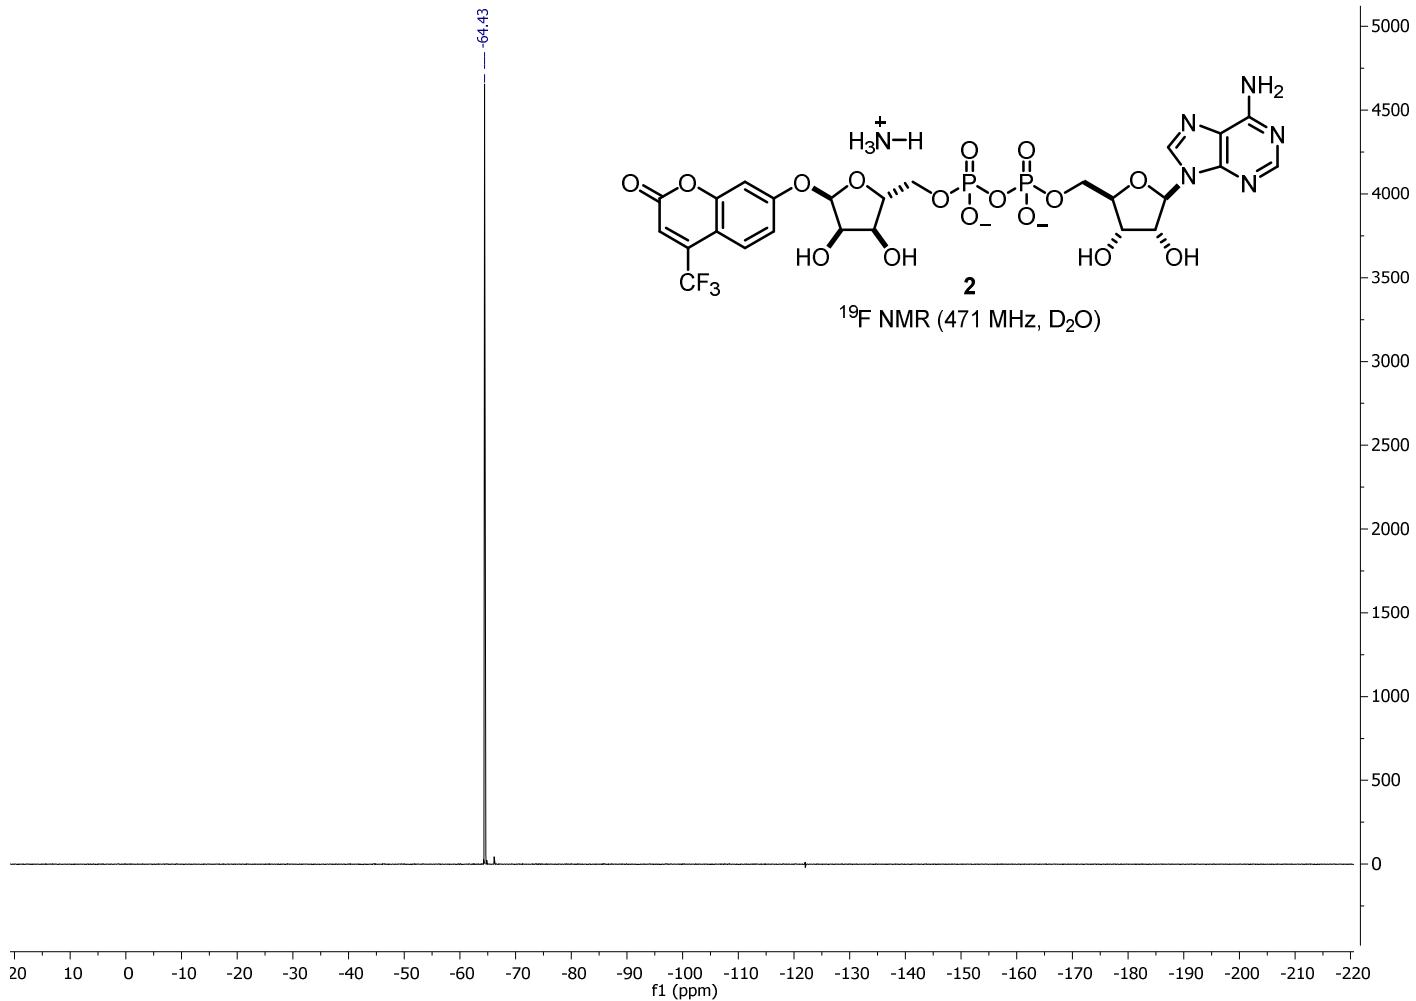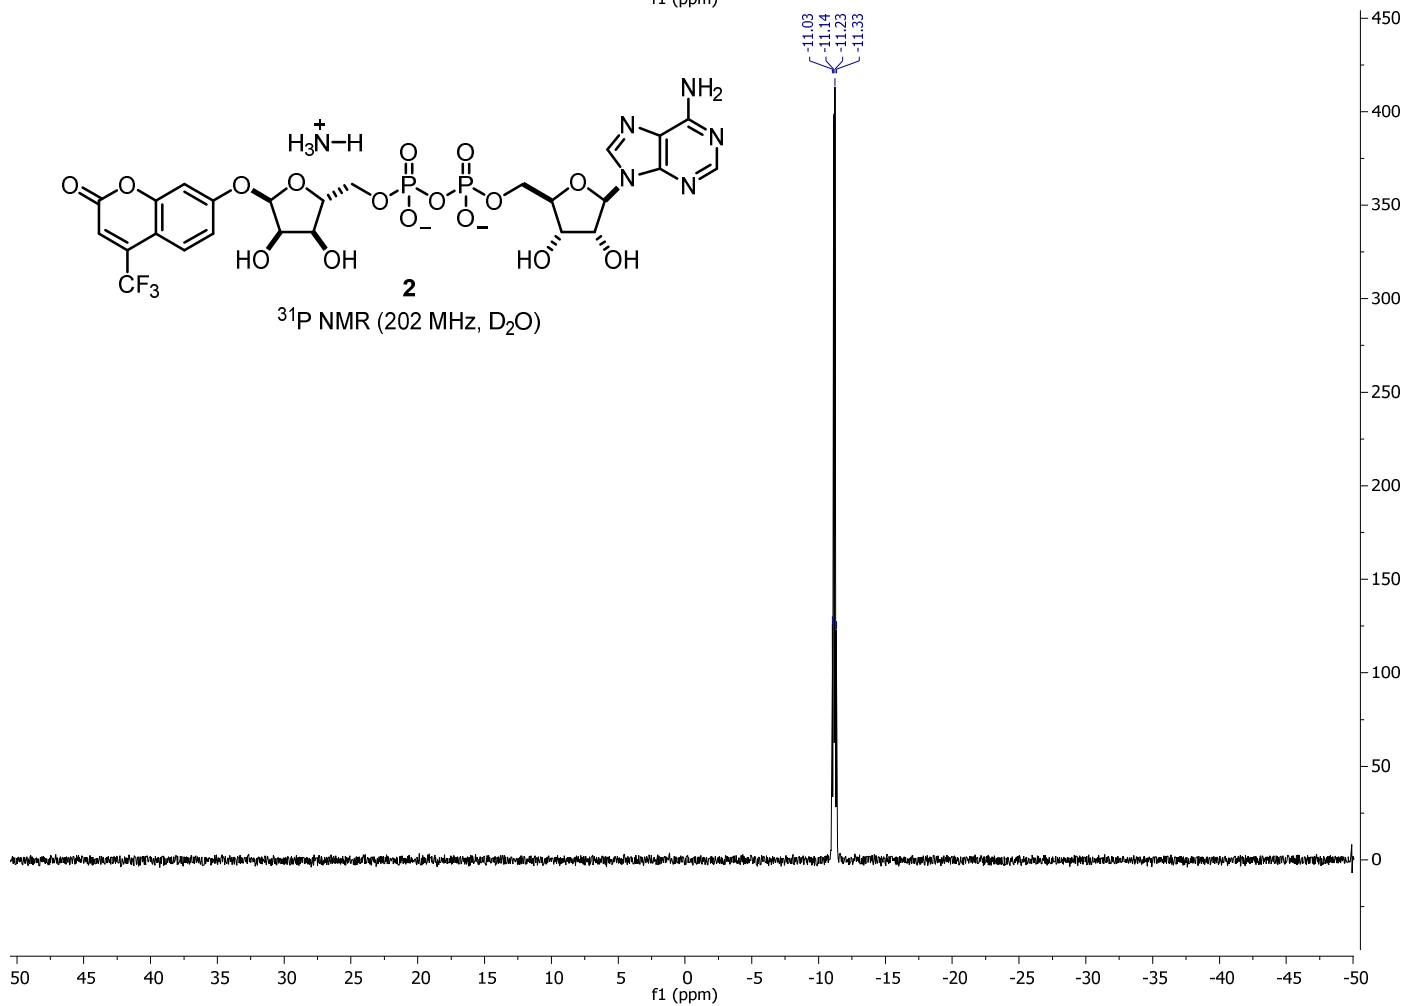

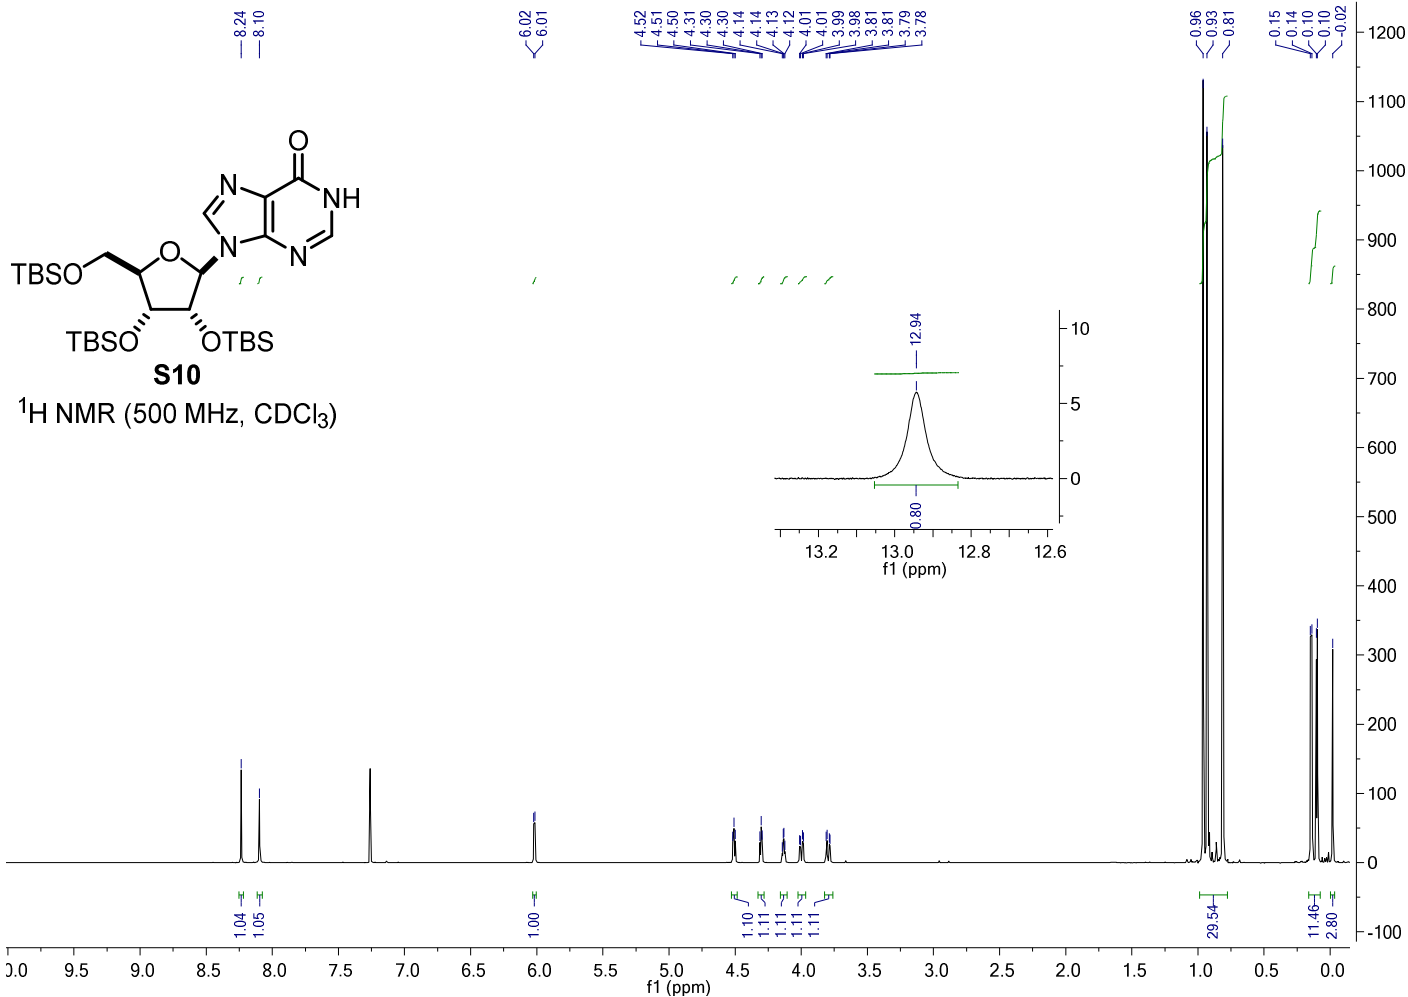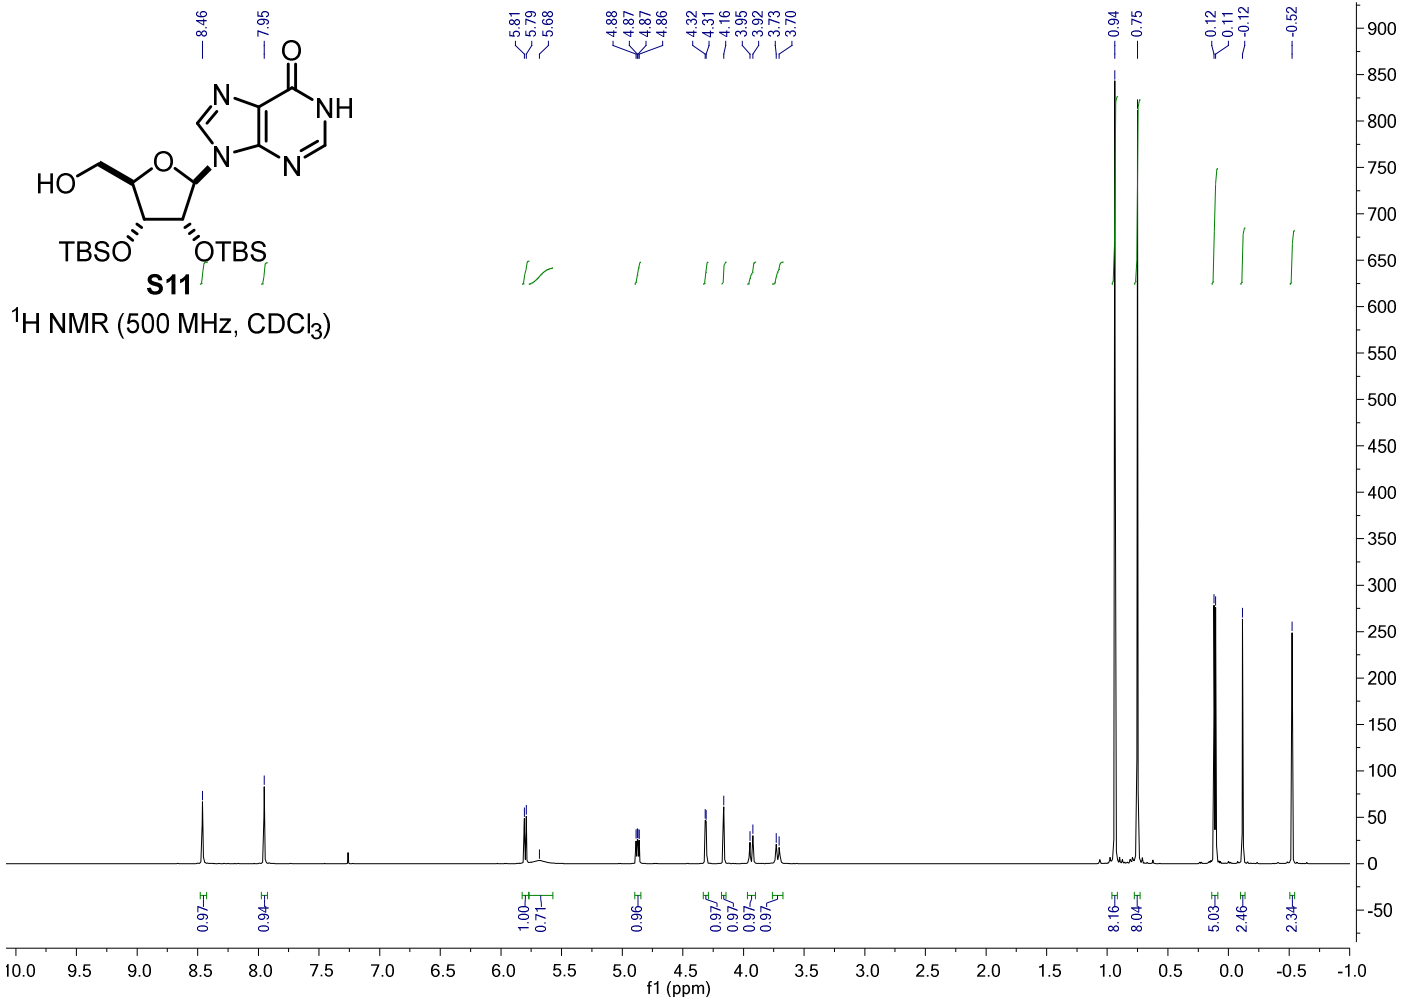

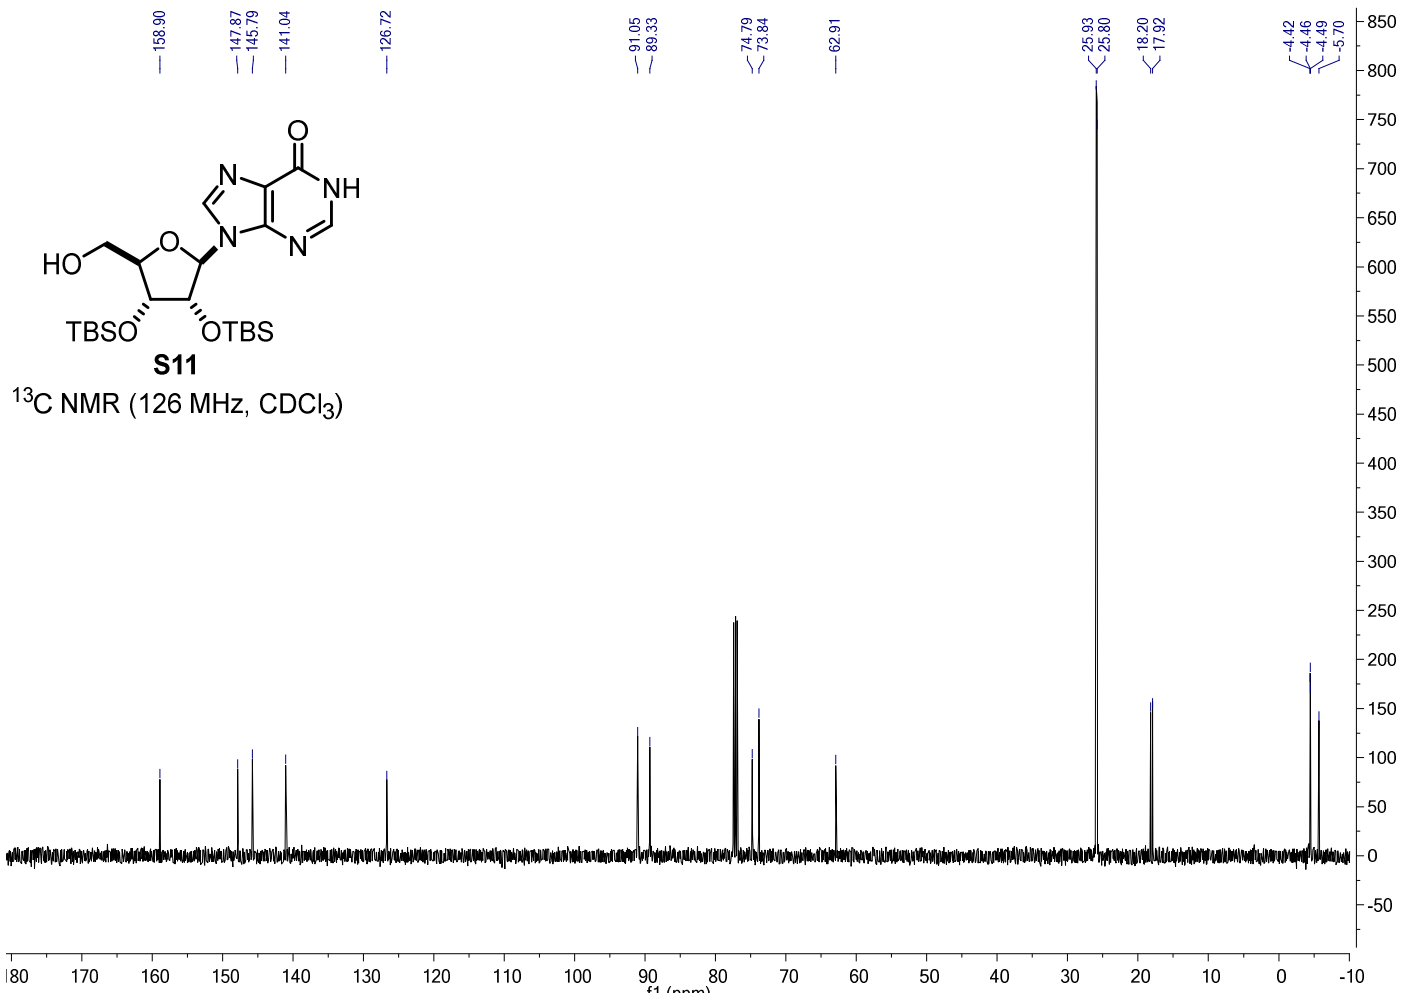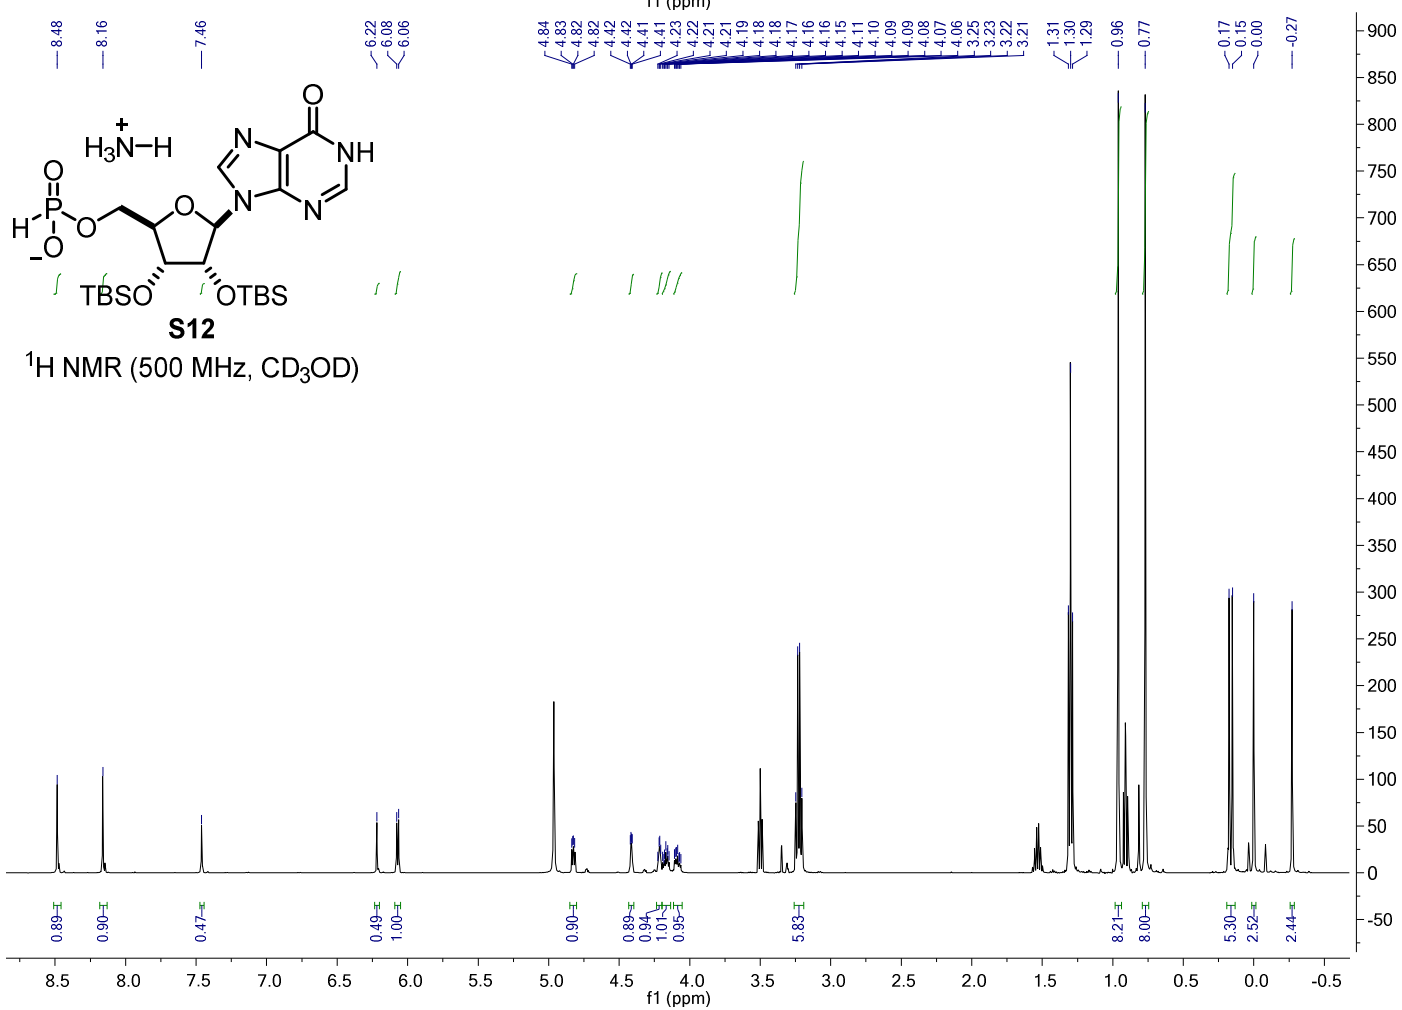

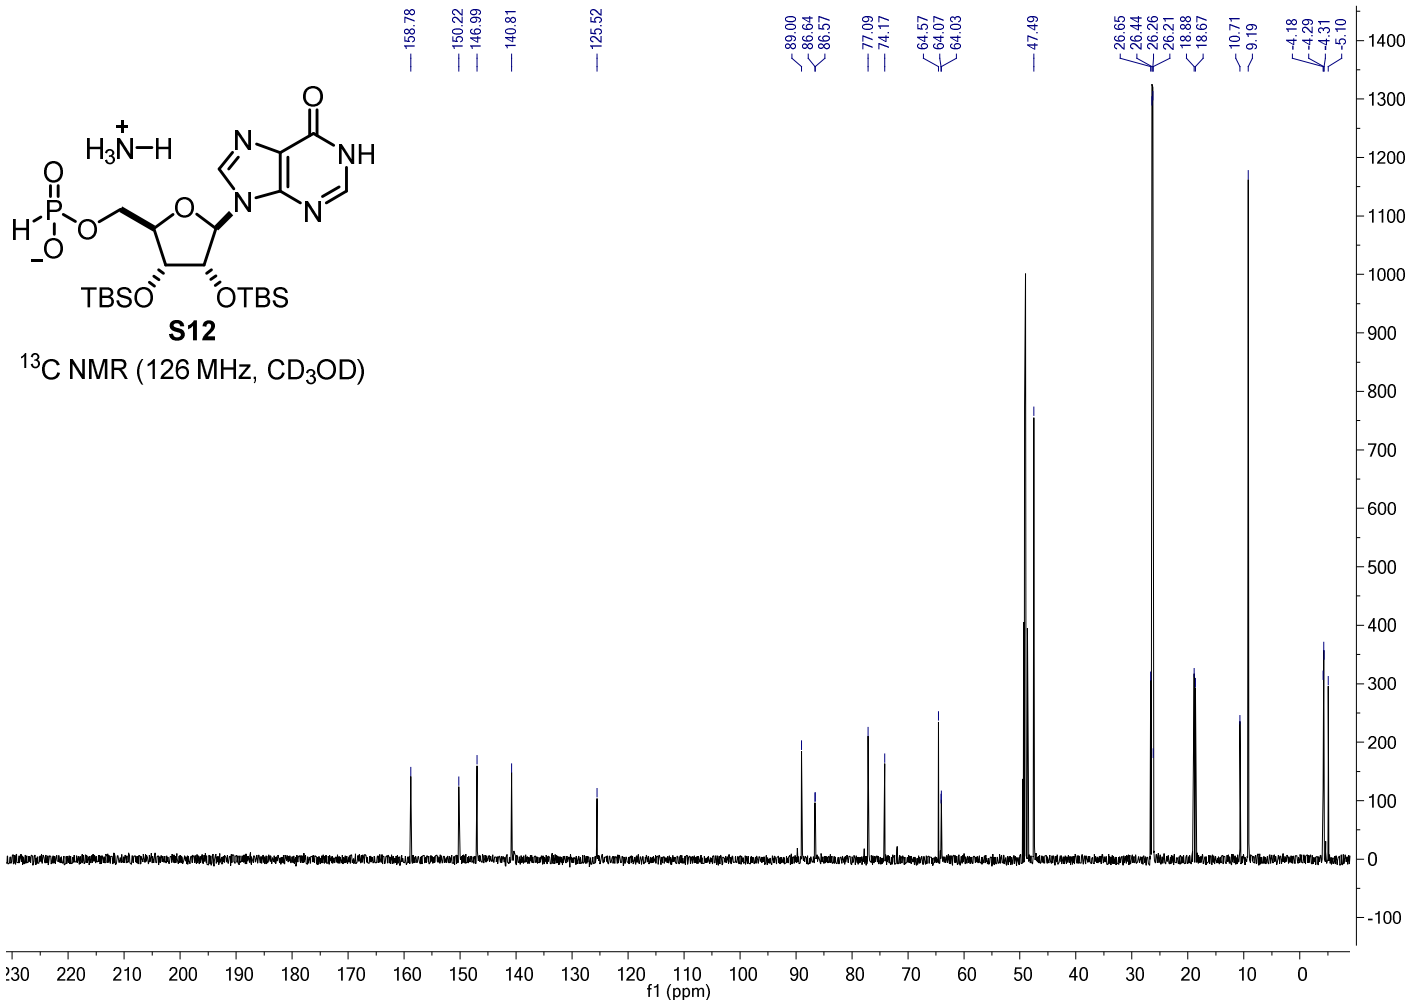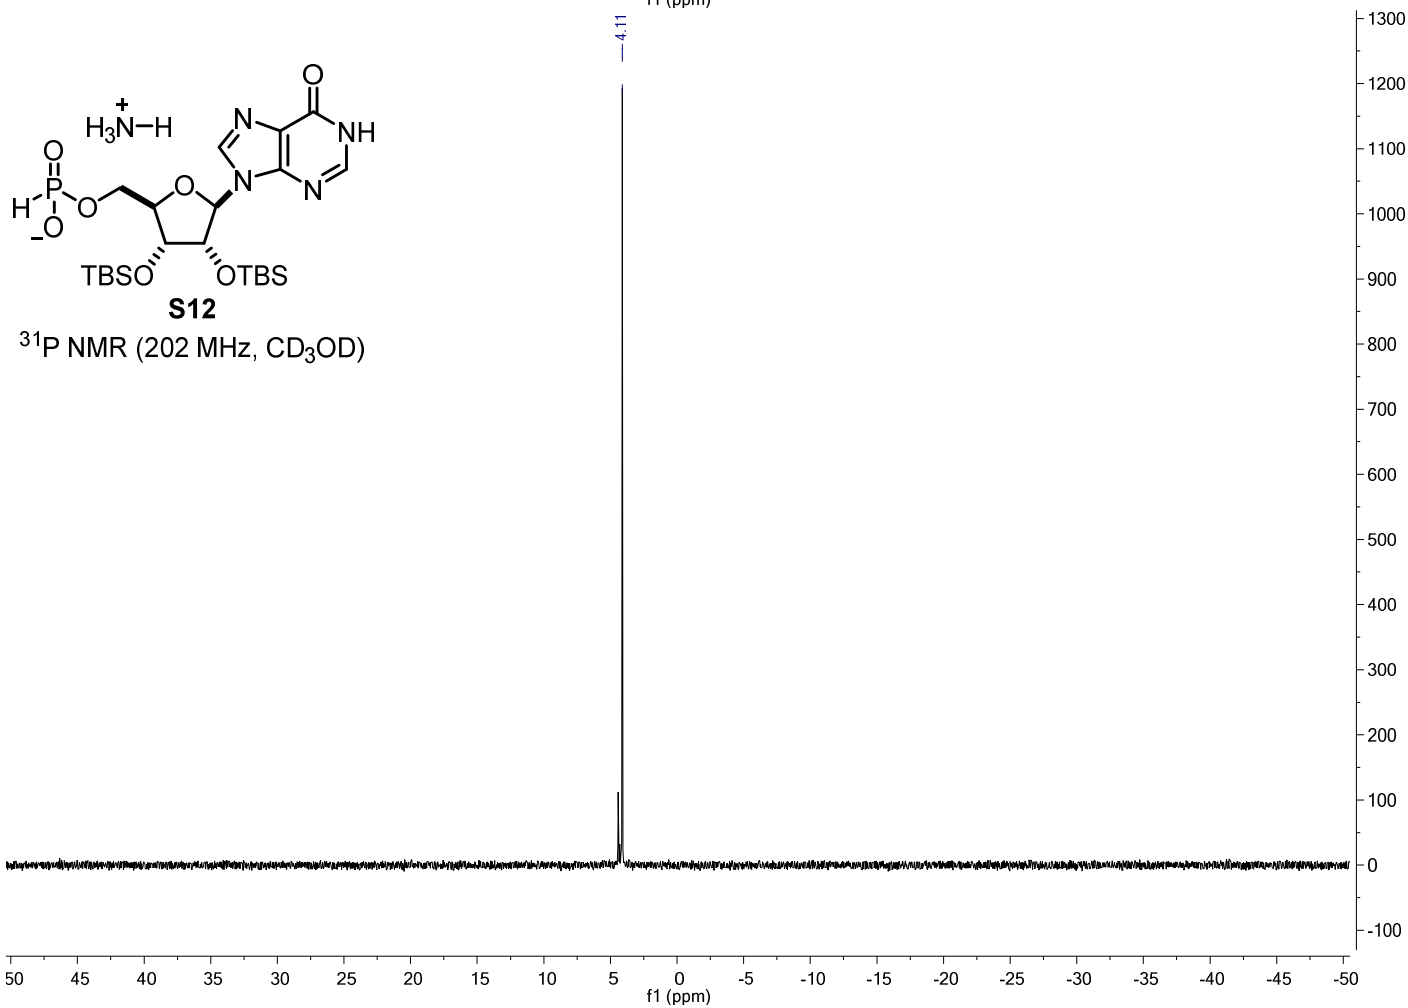

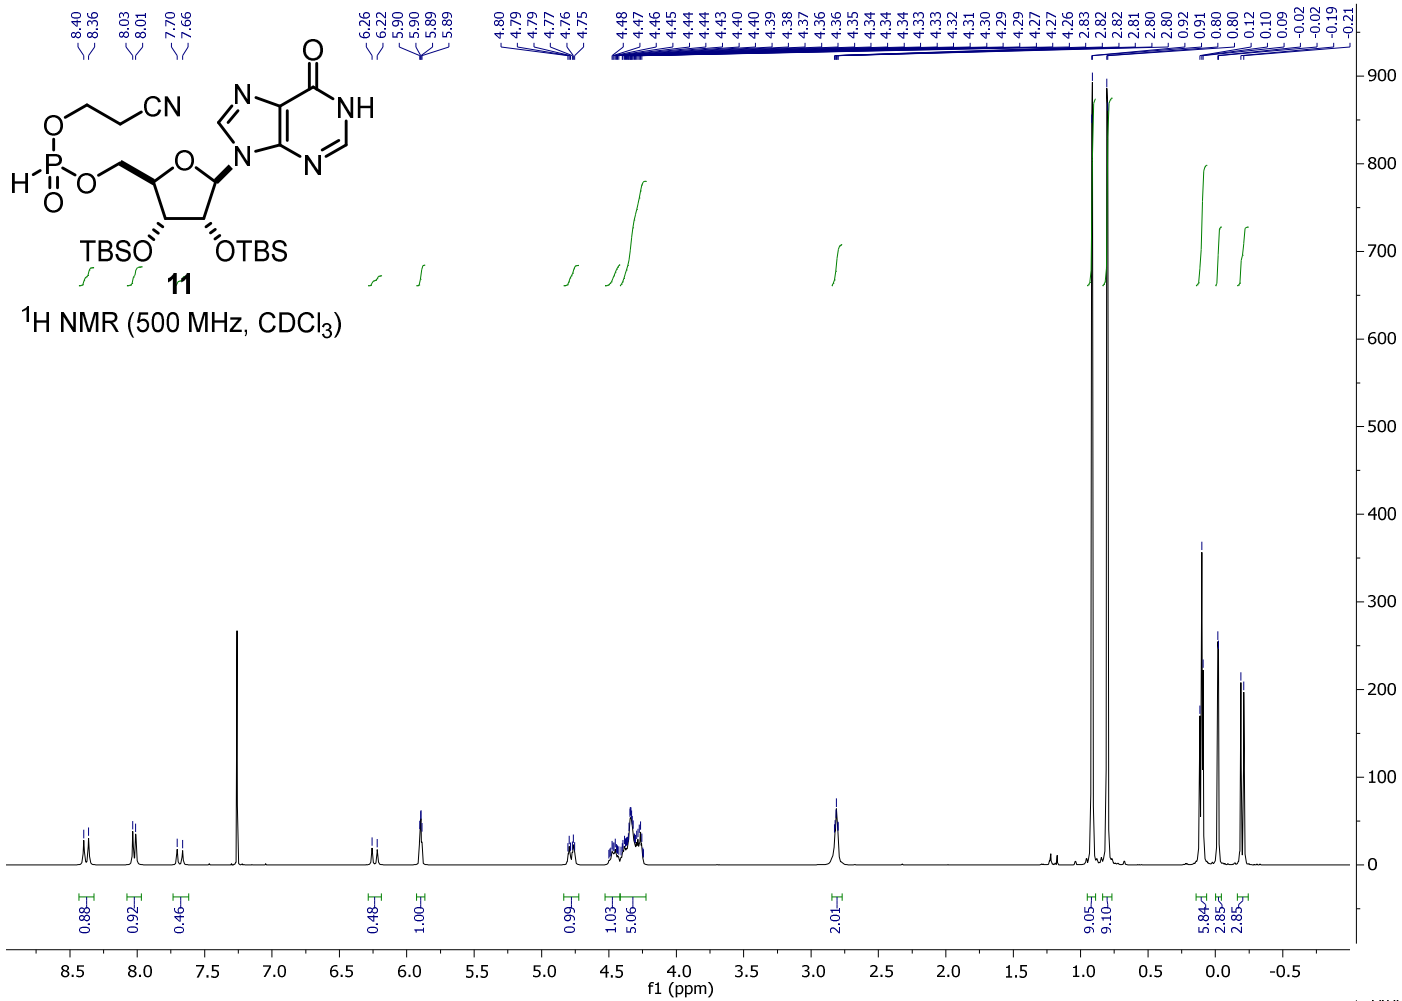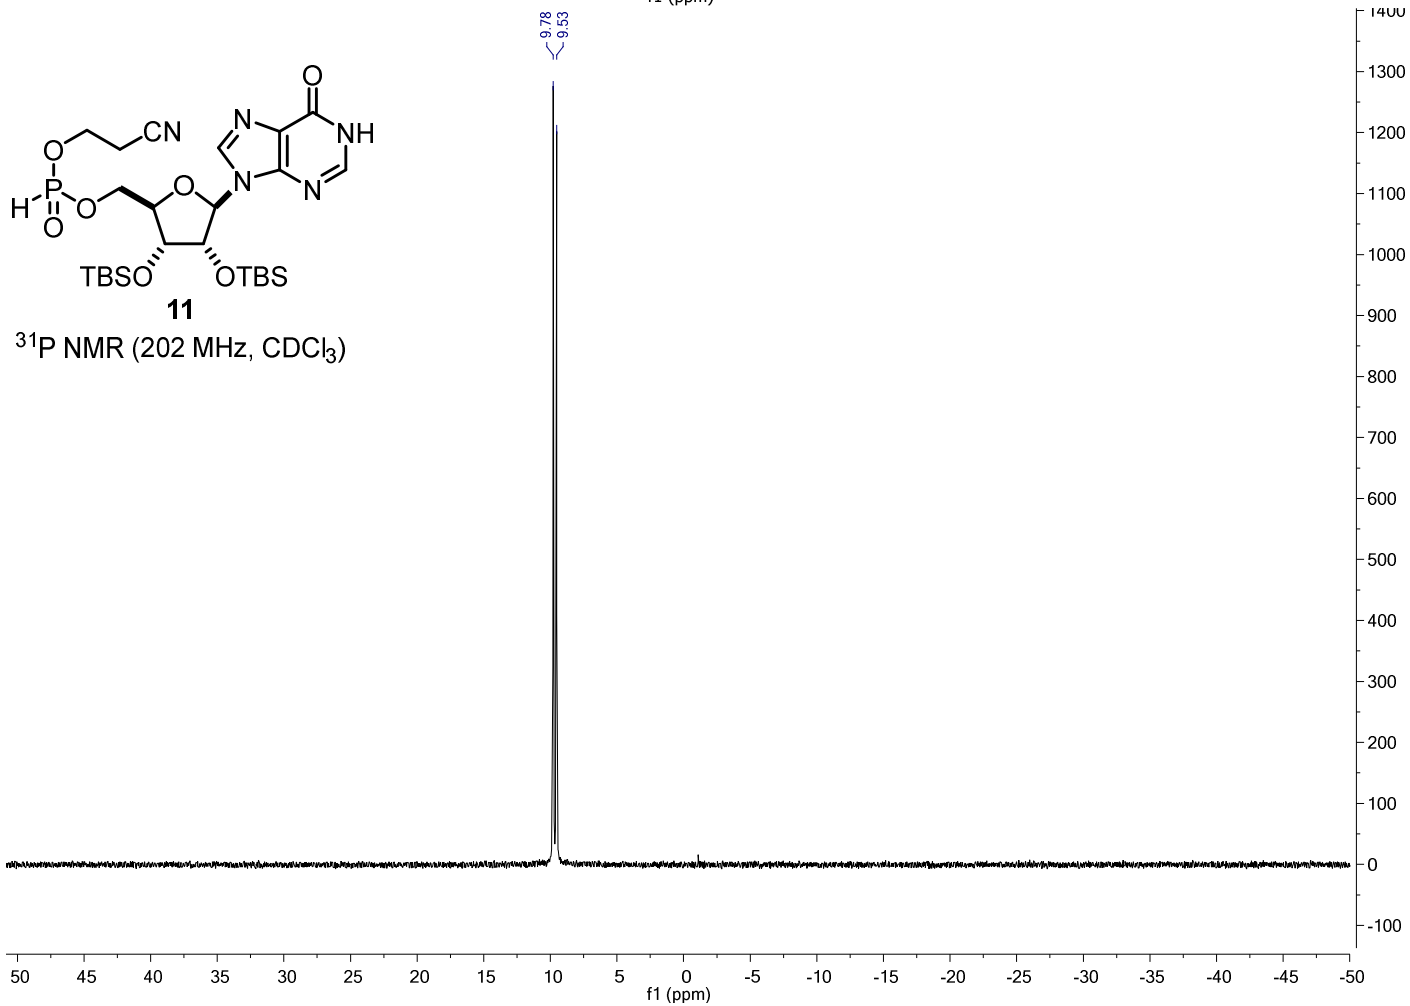

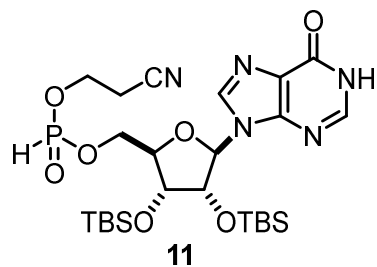

**11**  
<sup>13</sup>C NMR (126 MHz, CDCl<sub>3</sub>)

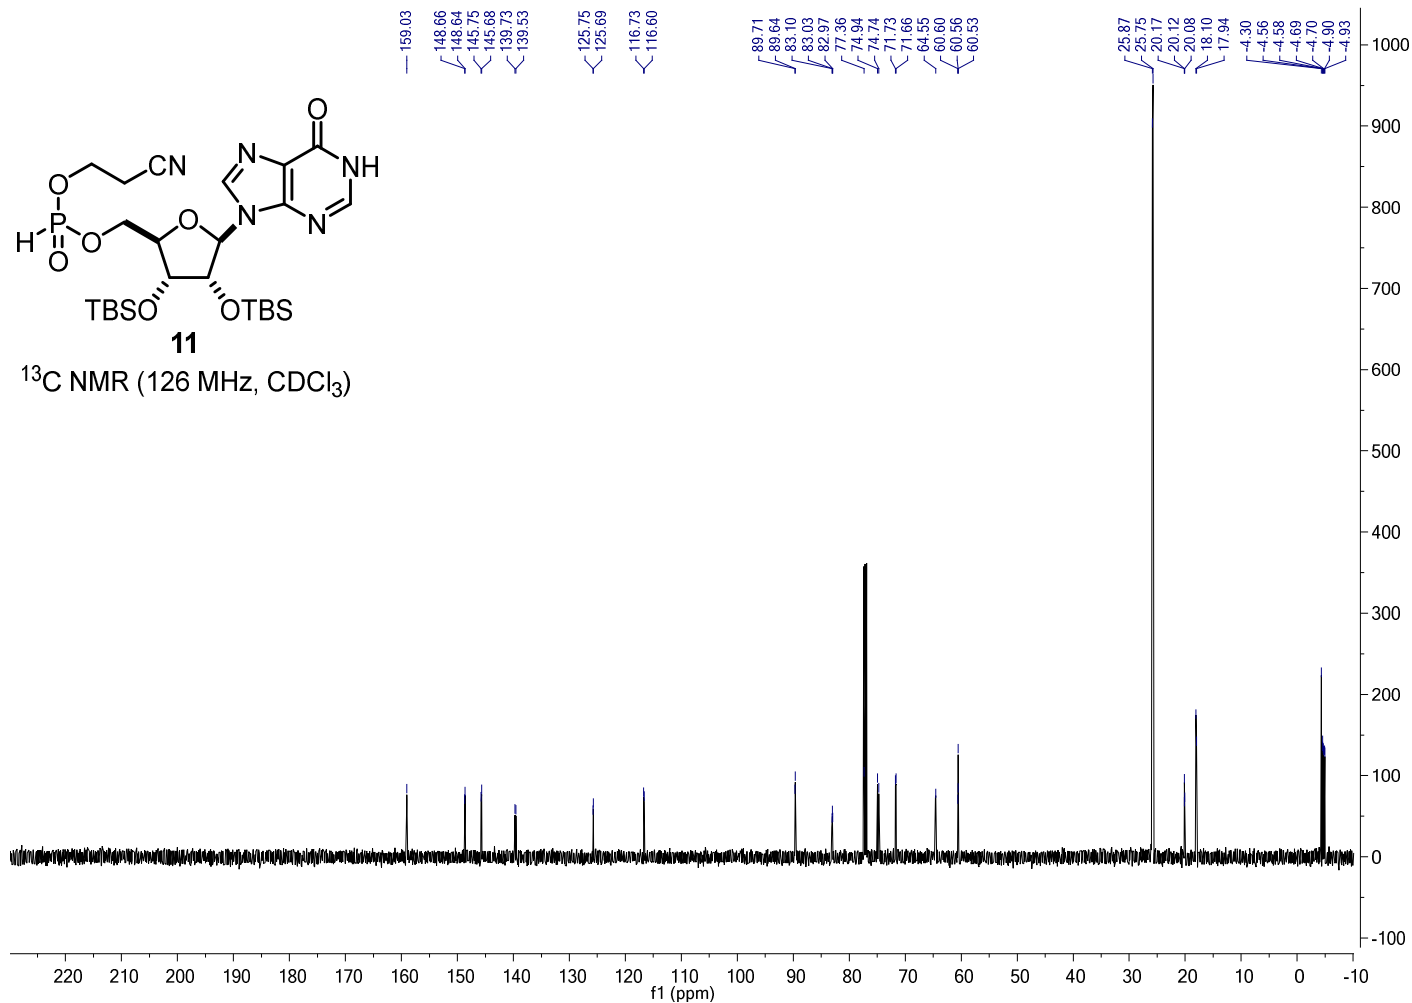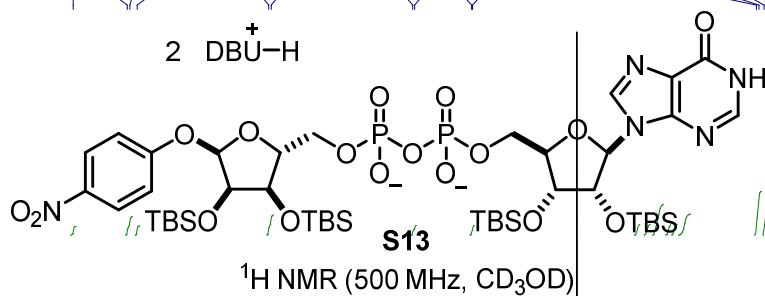

**S13**  
<sup>1</sup>H NMR (500 MHz, CD<sub>3</sub>OD)

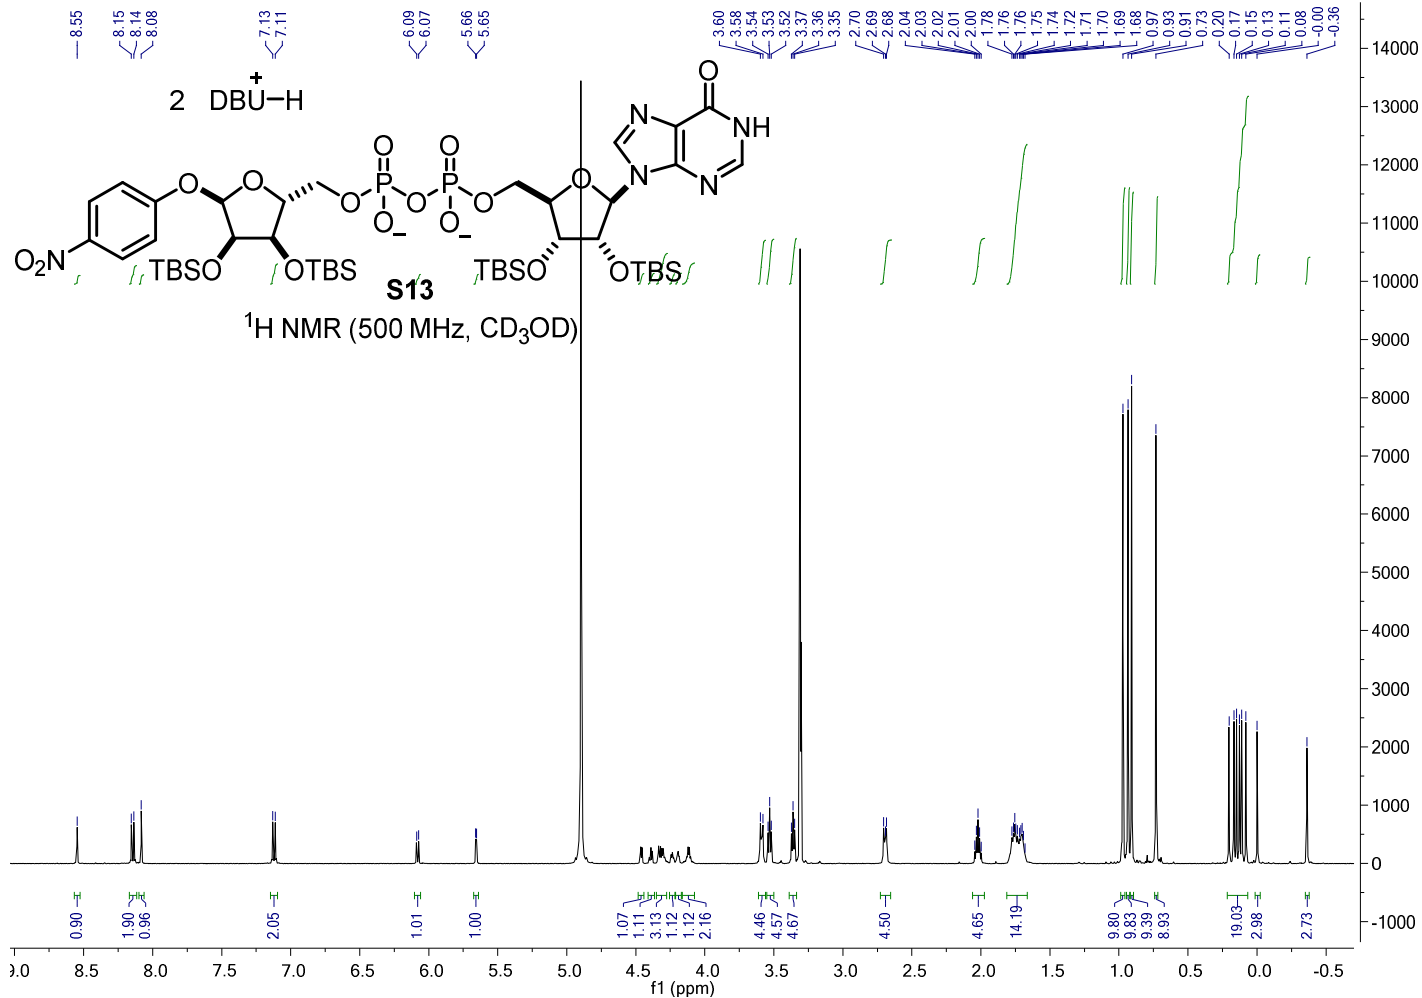

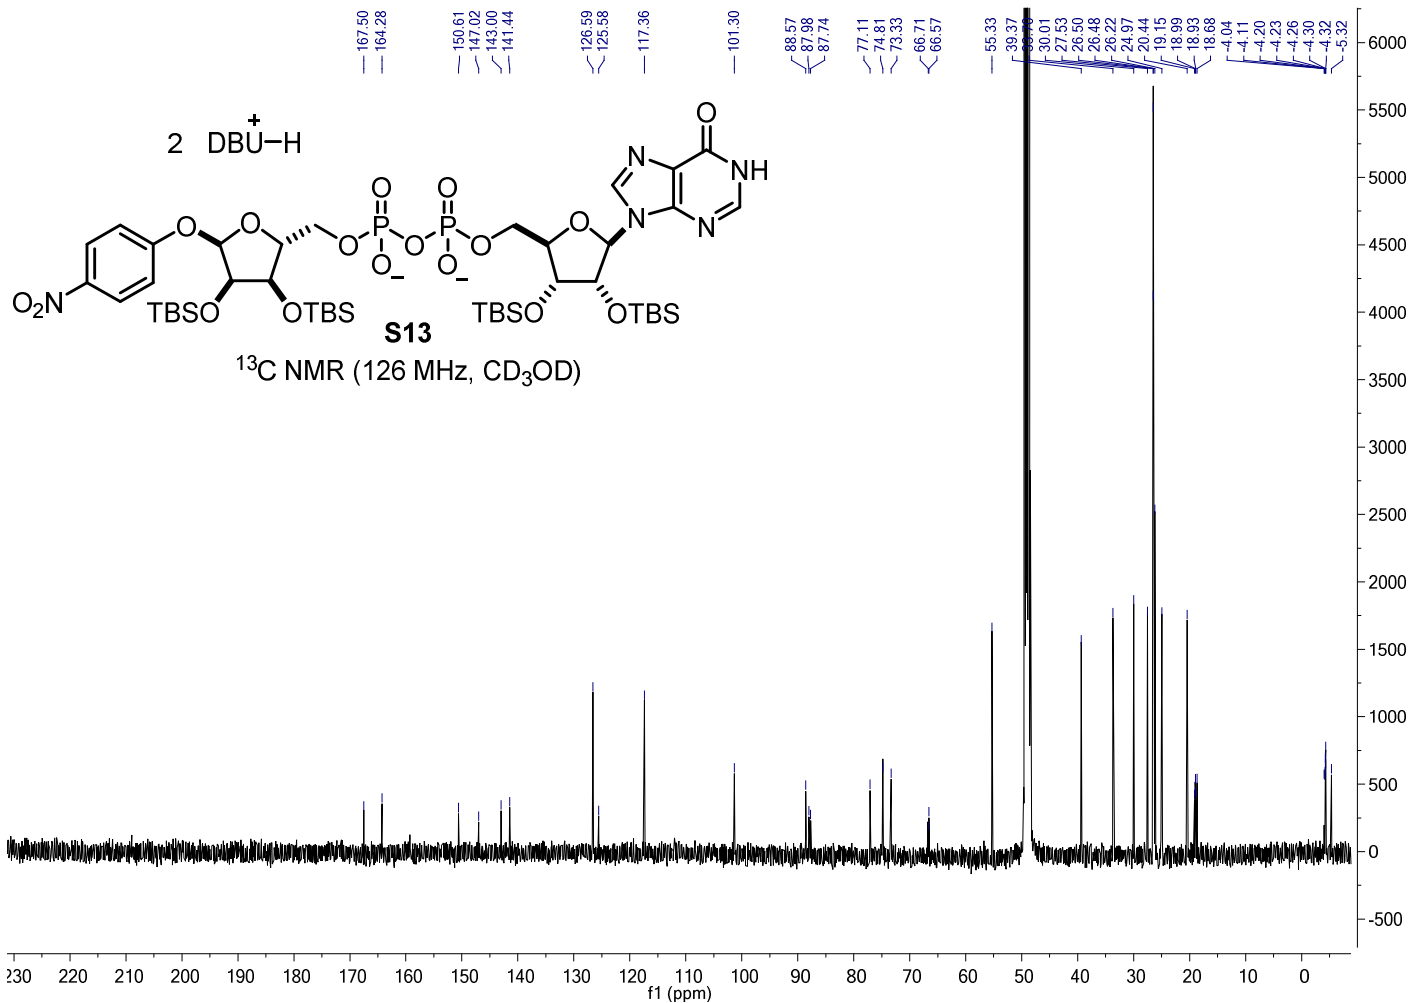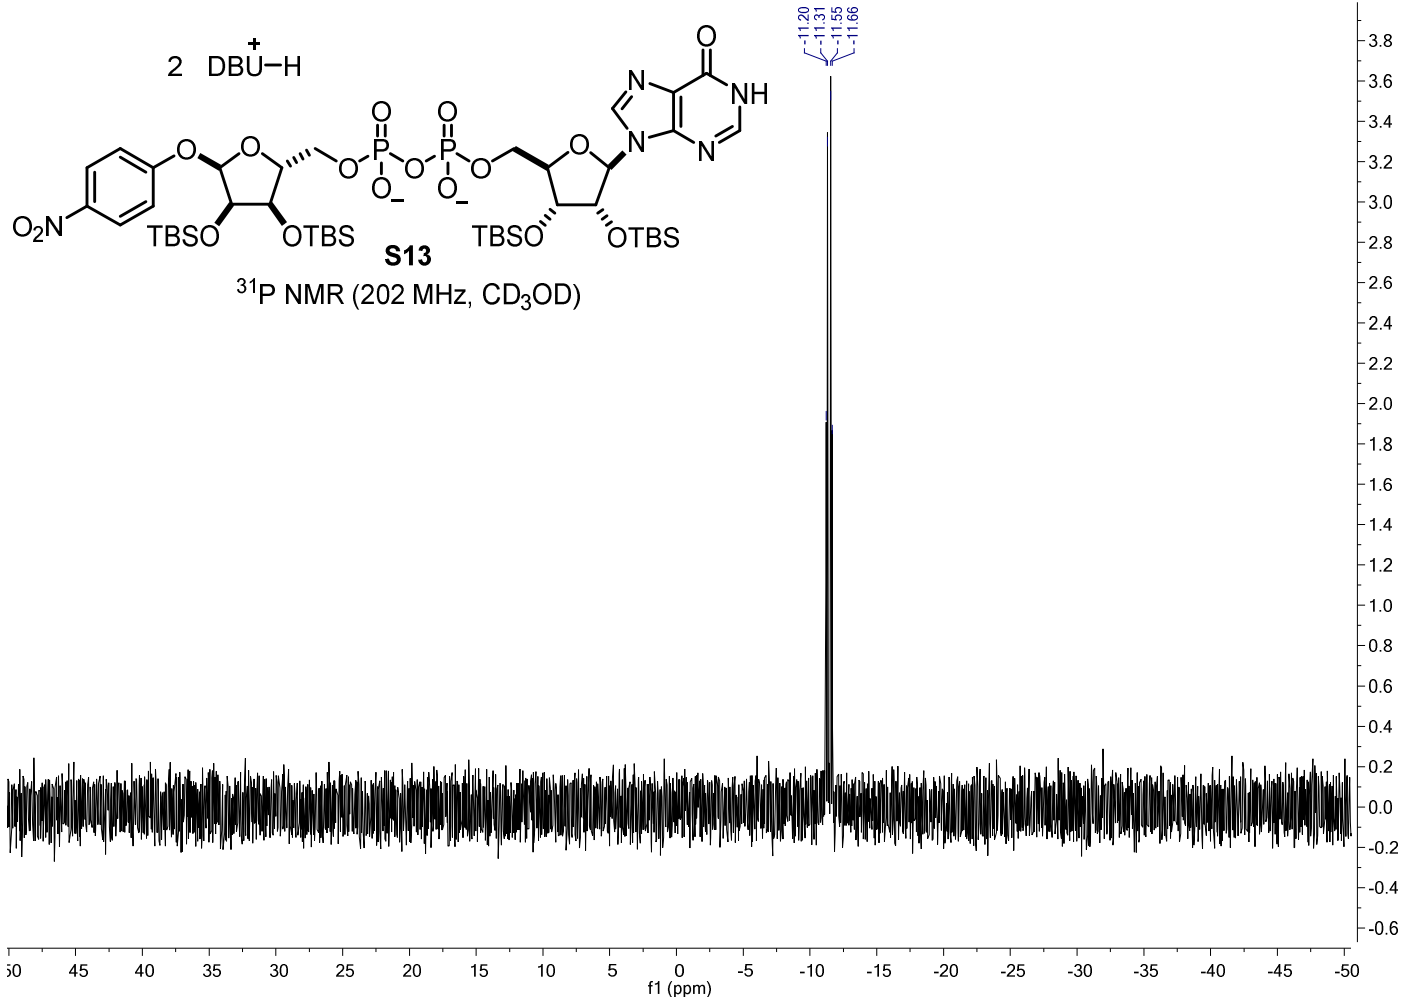



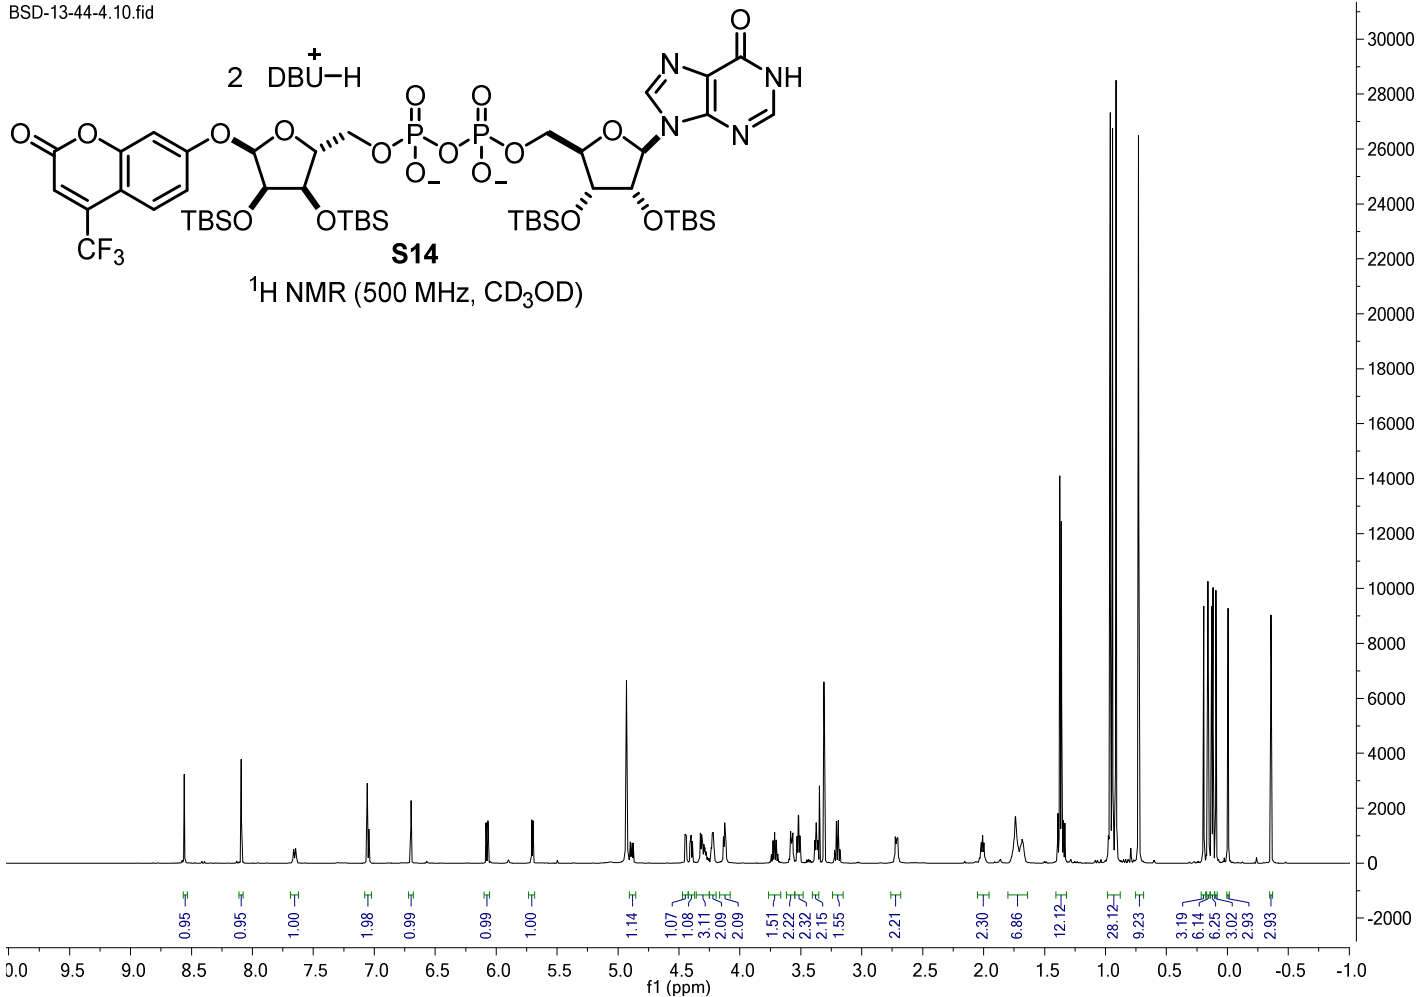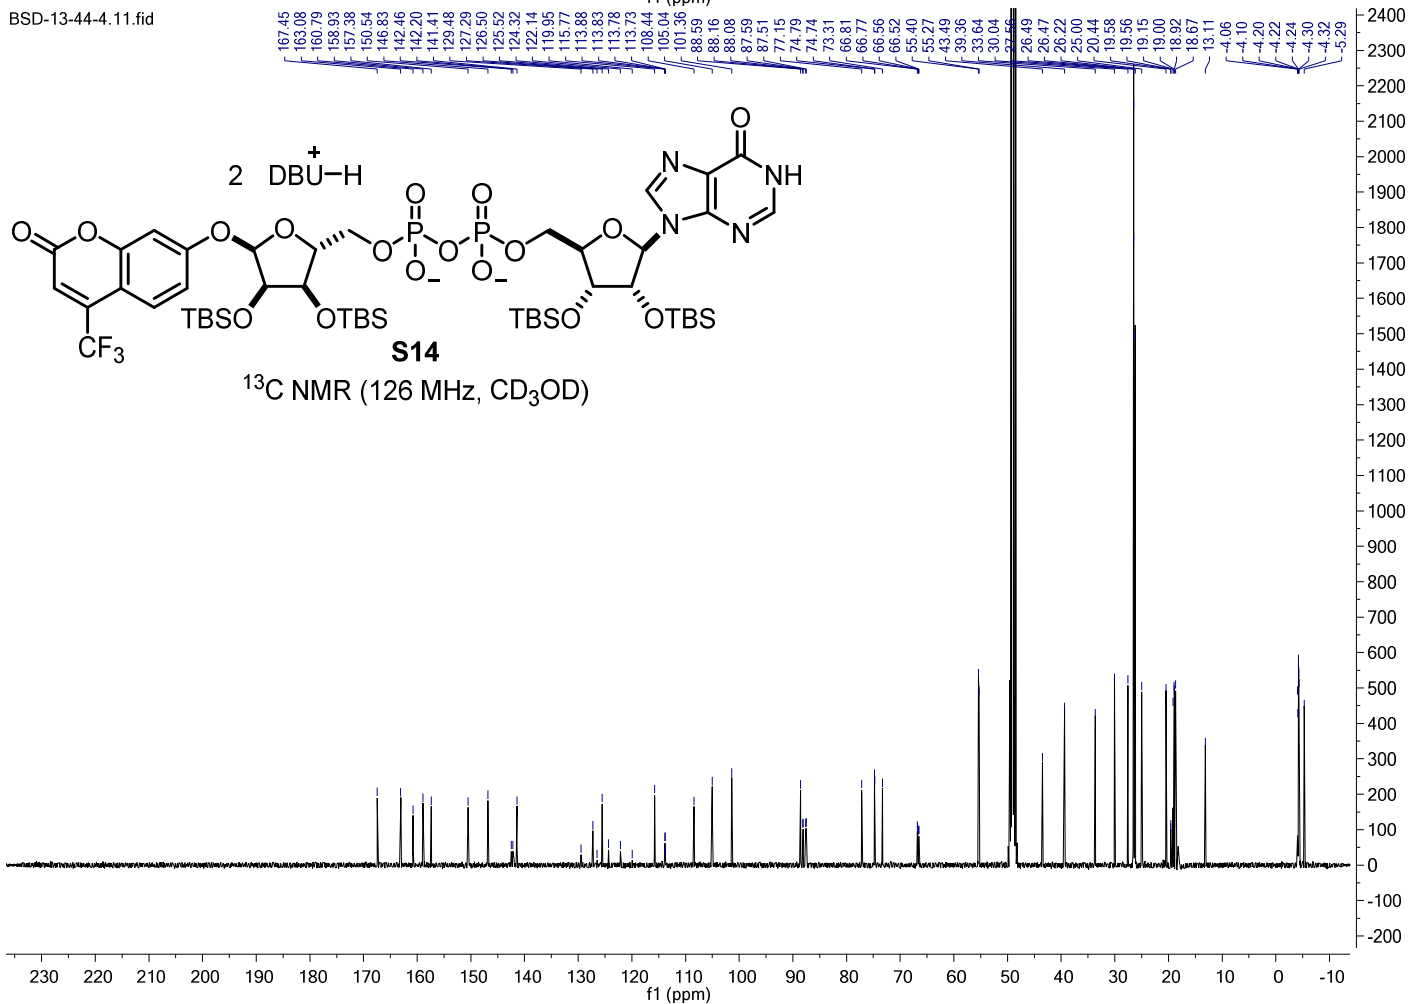

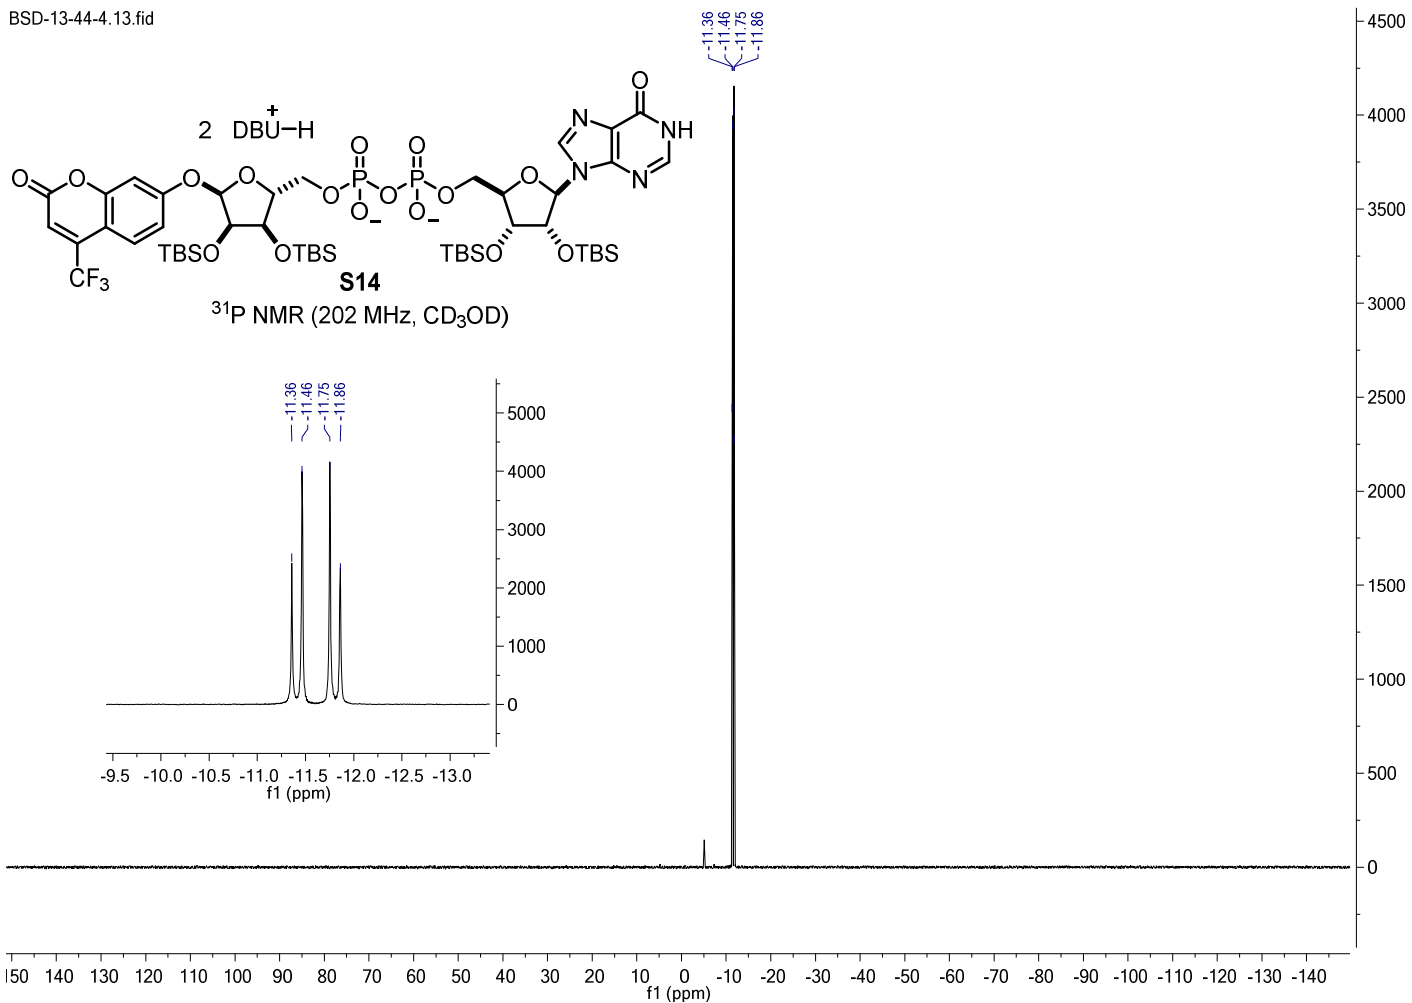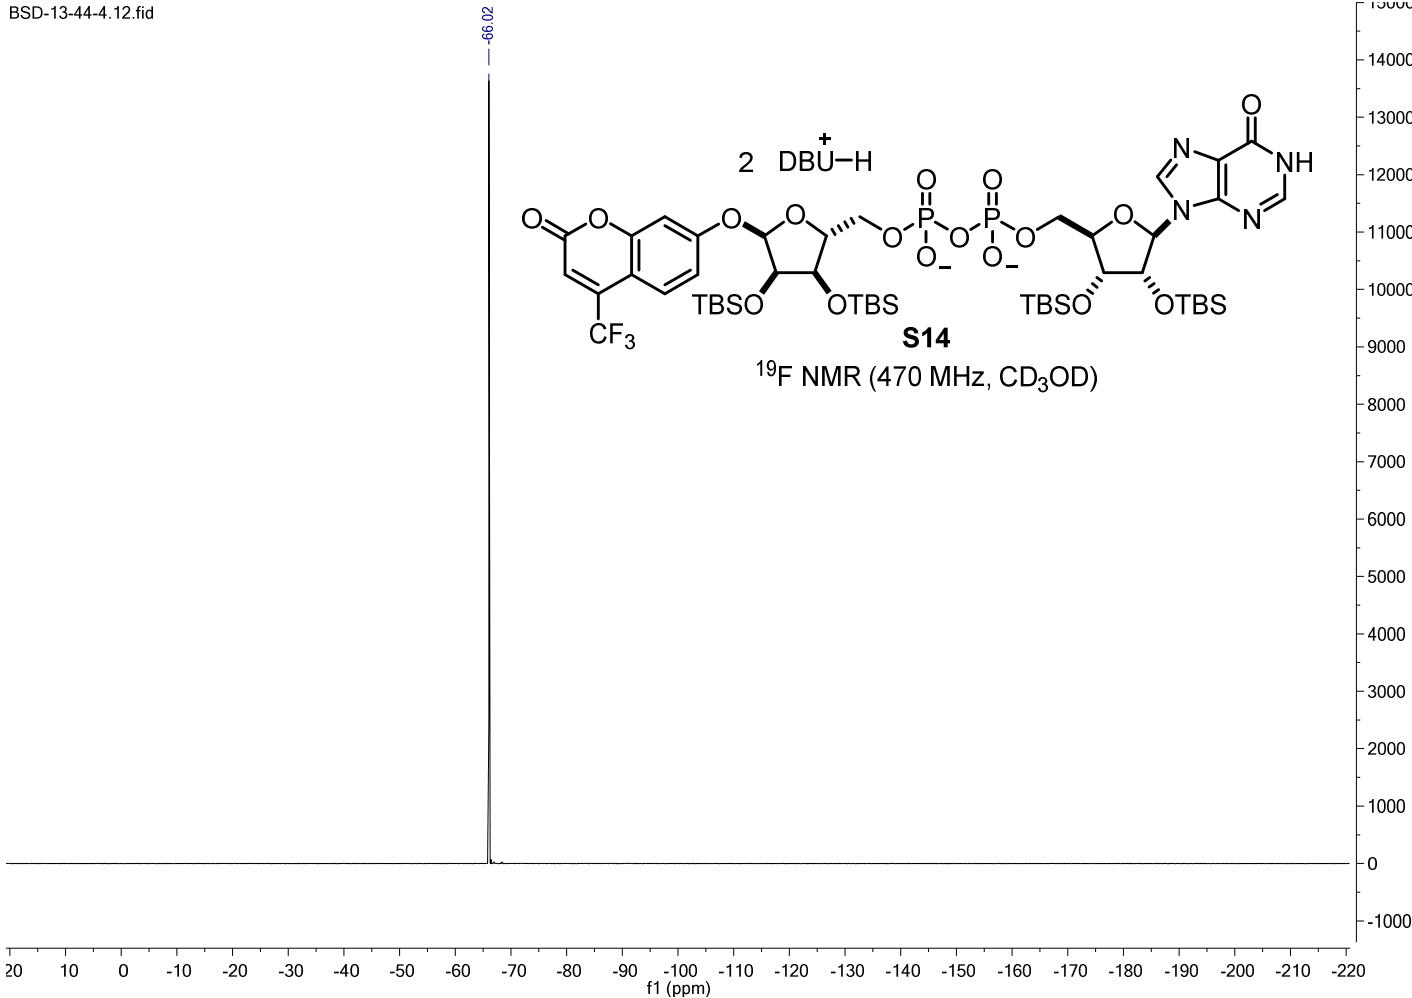

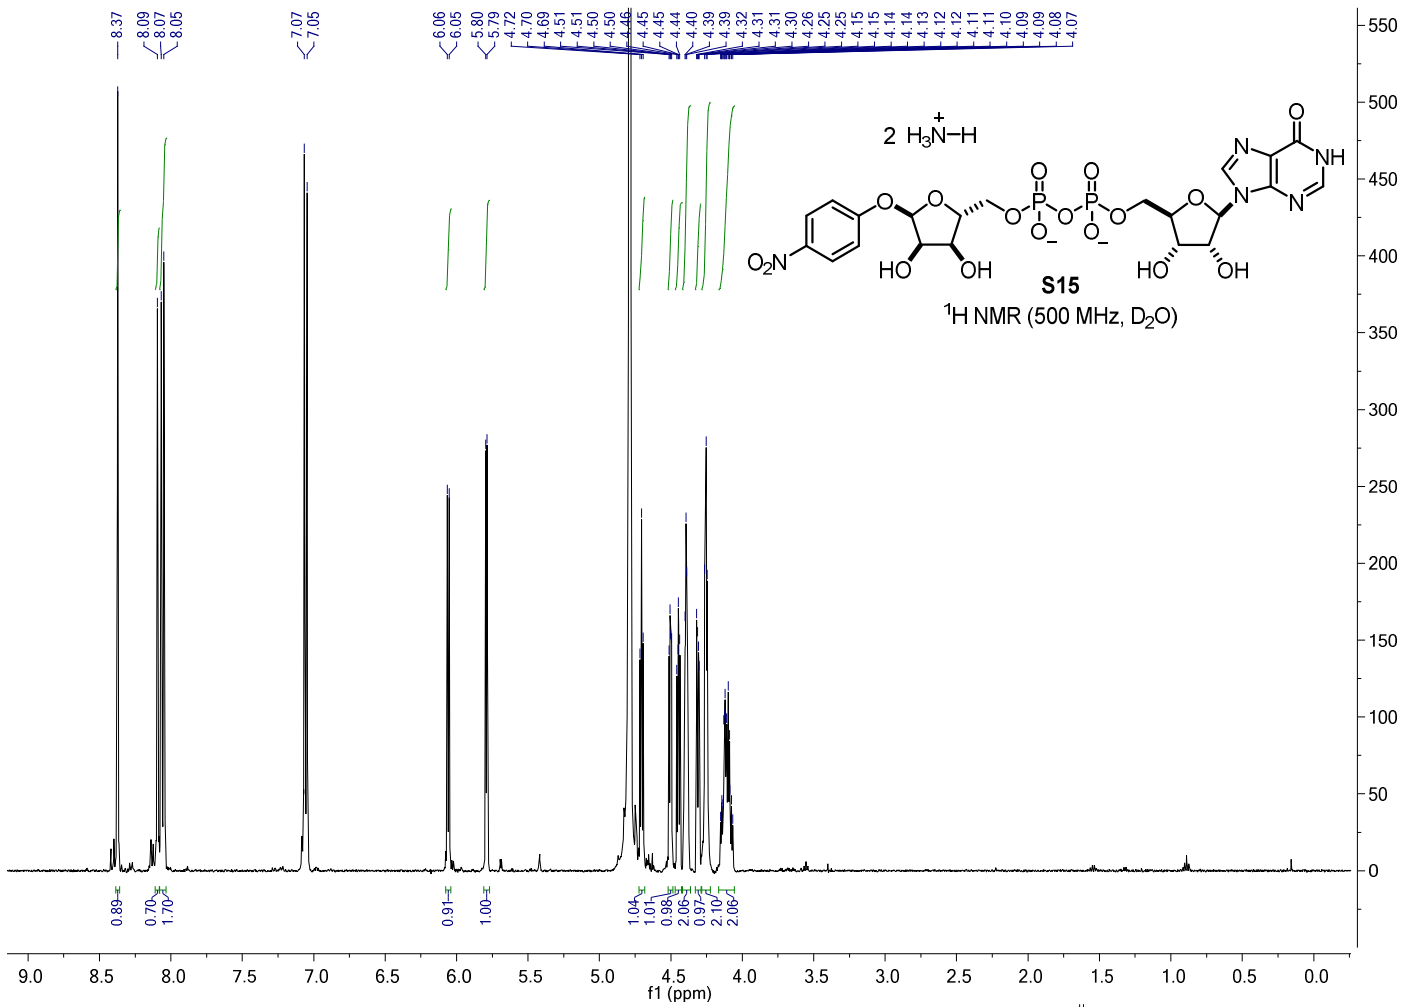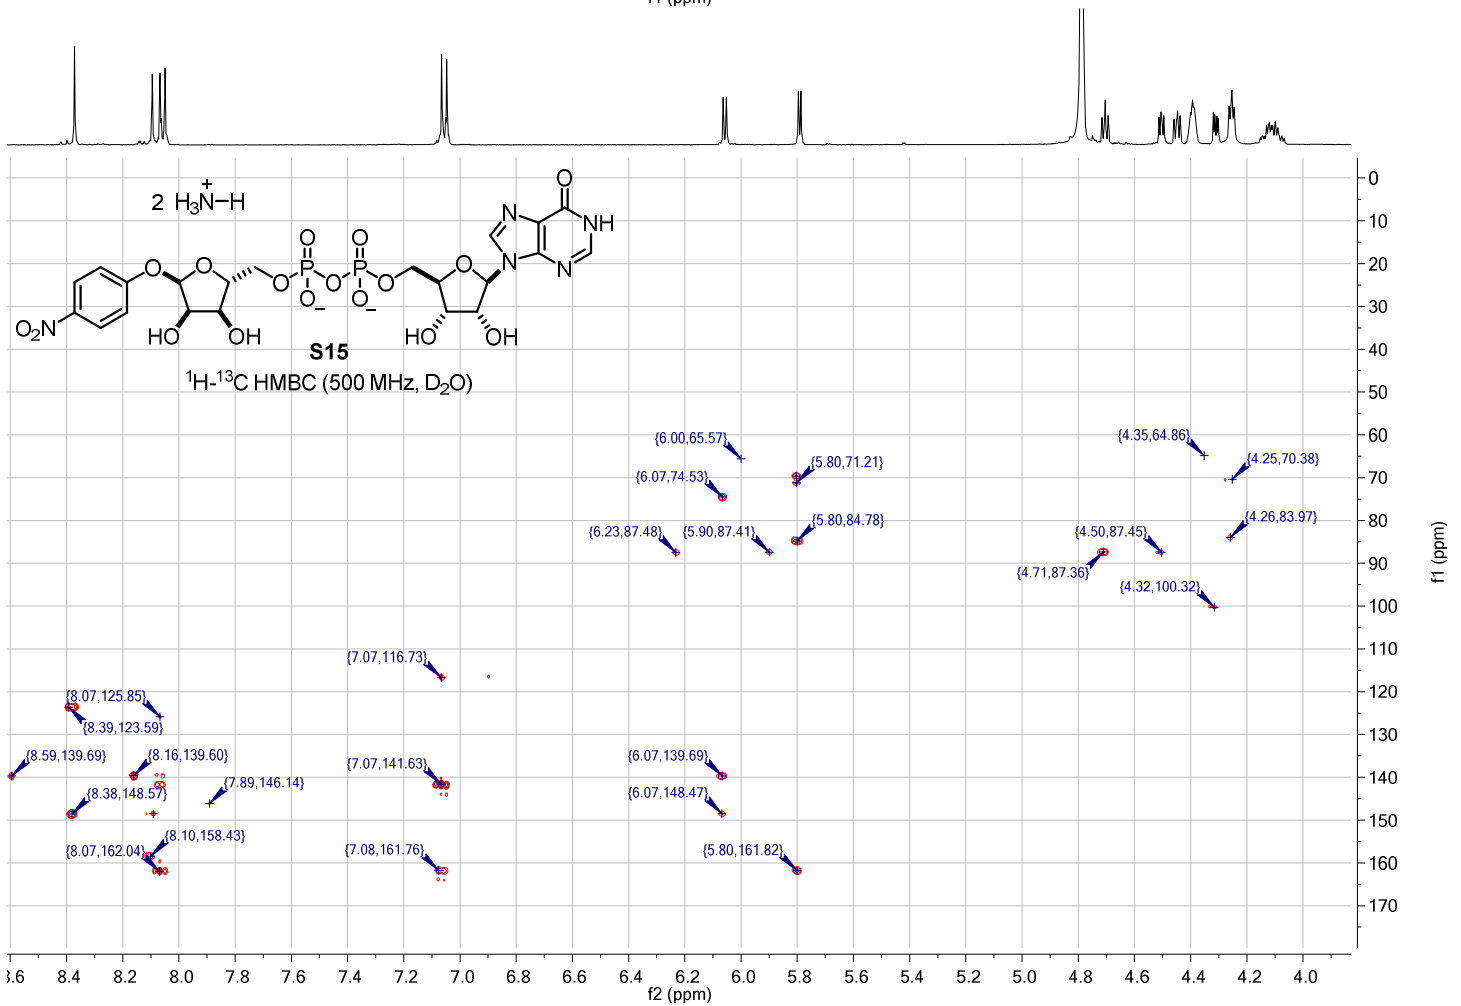

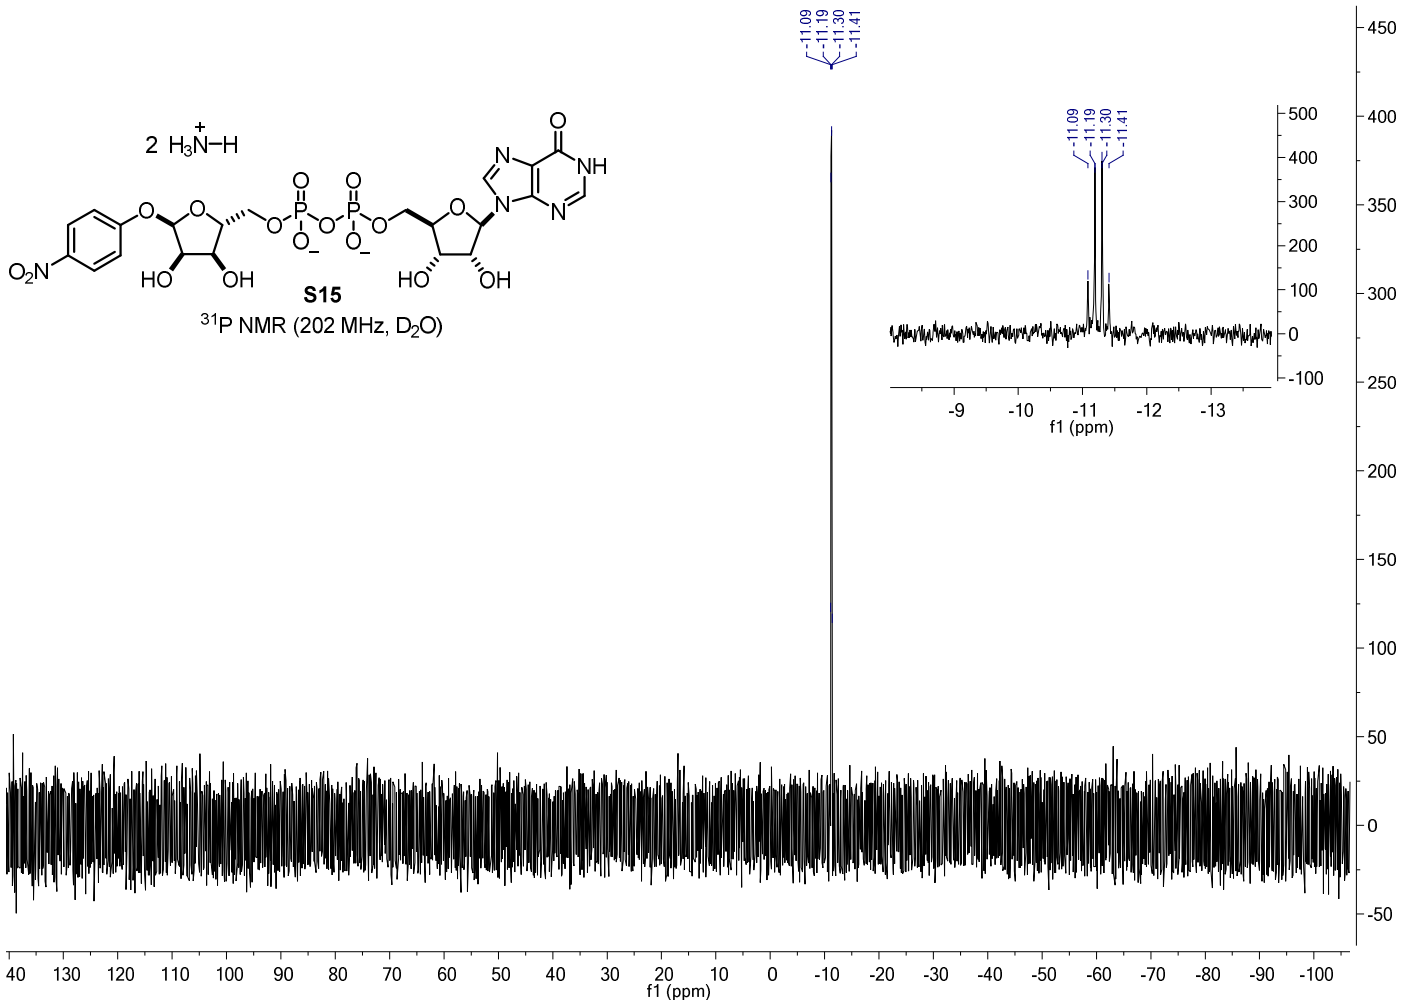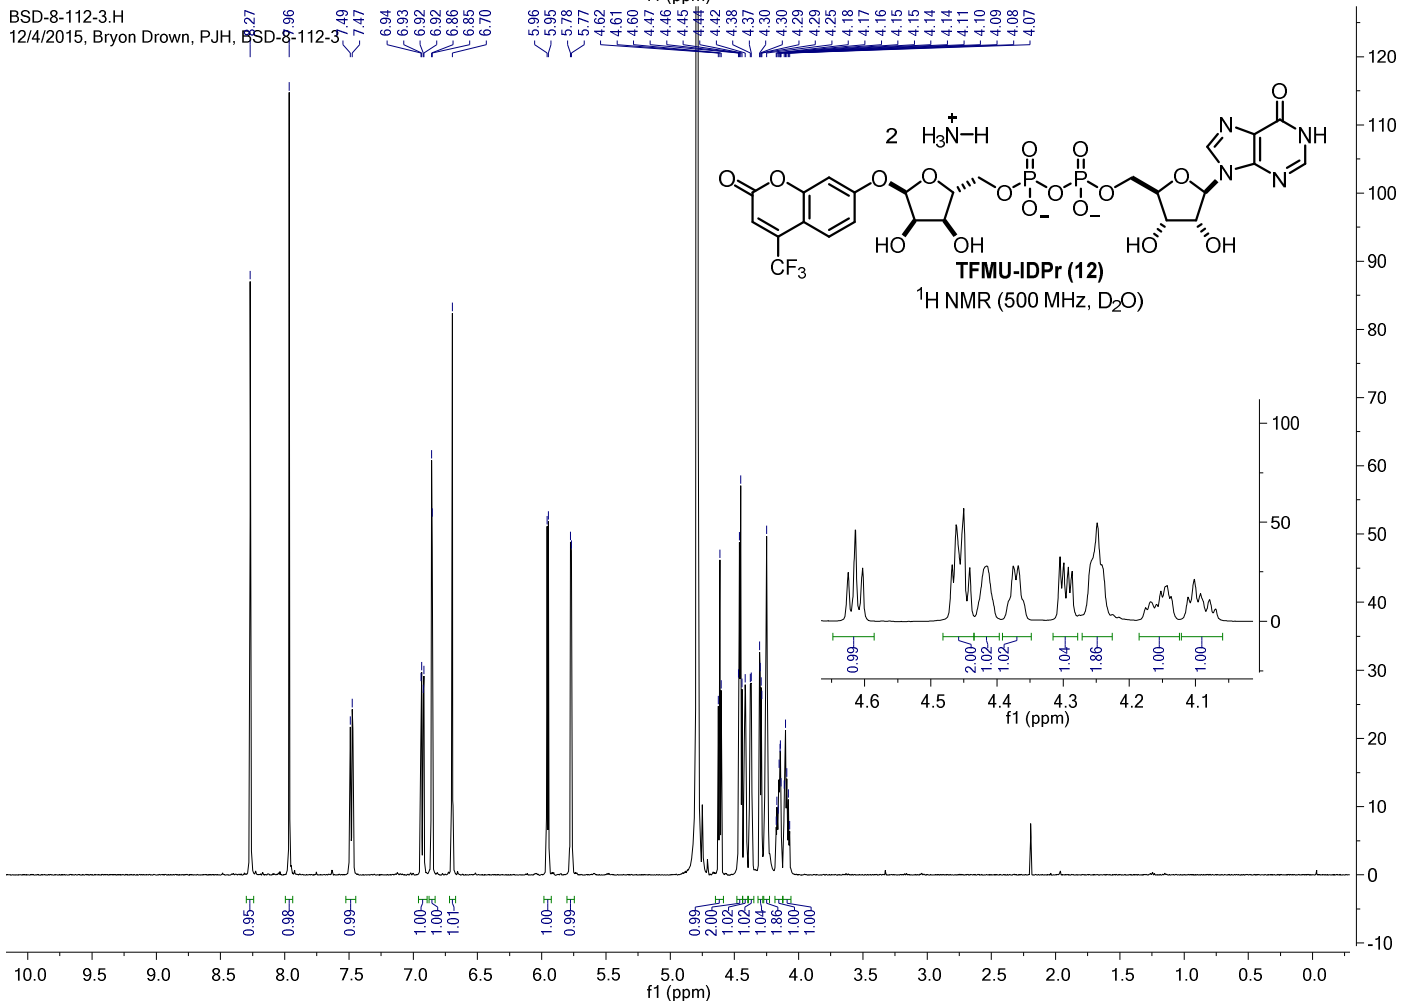

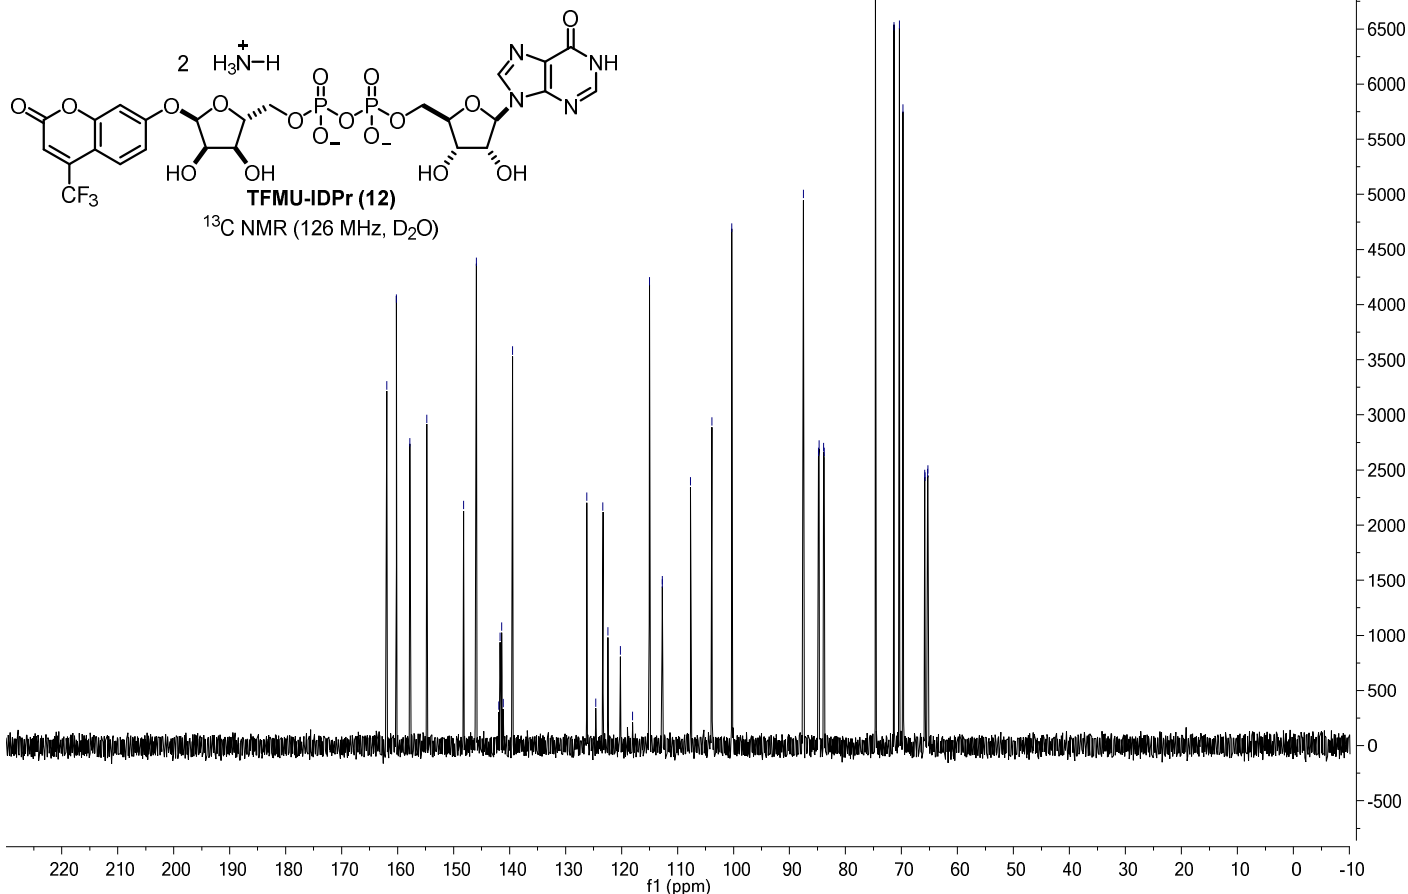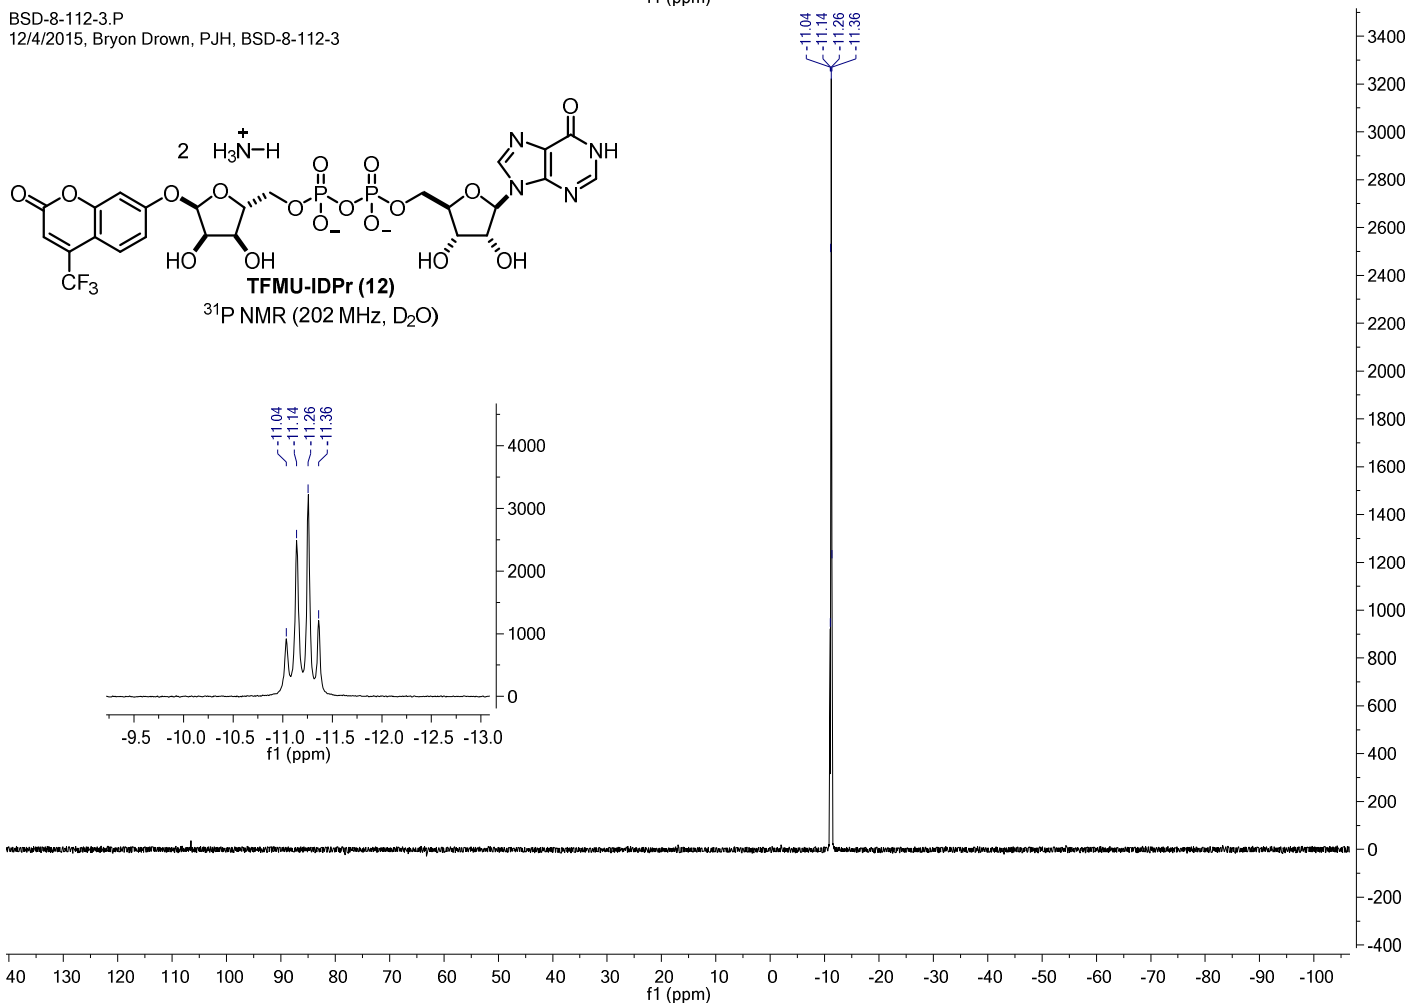

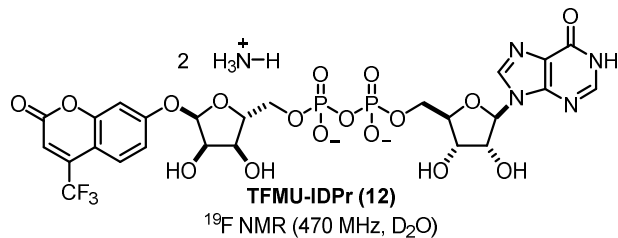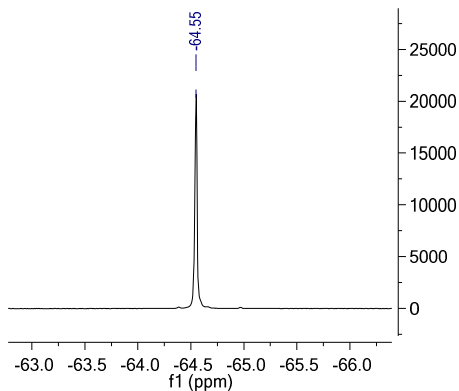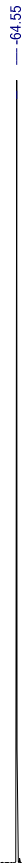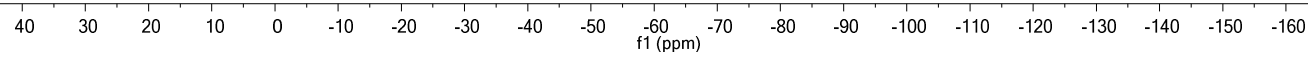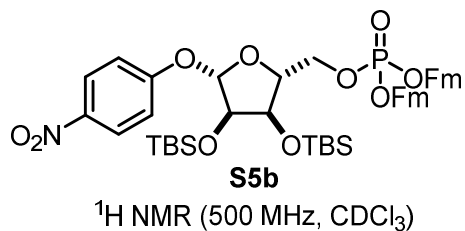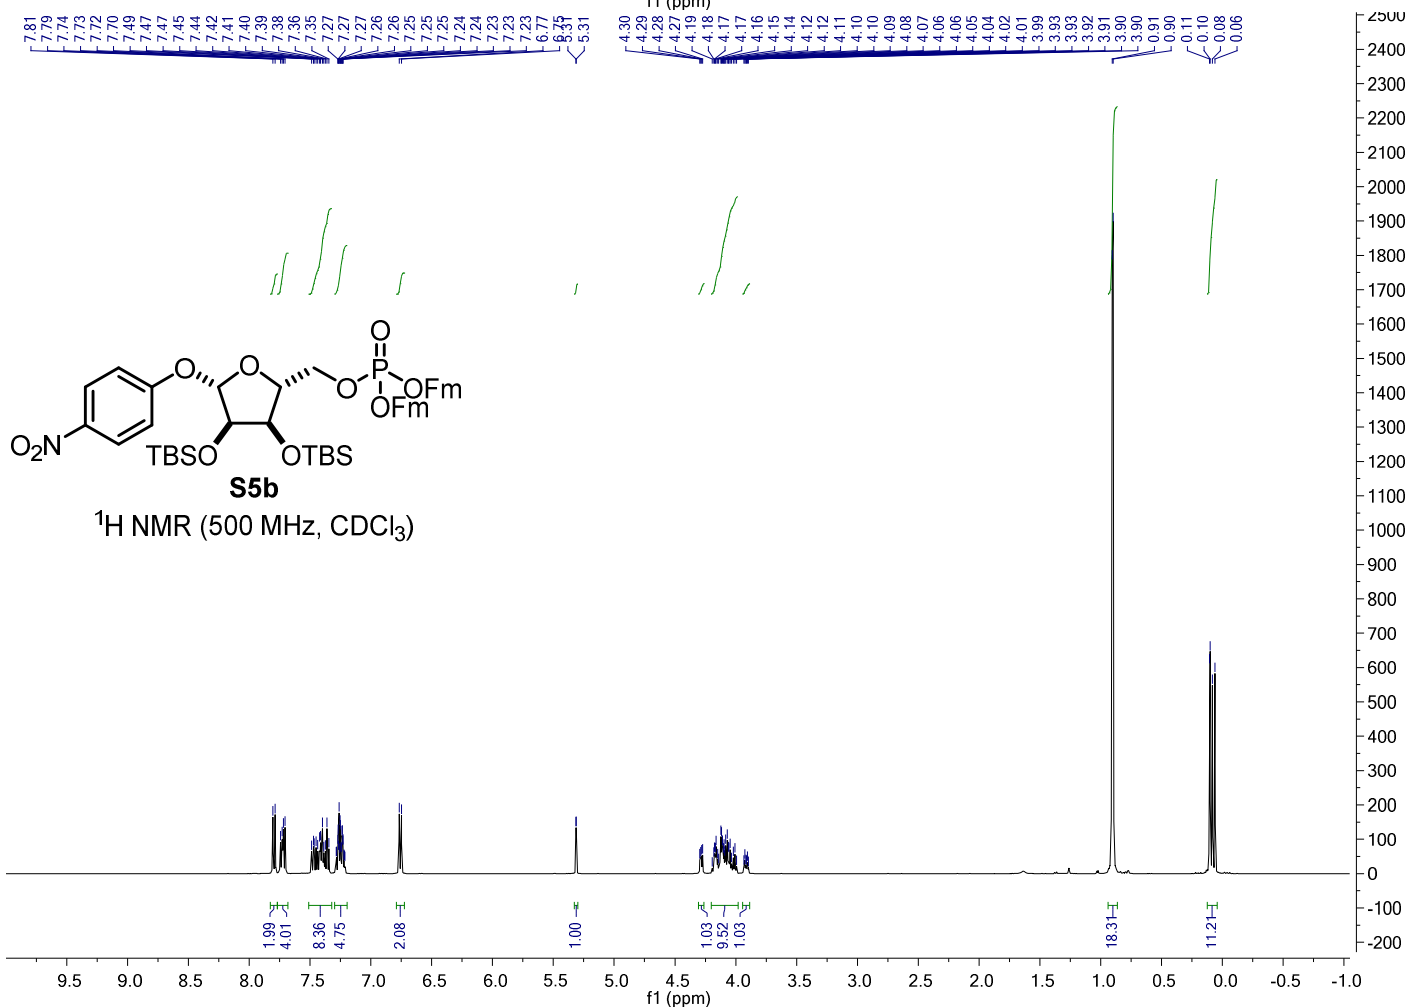

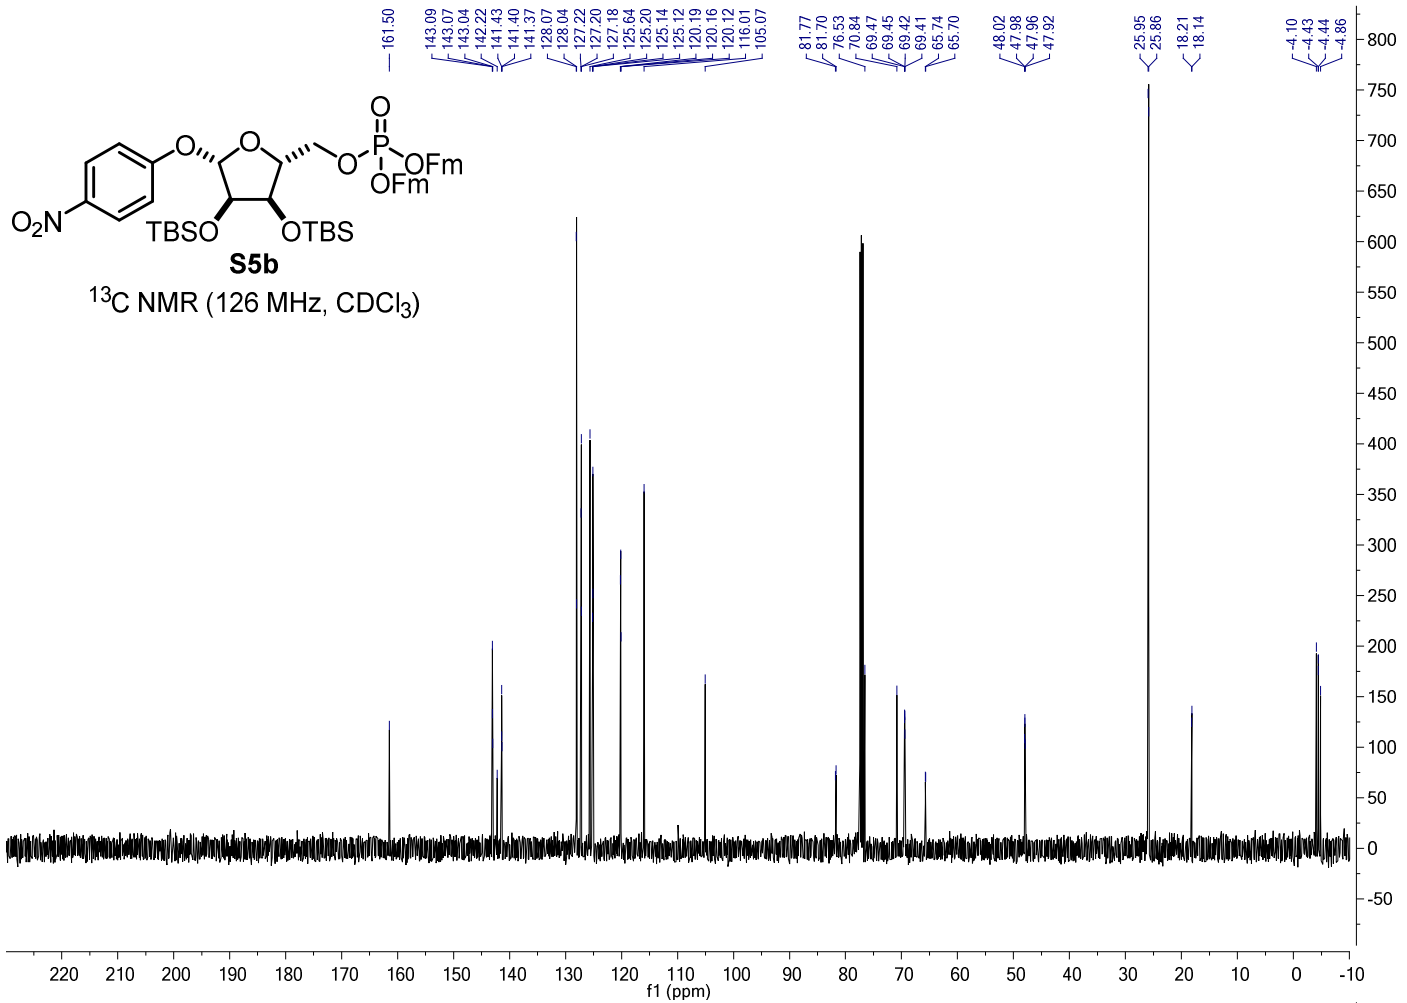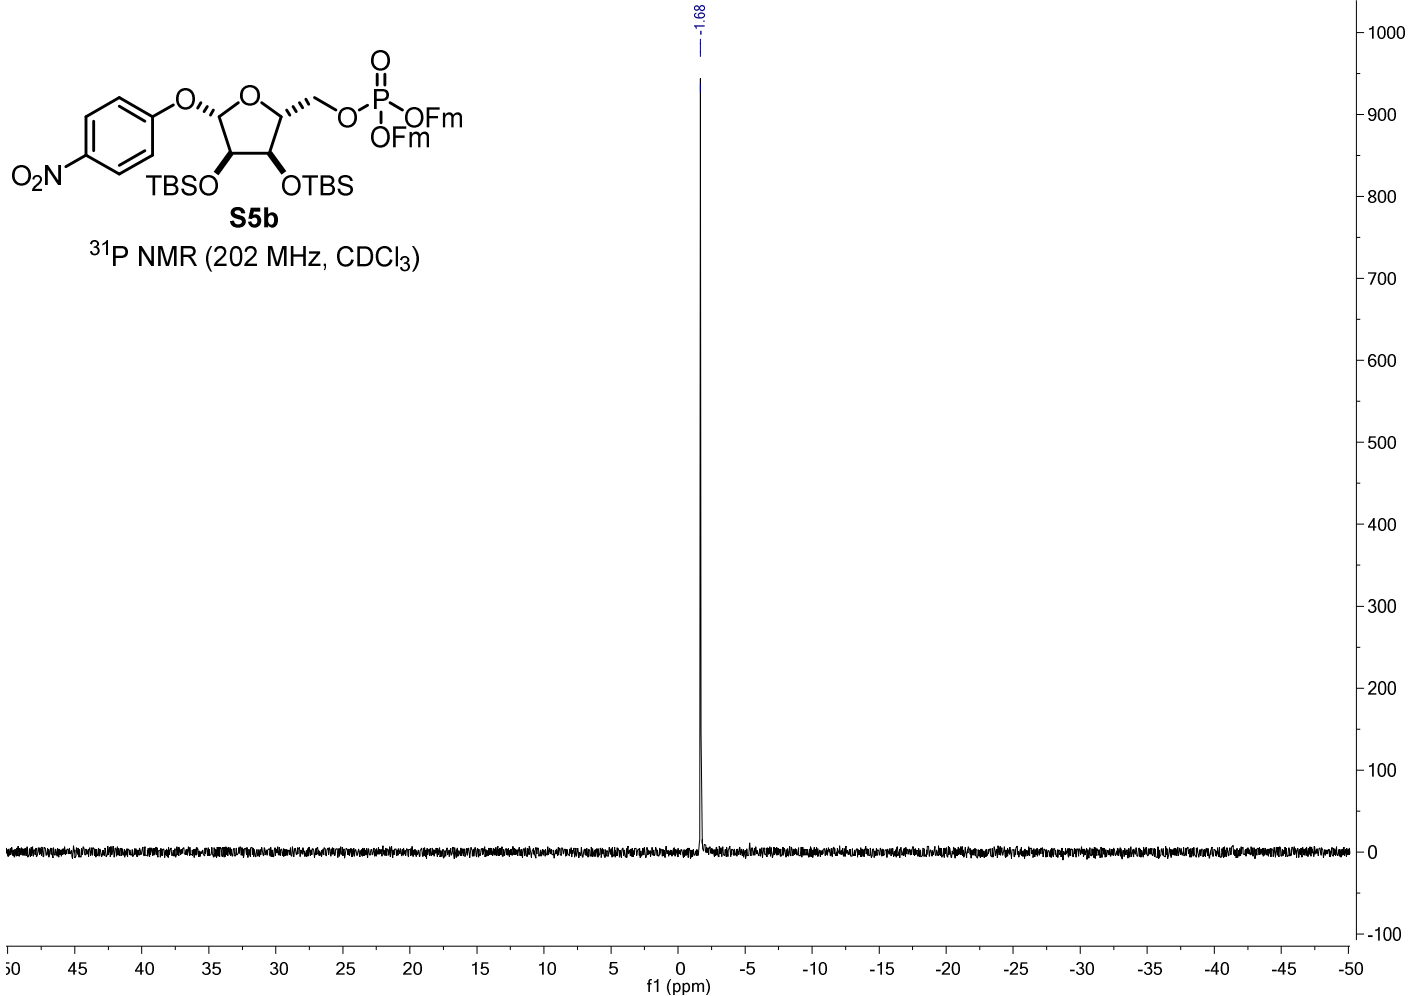

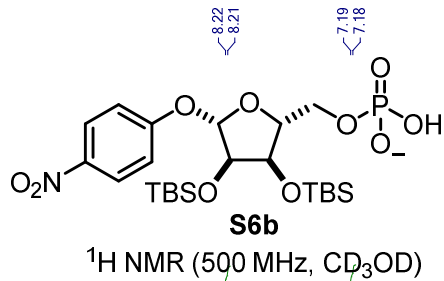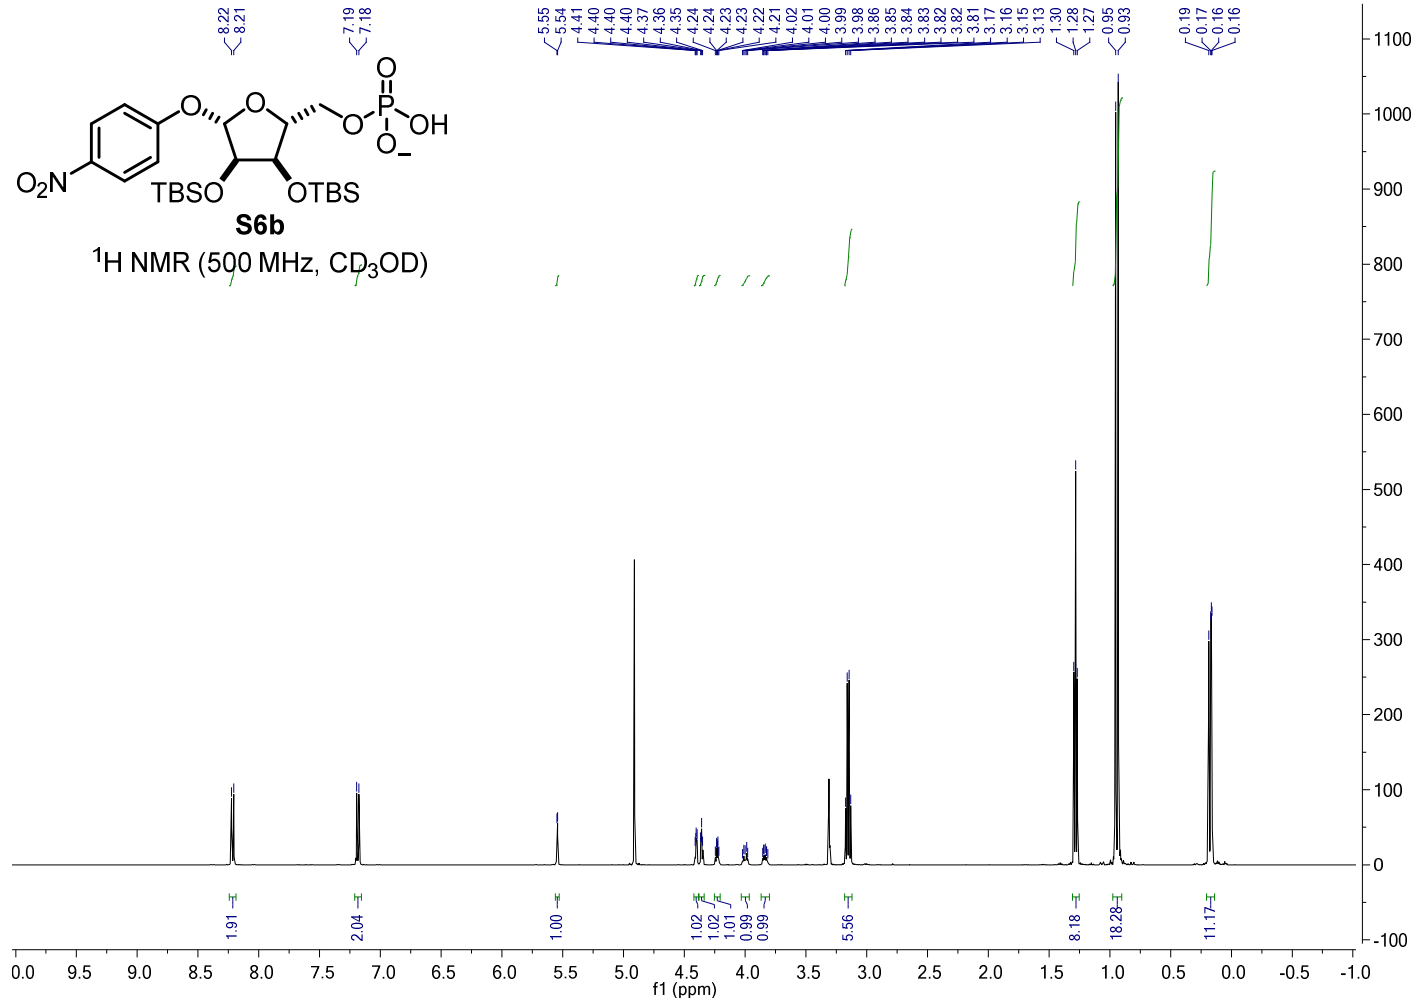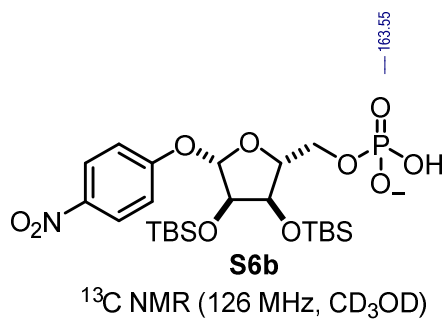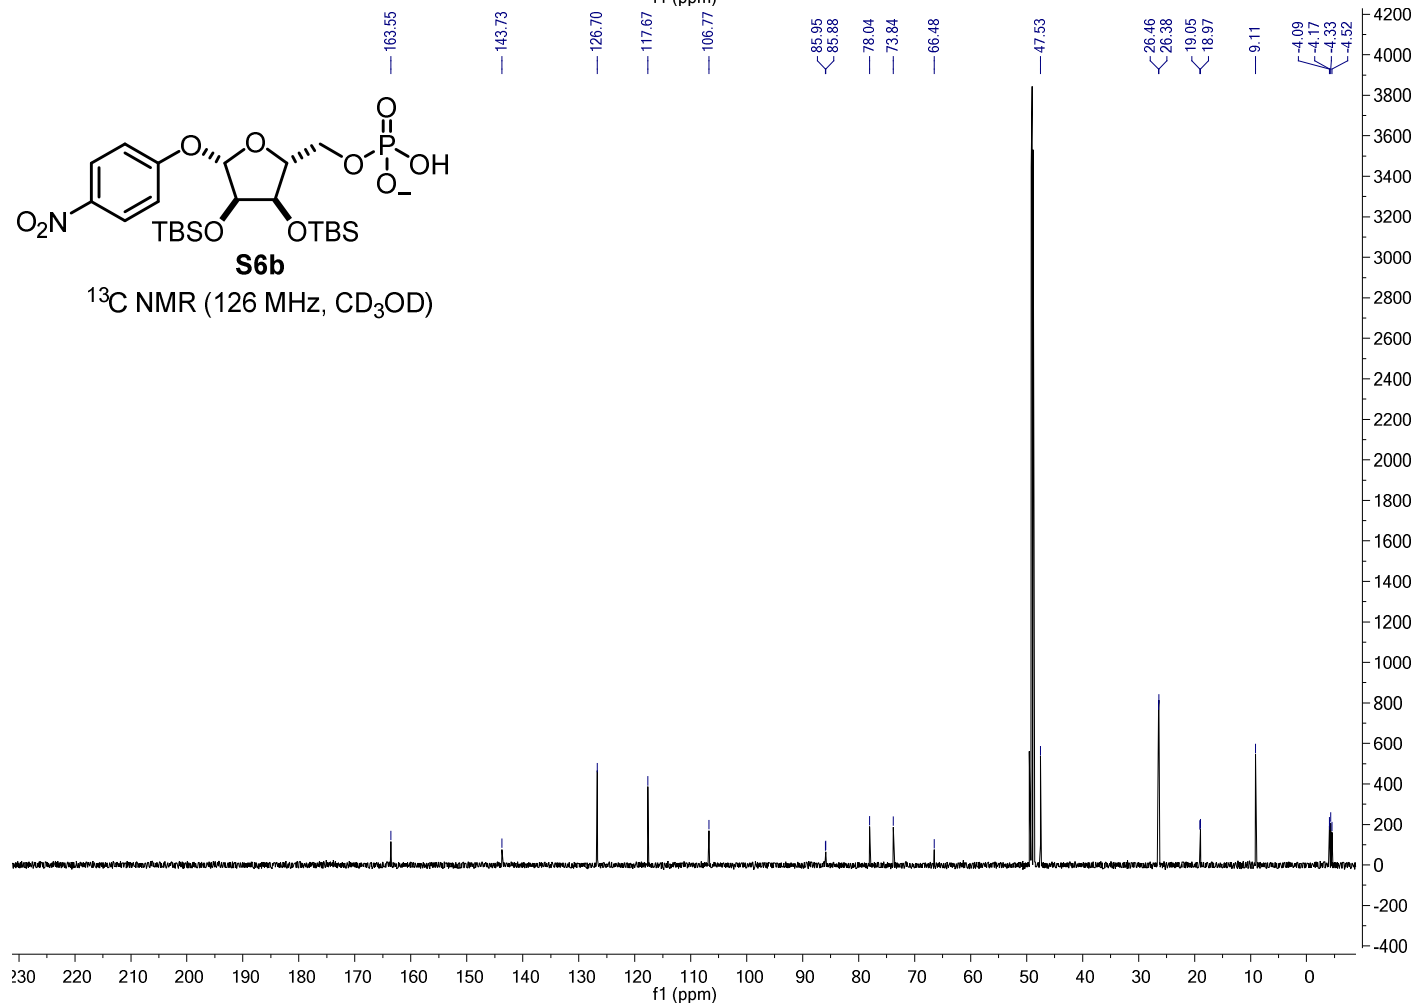



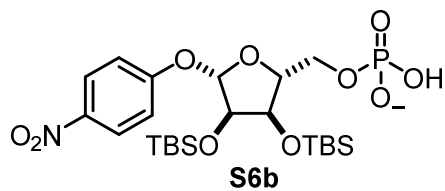

$^{31}\text{P}$  NMR (202 MHz,  $\text{CD}_3\text{OD}$ )

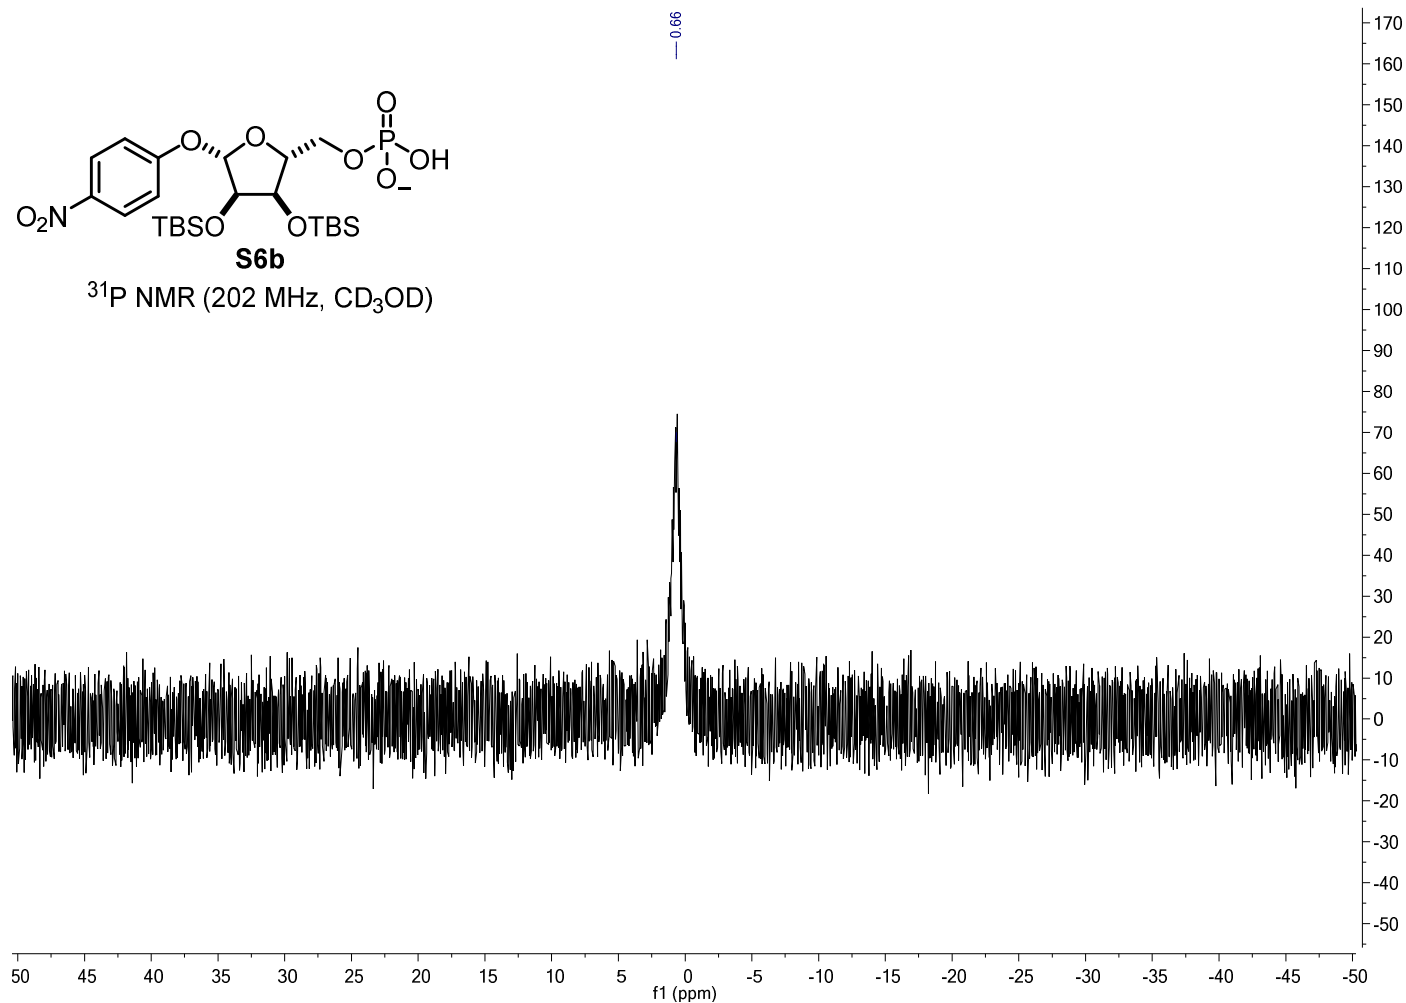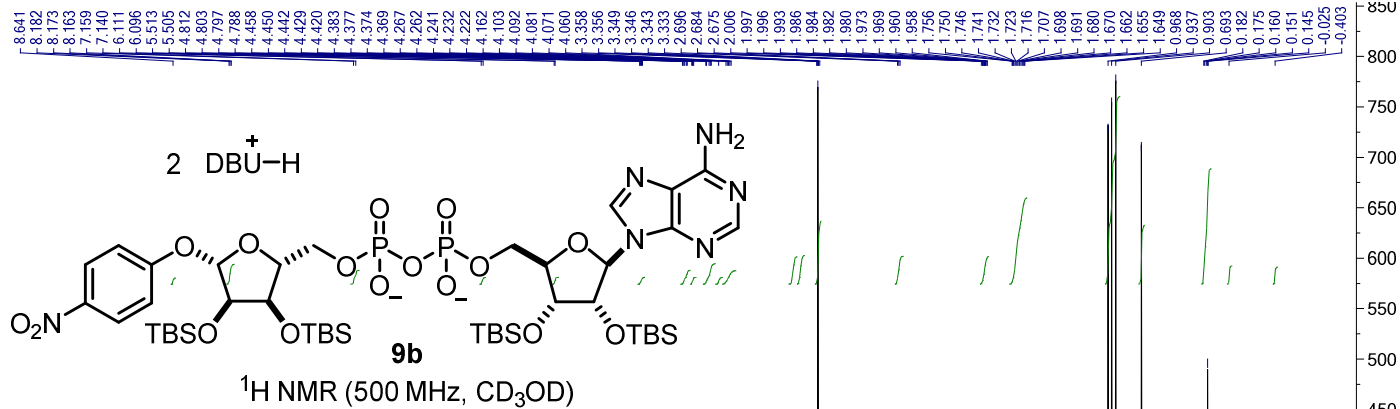

$^1\text{H}$  NMR (500 MHz,  $\text{CD}_3\text{OD}$ )

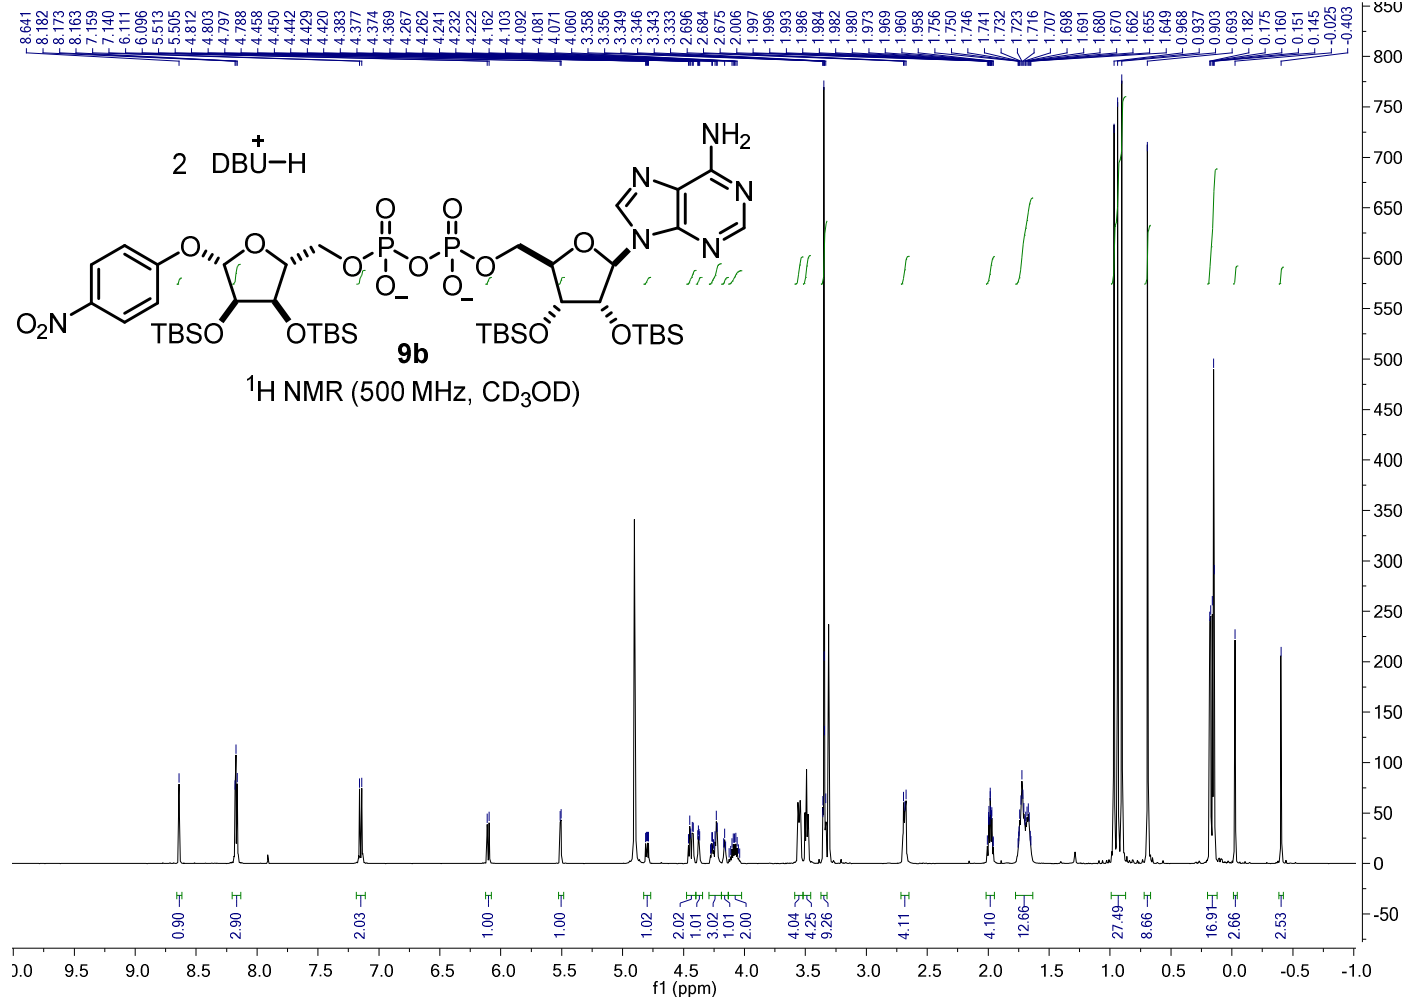

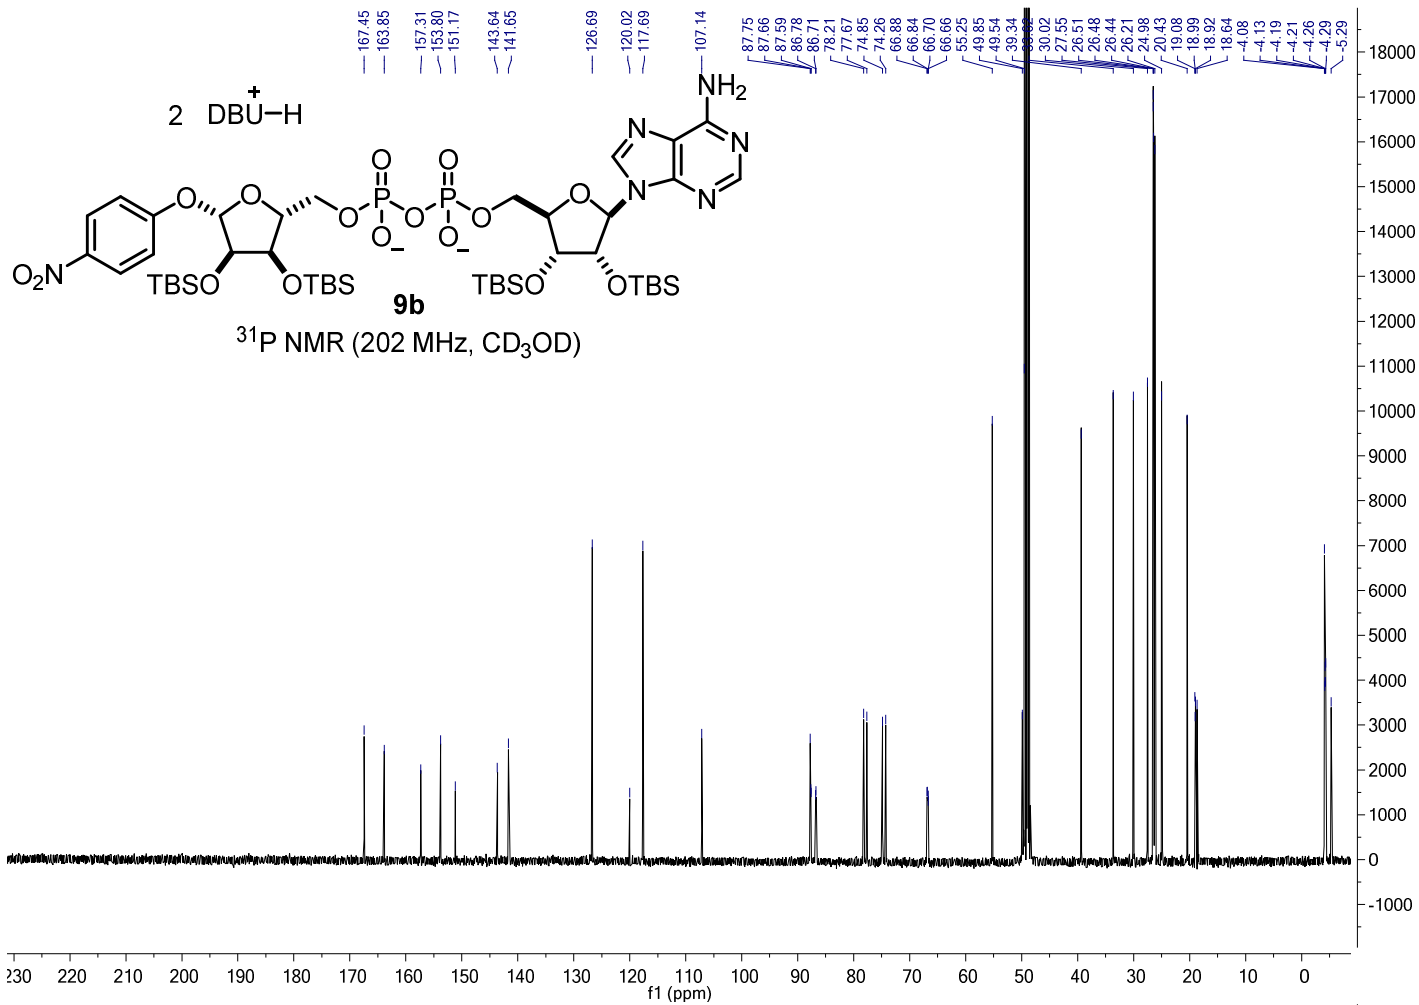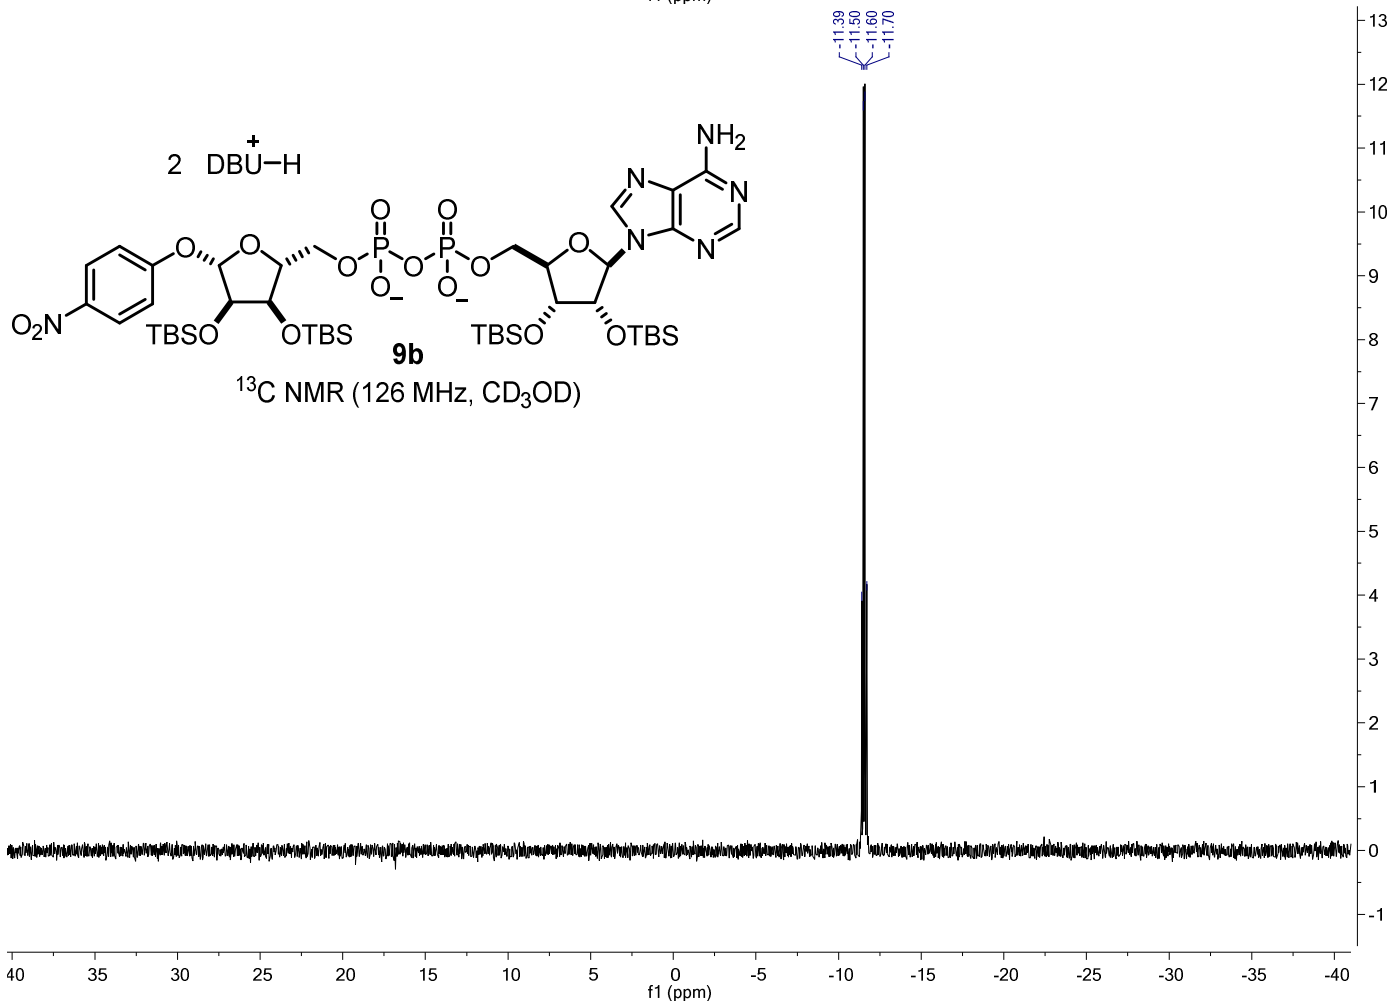

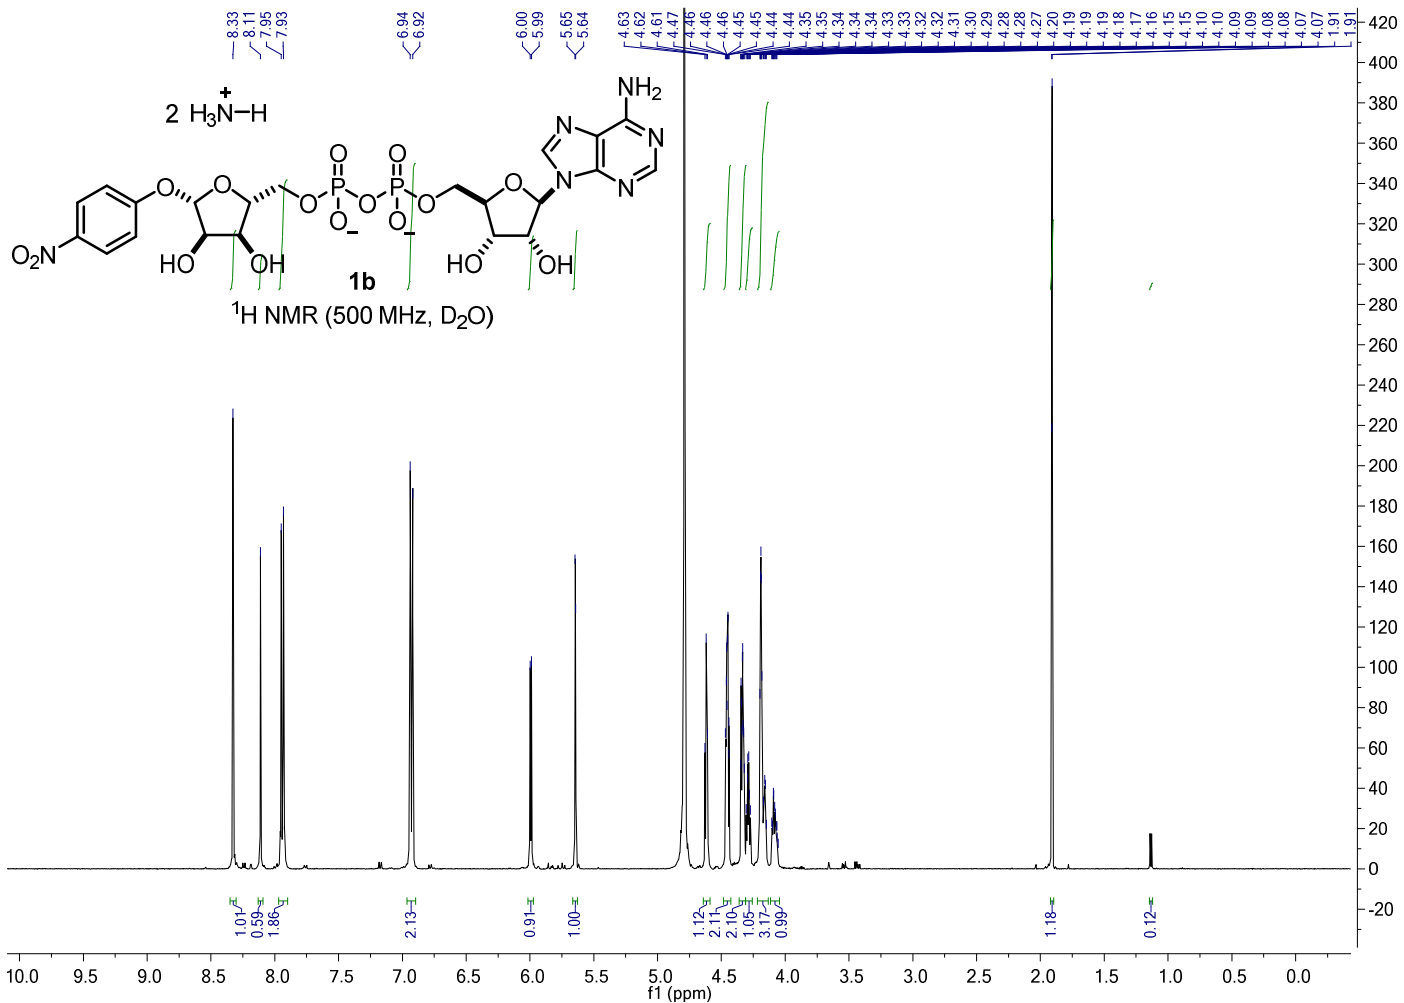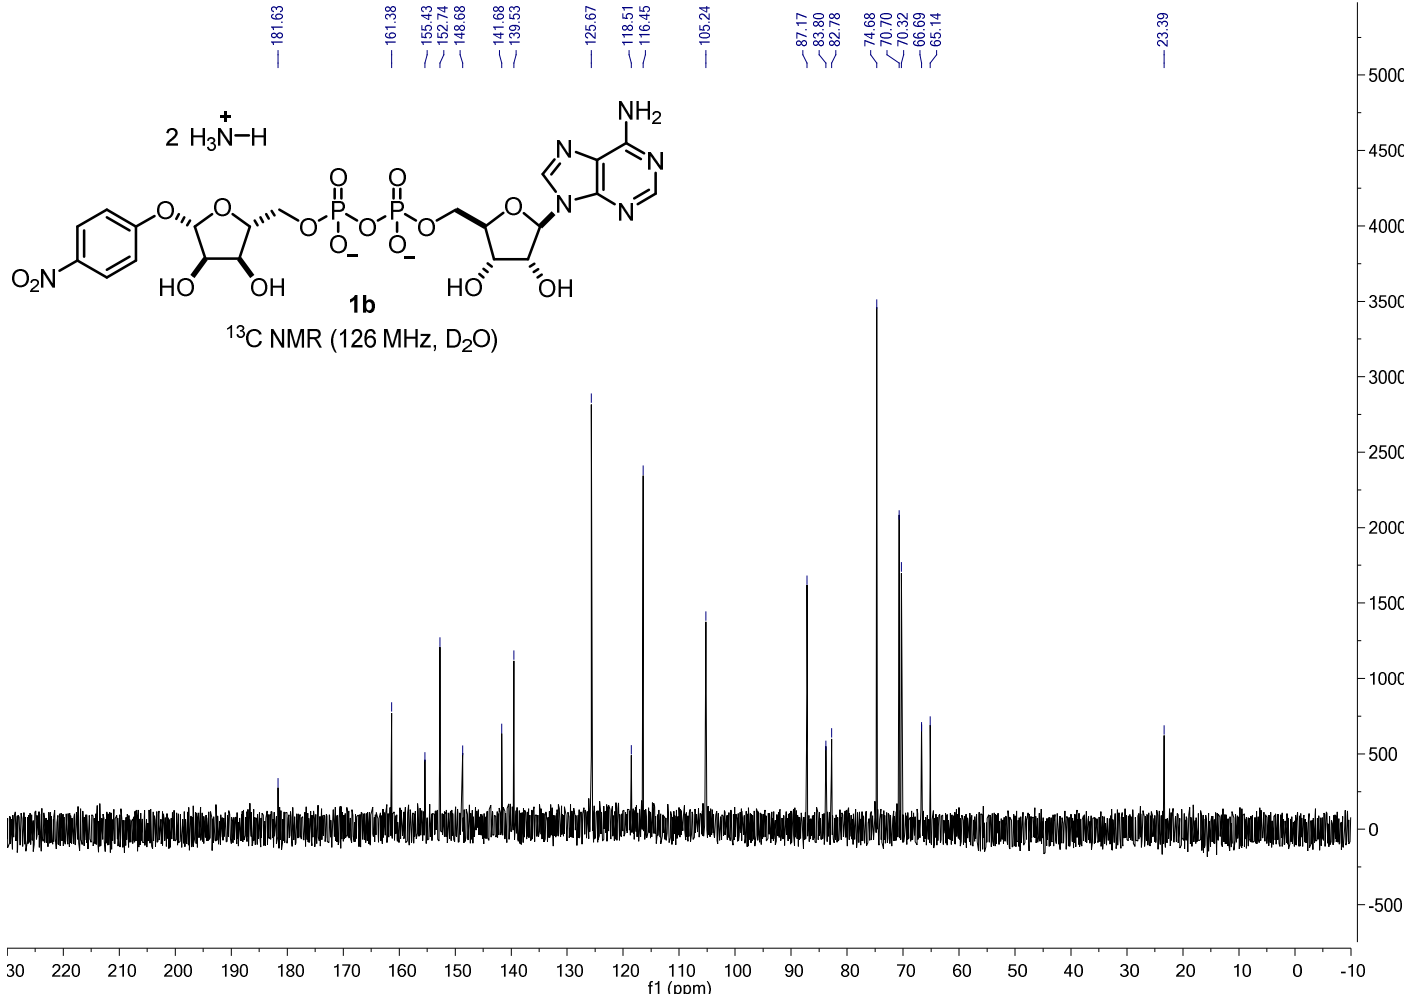

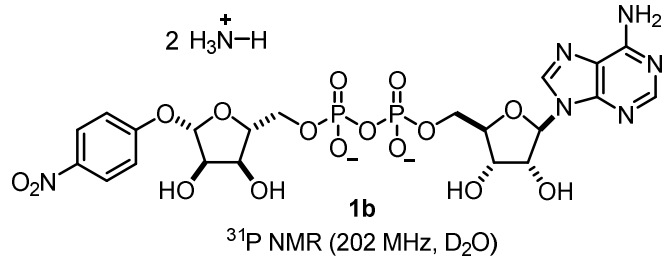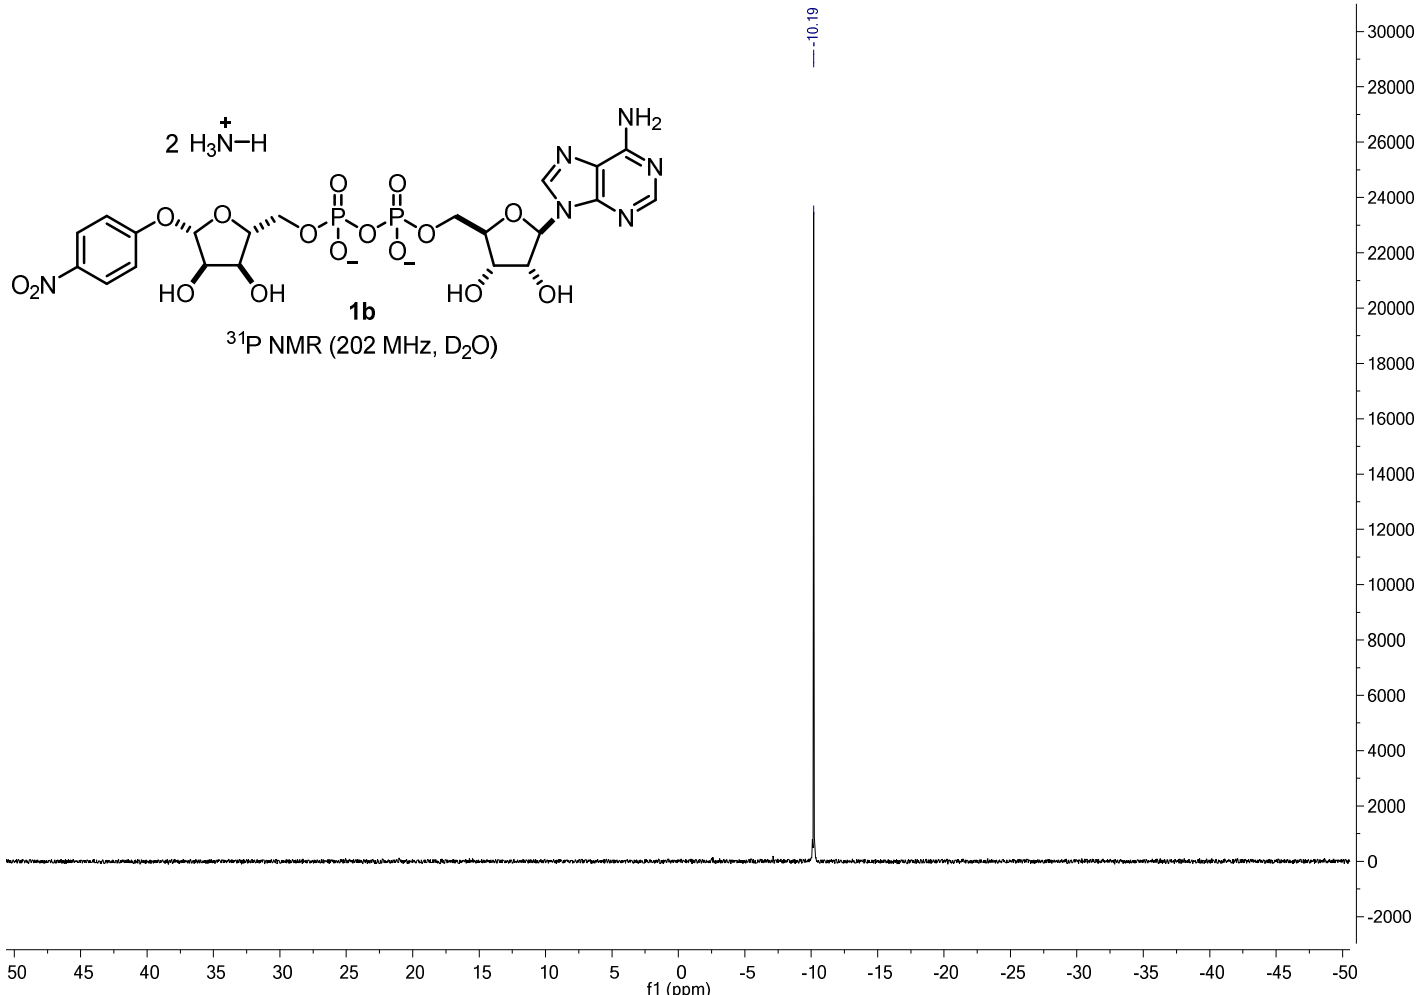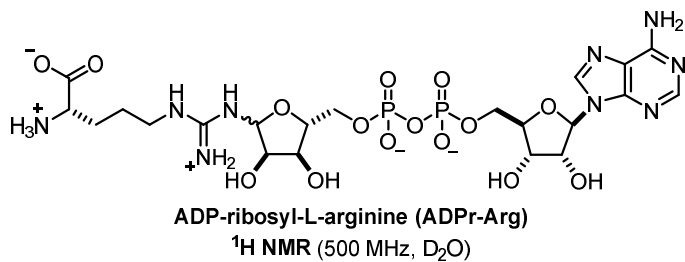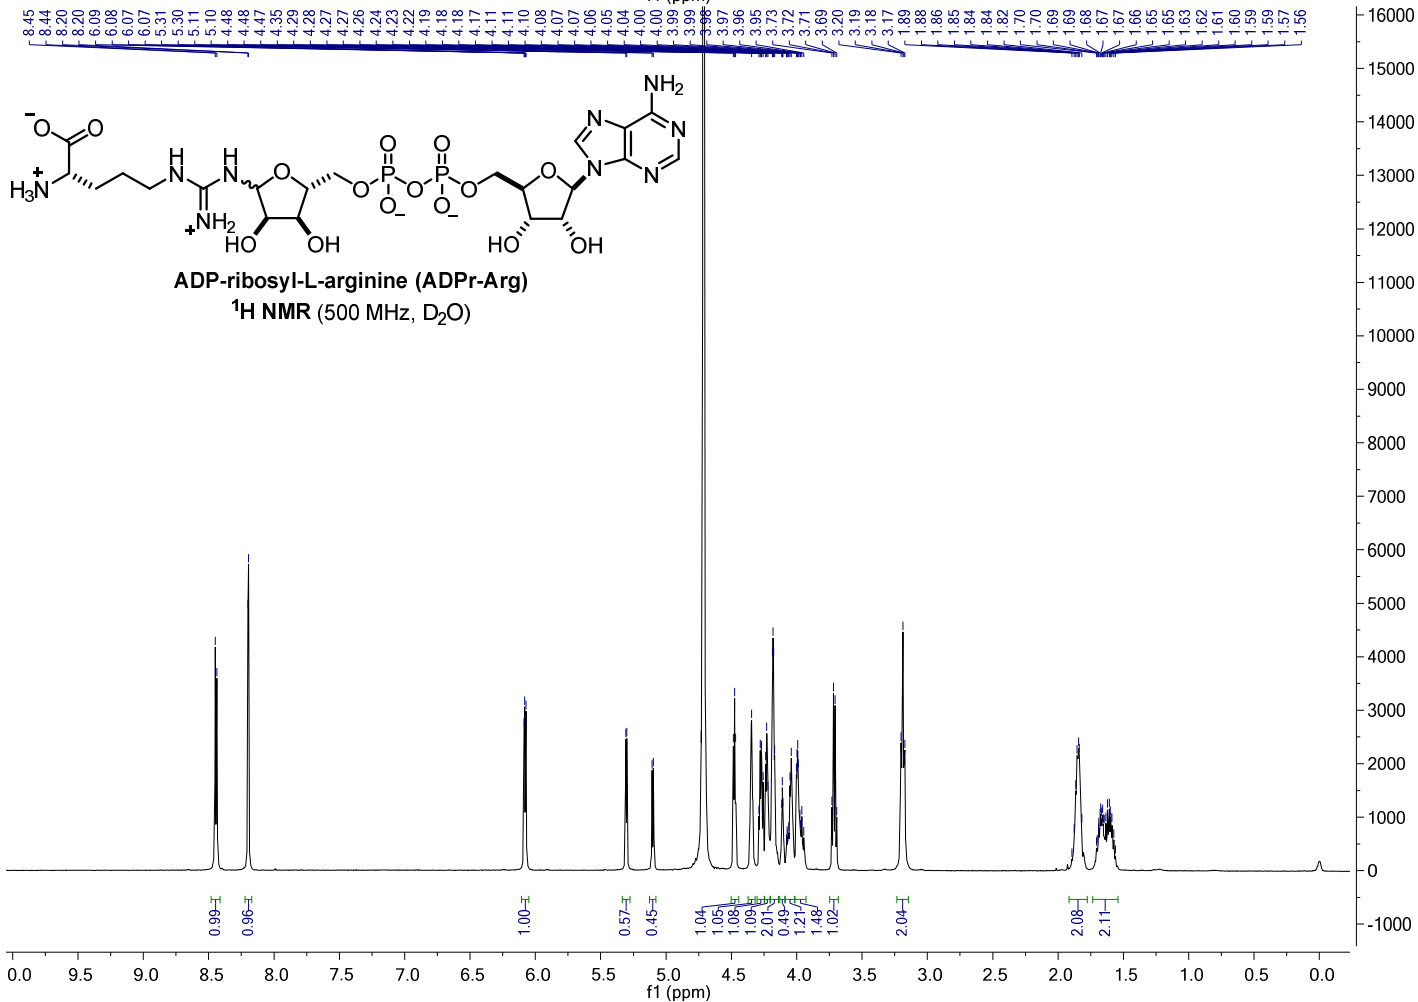

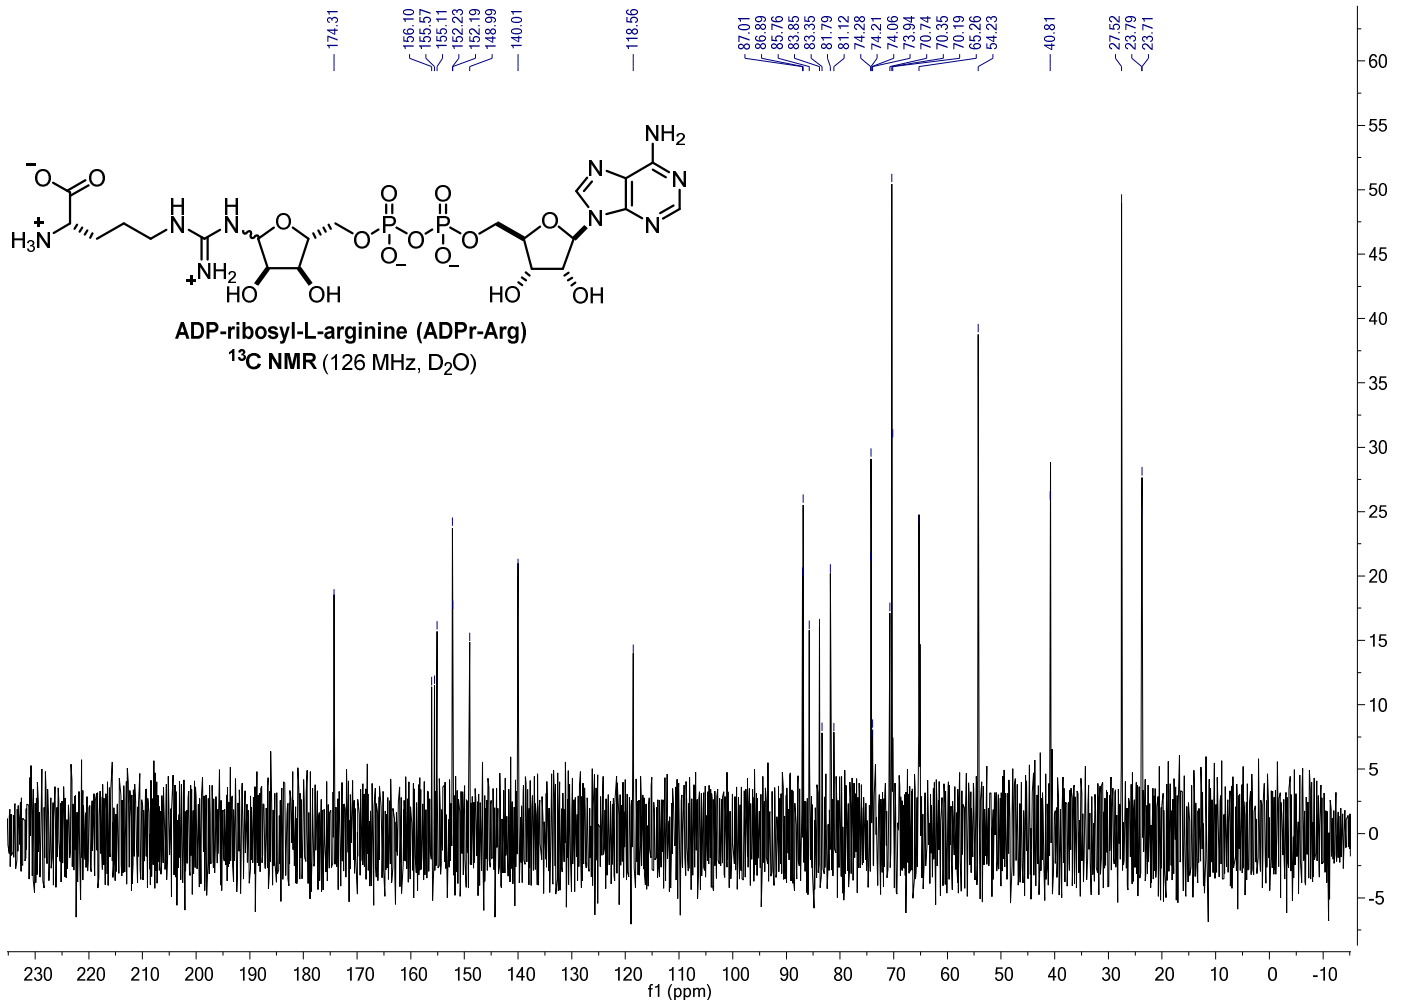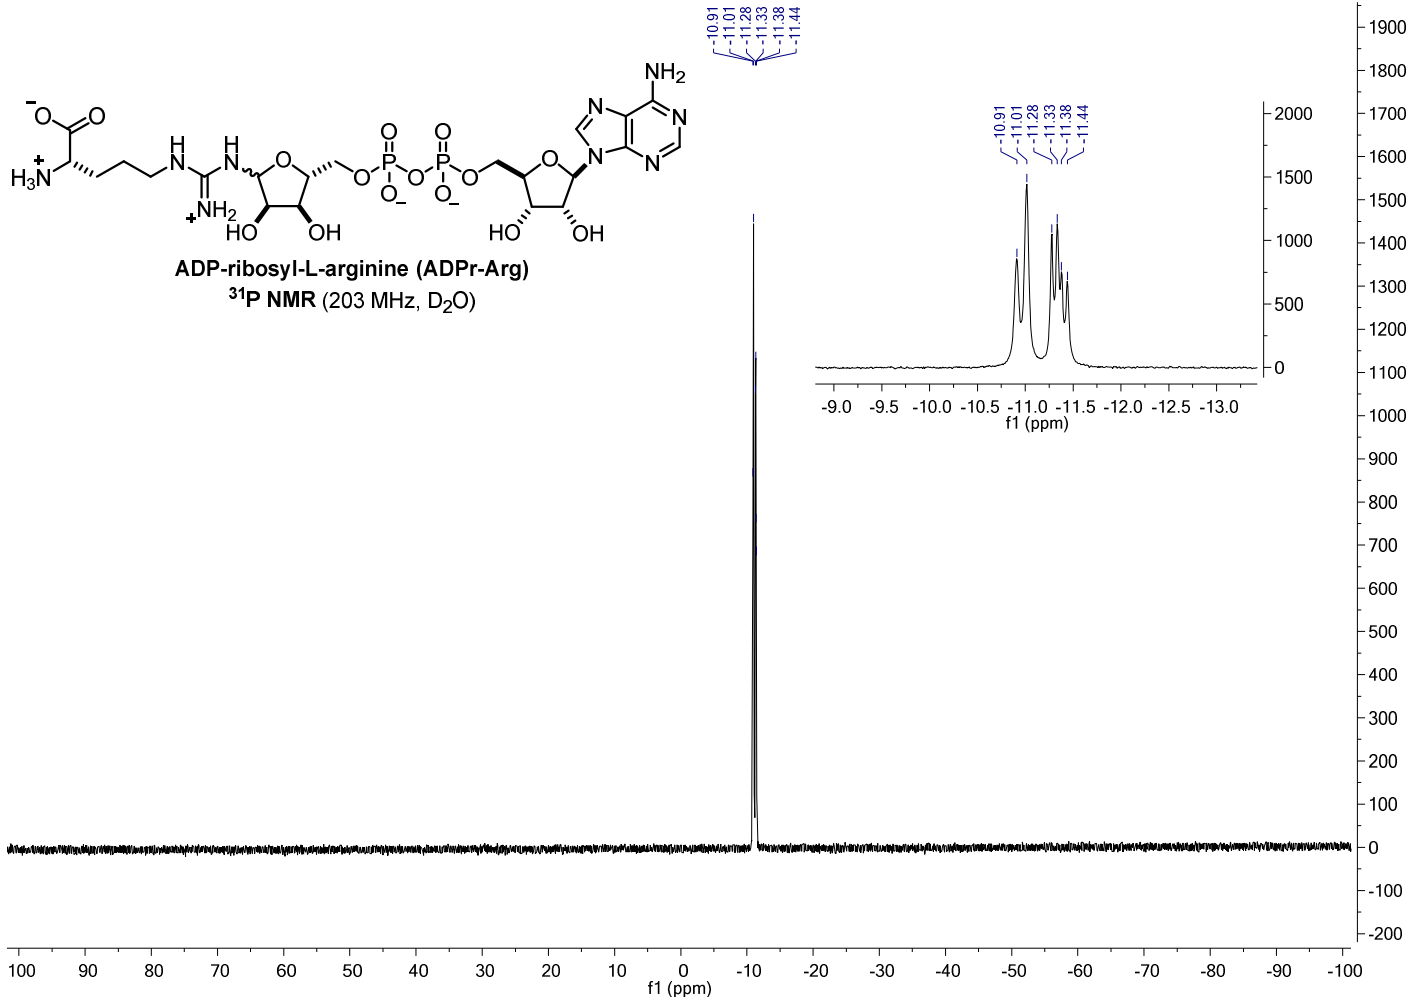

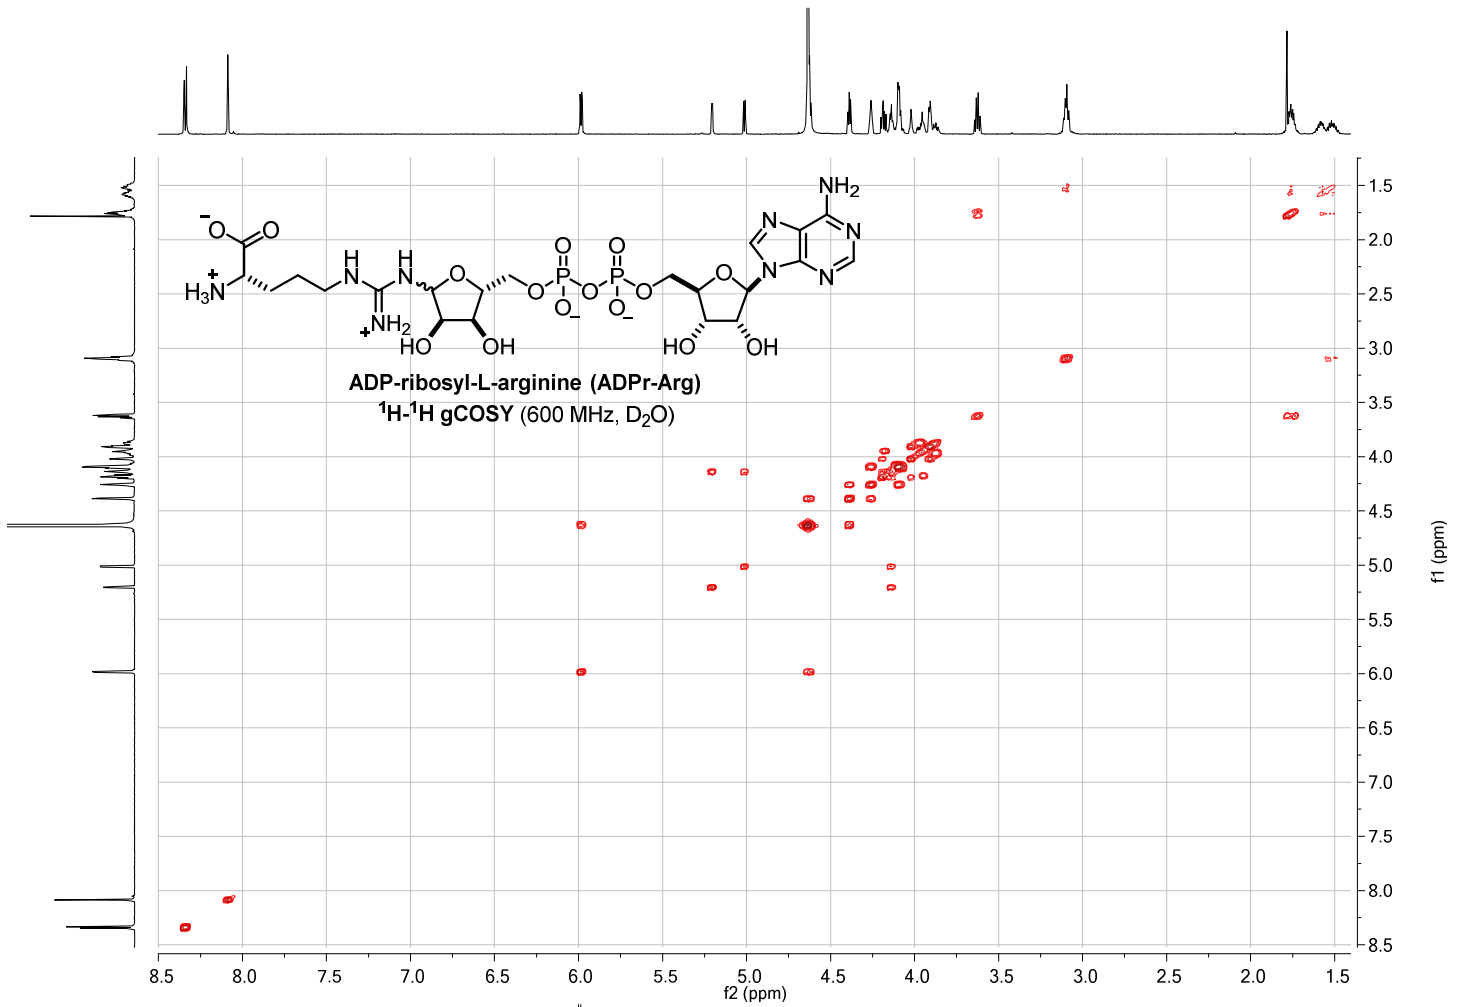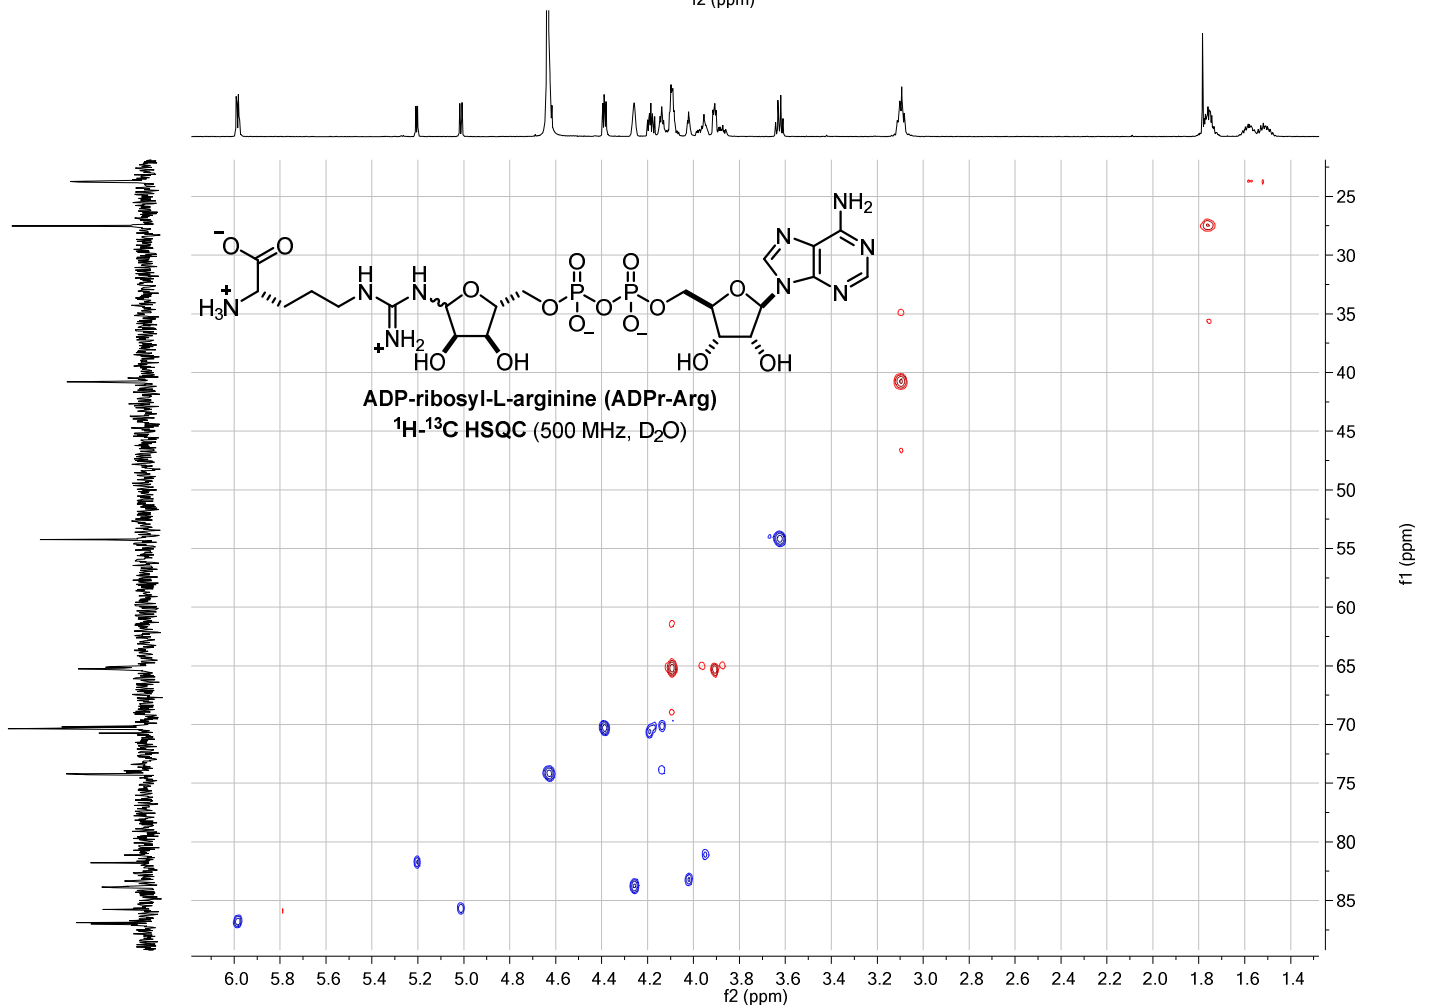

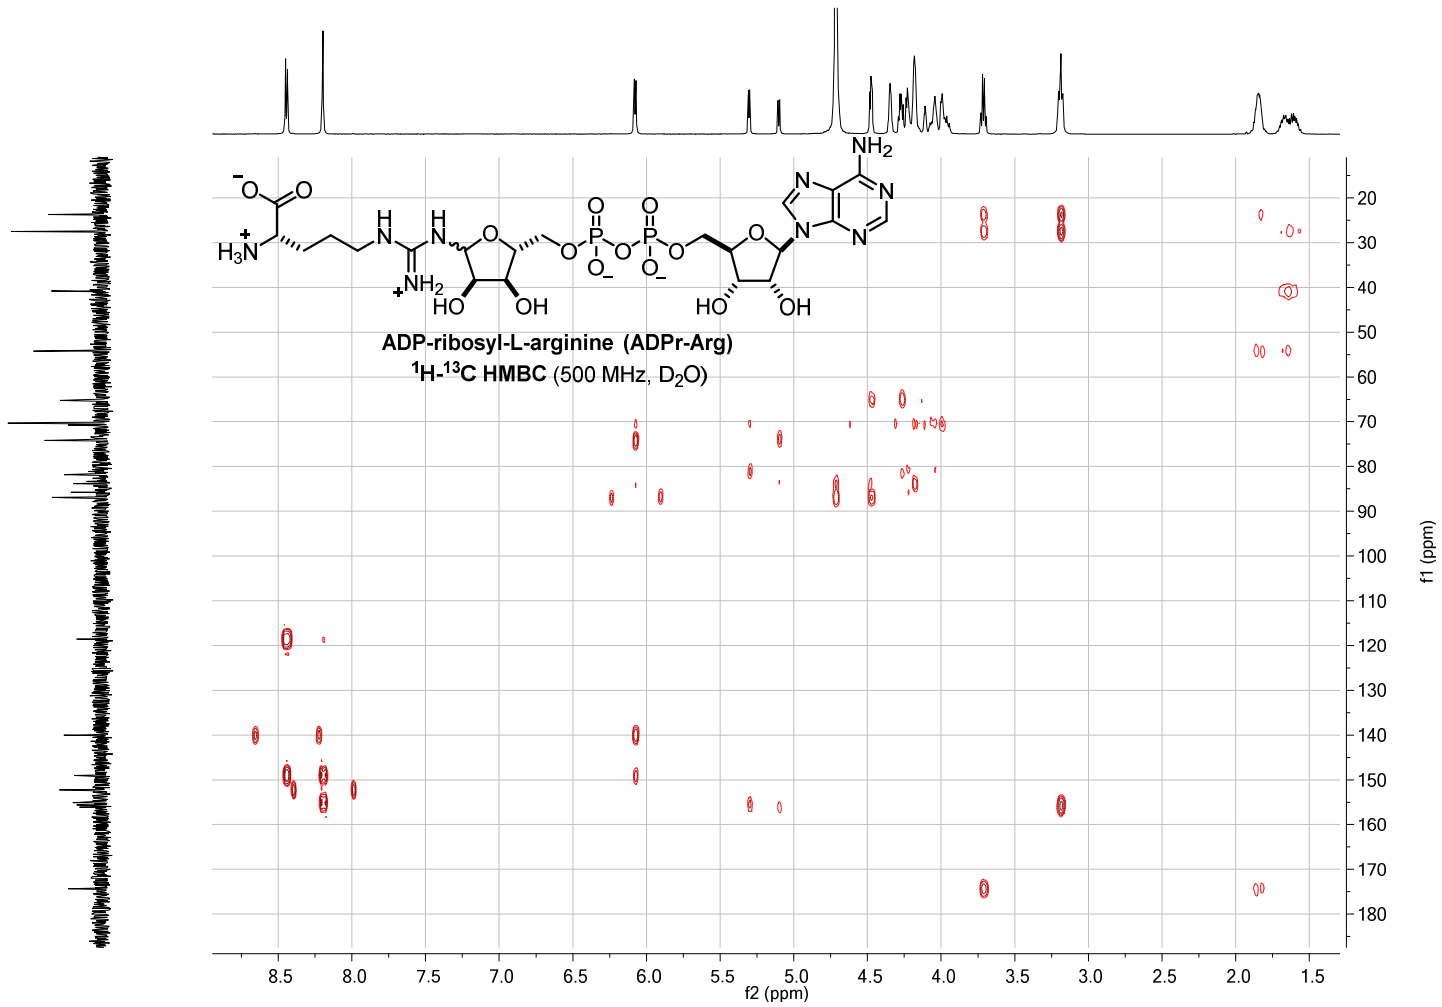

Supplement: NIHMS1507309-supplement-1.pdf [file NIHMS1507309-supplement-1.pdf]
