# Supplementary material
Source: PubMed Central journal article supplement (PMC6309520)
Supplement: NIHMS1507309-supplement-2.pdf [file NIHMS1507309-supplement-2.pdf]

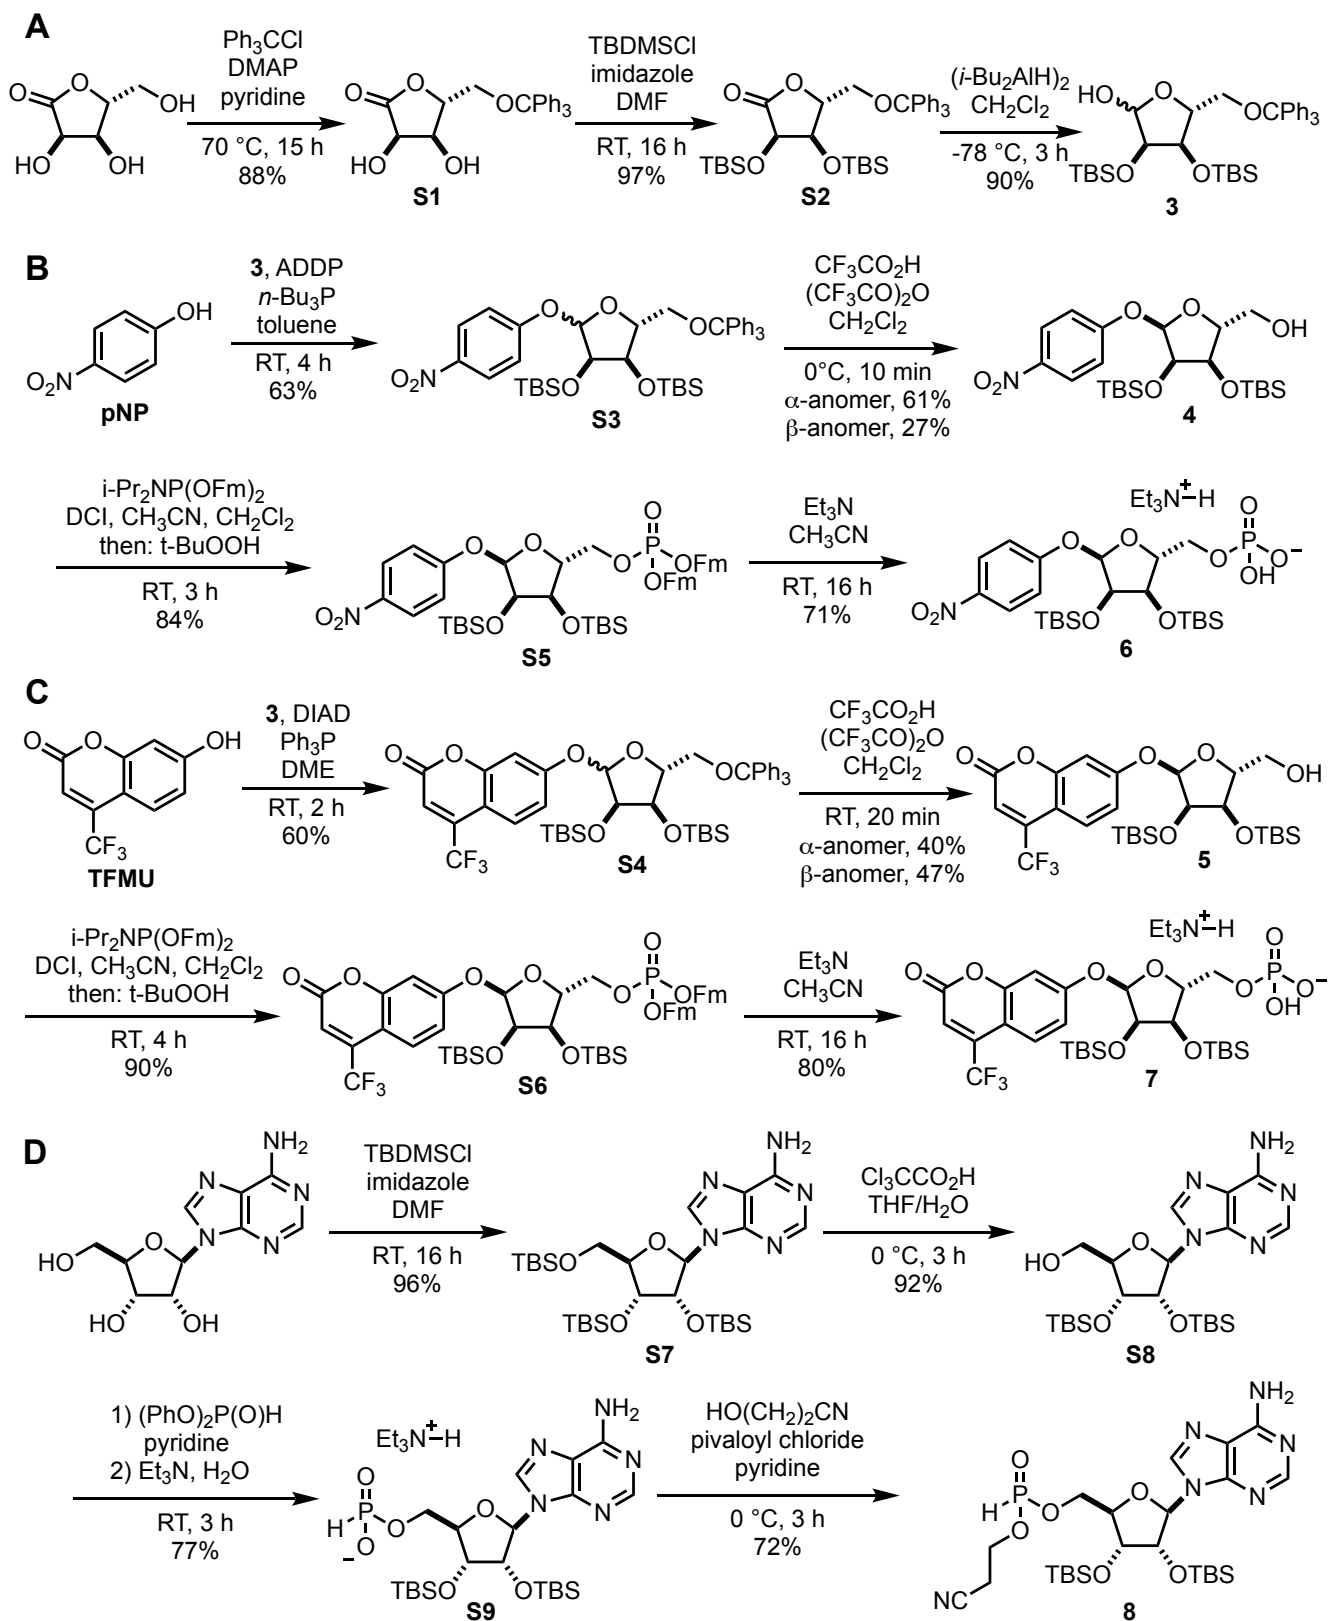

**Figure S1:** Related to Figure 2. Expanded synthetic scheme of glycosyl donor (A), pNP-ribose (B), TFMU-ribose (C), and adenosine phosphonate (D).

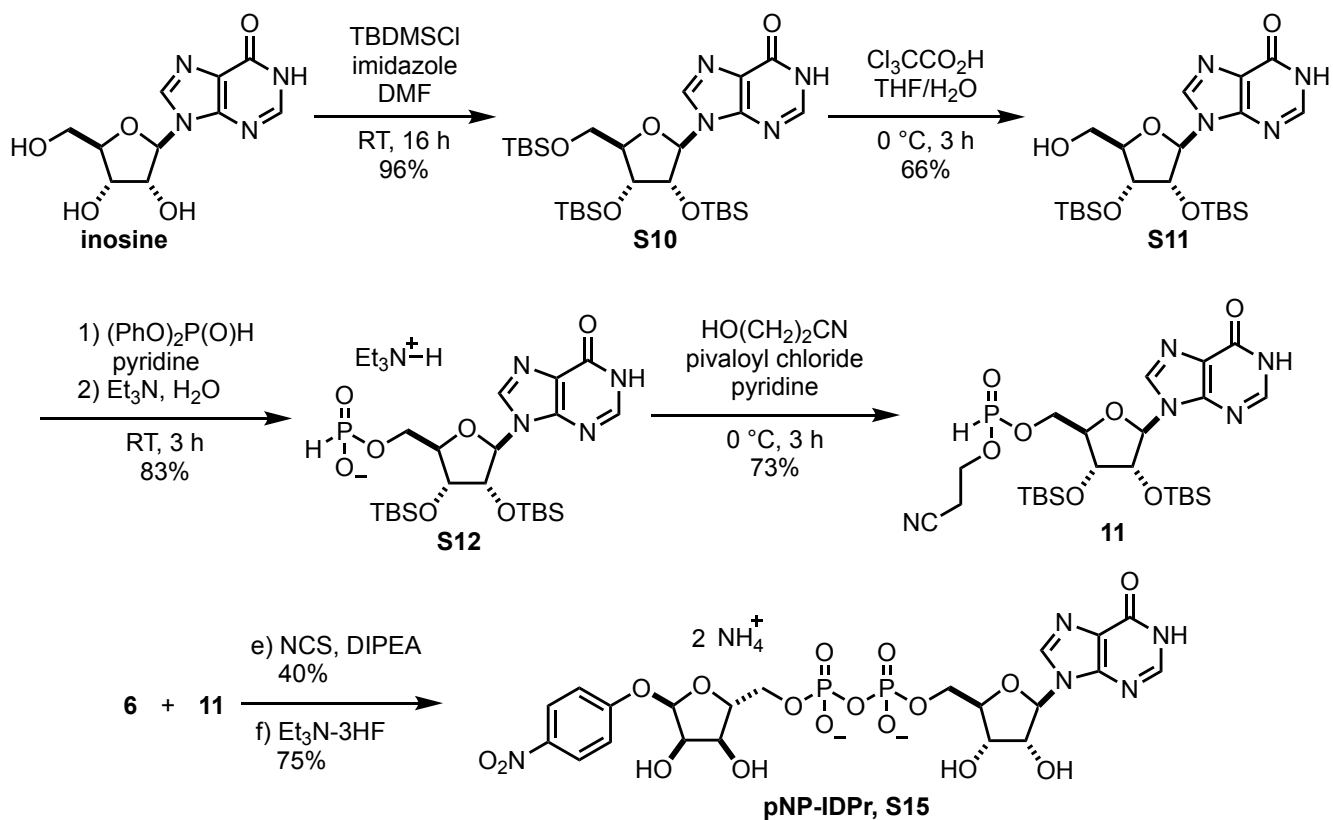

**Figure S2:** Related to Figure 3. Synthesis of pNP-IDPr.

**Table S1:** Related to Figure 3. Docking scores for sugar nucleotides in PARG and ARH3.

| Enzyme                   | Ligand | SP score (kcal/mol) | SP Difference (kcal/mol) | XP score (kcal/mol) | XP difference (kcal/mol) |
|--------------------------|--------|---------------------|--------------------------|---------------------|--------------------------|
| <i>L. chalumnae</i> ARH3 | ADPr   | -7.539              | -                        | -6.254              | -                        |
|                          | IDPr   | -6.729              | 0.810                    | -7.000              | -0.746                   |
|                          | GDPPr  | -6.692              | 0.847                    | -6.131              | 0.123                    |
|                          | XDPPr  | -7.100              | 0.439                    | -6.732              | -0.478                   |
| <i>H. sapiens</i> PARG   | ADPr   | -12.229             | -                        | -8.262              | -                        |
|                          | IDPr   | -10.332             | 1.897                    | -6.613              | 1.649                    |
|                          | GDPPr  | -10.906             | 1.323                    | -6.323              | 1.939                    |
|                          | XDPPr  | -11.292             | 0.937                    | -6.090              | 2.172                    |

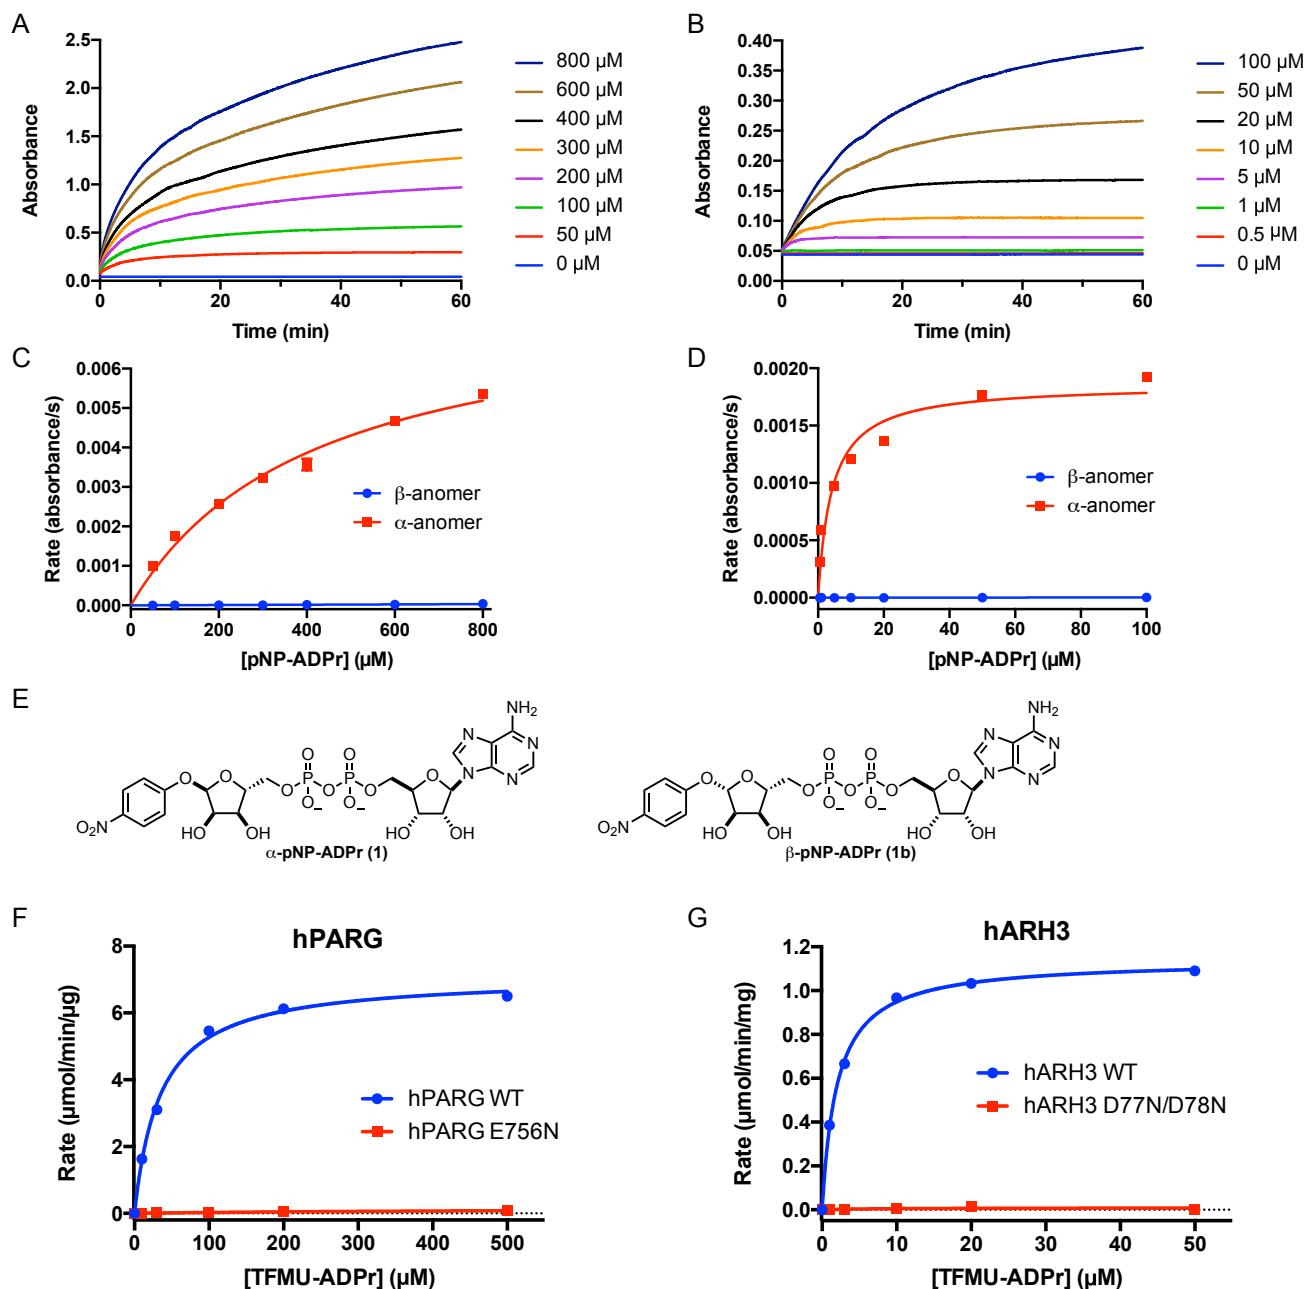

**Figure S3:** Related to Figure 4. A. Reaction progress curves of ttPARG-catalyzed hydrolysis of pNP-ADPr. Enzyme (50 nM) was incubated with varying concentration of pNP-ADPr in 50  $\mu\text{L}$  of appropriate reaction buffer in a 384-well plate. Reaction was monitored every 2 s for 60 min. B. Same as B but with hARH3. C. Stereoselectivity of PARG and ARH3 for  $\alpha$  glycosidic bonds. ttPARG (50 nM) was incubated with varying concentrations of  $\alpha$  and  $\beta$  pNP-ADPr in 50  $\mu\text{L}$  of appropriate reaction buffer in a 384-well plate. Initial reaction rates were obtained by monitoring reaction progress using an absorbance plate reader (405 nm). D. Same as C but with hARH3. E. Structures of  $\alpha$  and  $\beta$  pNP-ADPr. F. Processing of TFMU-ADPr by catalytically active (WT) and inactive (E756N) hPARG. G. Processing of TFMU-ADPr by catalytically active (WT) and inactive (D77N/D78N) hARH3. Error bars represent SEM,  $n = 3$ .

### Replicate 1

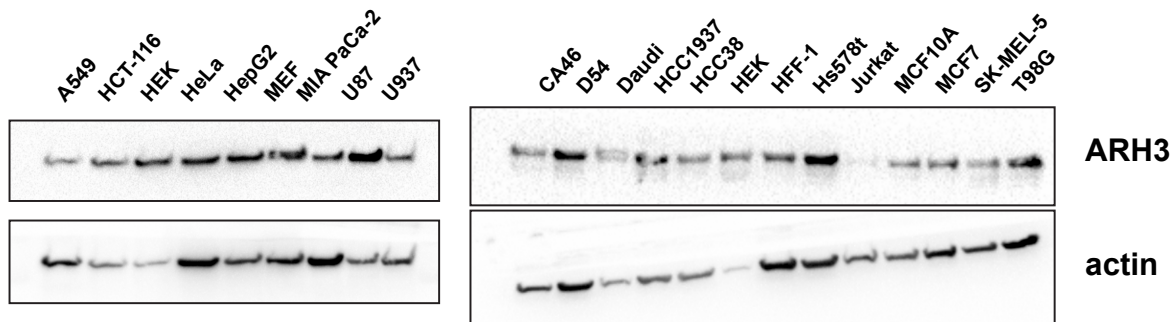

### Replicate 2

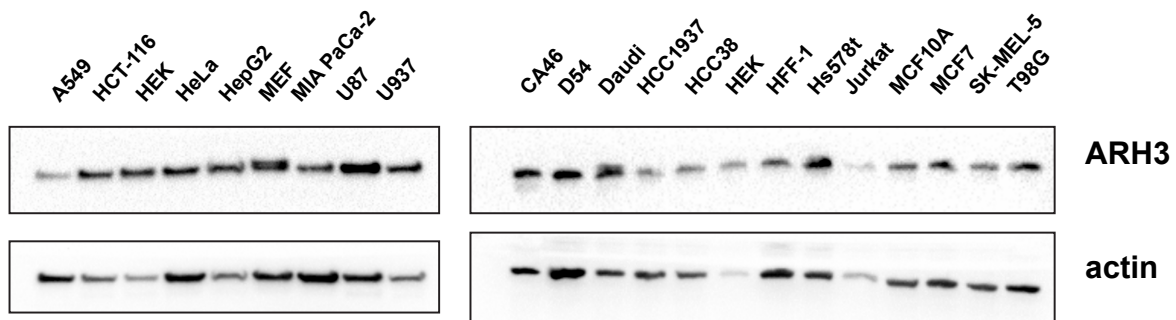

**Figure S4:** Related to Figure 5. Expanded images of Western blotting to evaluate ARH3 expression. Replicate 1 is same as shown in Figure 5D but without straightening. Anti-ARH3 (1:1000), anti-PARP1 (1:3000), anti-actin (1:3000).

**Table S2:** Related to Figure 5. Data used to construct Figure 5D.

| Cell Line  | ARH3 Activity<br>(milli-units/min/ $\mu$ g) | Relative ARH3 expression<br>(ARH3/actin) |
|------------|---------------------------------------------|------------------------------------------|
| U87        | 290 $\pm$ 52                                | 2.3 $\pm$ 0.4                            |
| HepG2      | 215 $\pm$ 19                                | 3.0 $\pm$ 0.9                            |
| HEK        | 192 $\pm$ 20                                | 3.3 $\pm$ 0.4                            |
| HCT-116    | 173 $\pm$ 17                                | 1.54 $\pm$ 0.06                          |
| Hs578t     | 170 $\pm$ 34                                | 1.5 $\pm$ 0.6                            |
| HeLa       | 159 $\pm$ 18                                | 1.0 $\pm$ 0.2                            |
| MIA PaCa-2 | 157 $\pm$ 25                                | 0.49 $\pm$ 0.08                          |
| MEF        | 153 $\pm$ 38                                | 1.24 $\pm$ 0.09                          |
| D54        | 147 $\pm$ 34                                | 0.90 $\pm$ 0.05                          |
| T98G       | 139 $\pm$ 7                                 | 0.9 $\pm$ 0.2                            |
| U937       | 137 $\pm$ 34                                | 1.0 $\pm$ 0.3                            |
| HFF-1      | 105 $\pm$ 20                                | 0.5 $\pm$ 0.1                            |
| HCC38      | 100 $\pm$ 19                                | 0.88 $\pm$ 0.09                          |
| MCF7       | 92 $\pm$ 40                                 | 0.8 $\pm$ 0.3                            |
| SK-MEL-5   | 87 $\pm$ 13                                 | 0.7 $\pm$ 0.2                            |
| HCC1937    | 76 $\pm$ 4                                  | 0.9 $\pm$ 0.2                            |
| A549       | 67 $\pm$ 23                                 | 0.38 $\pm$ 0.02                          |
| Jurkat     | 36 $\pm$ 7                                  | 0.3 $\pm$ 0.2                            |
| Daudi      | 27 $\pm$ 35                                 | 1.6 $\pm$ 0.7                            |
| MCF10A     | -5 $\pm$ 12                                 | 0.8 $\pm$ 0.3                            |

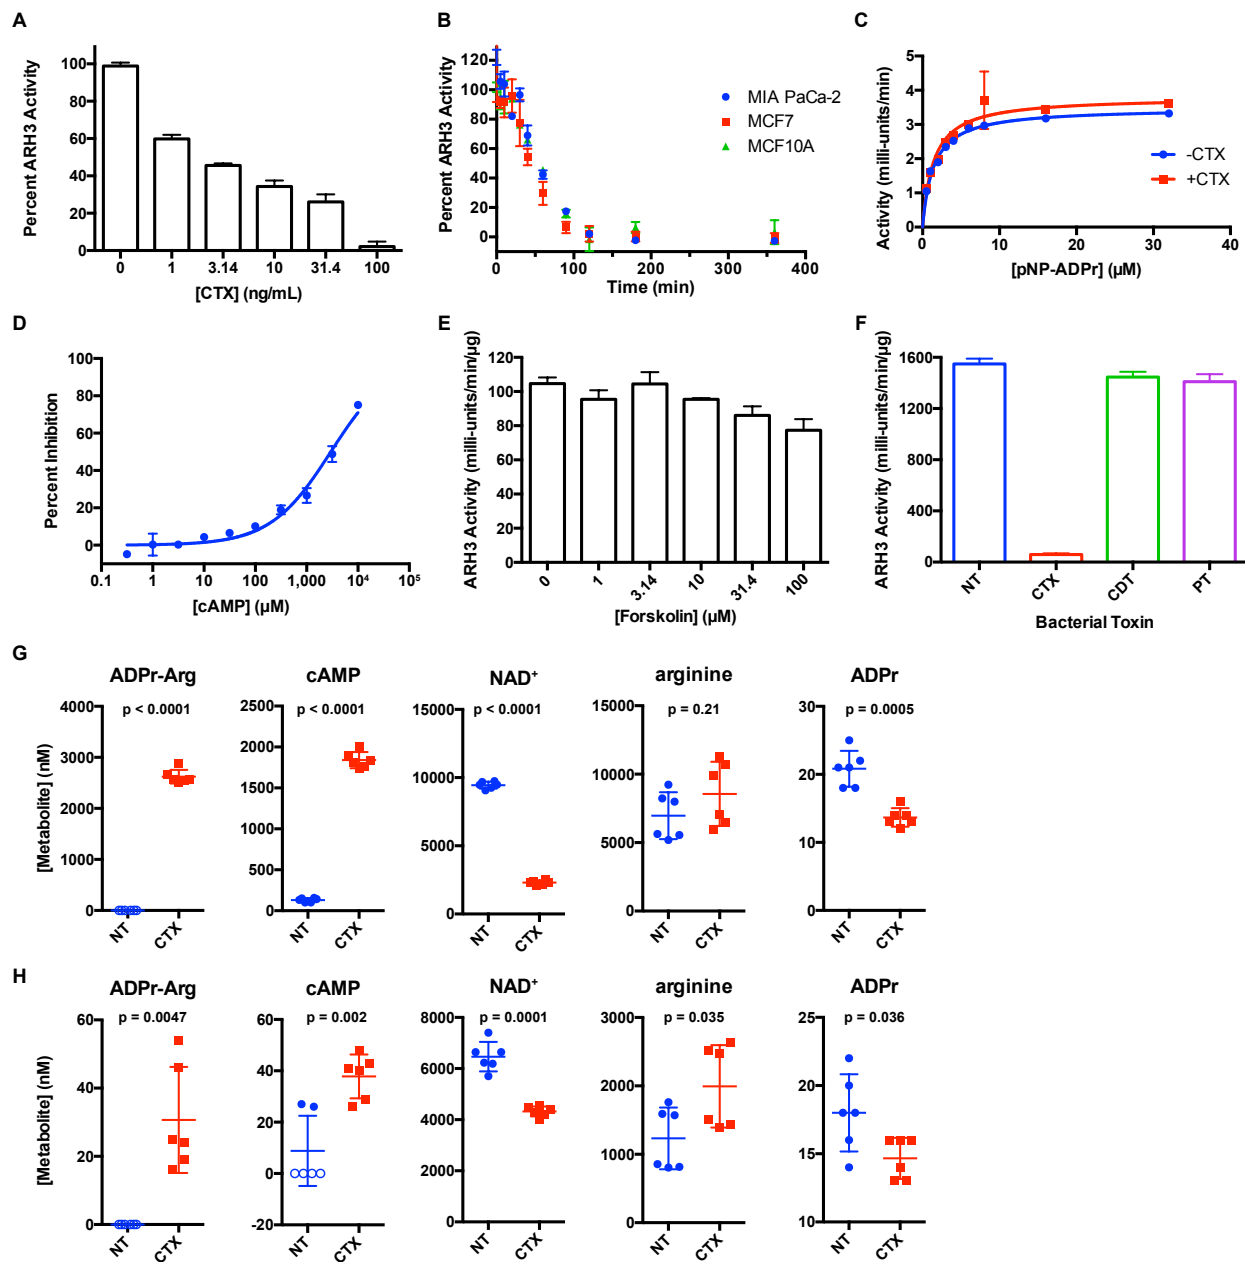

**Figure S5:** Related to Figure 6. A. MCF10A cells were cultured in the absence of CTX for five passages. Cells were plated  $1 \times 10^5$  cells/well in 6-well plate. Cells were treated with varied concentration of CTX for 48 h. Remaining ARH3 activity was measured with 200  $\mu$ M **TFMU-IDPr**. B. Cells were plated  $3 \times 10^5$  cells/well in 6-well plate. Cells were treated with 100 ng/mL CTX for the indicated period of time. Remaining ARH3 activity was measured with 200  $\mu$ M **TFMU-IDPr**. C. In vitro activity of purified ARH3 in the presence or absence of 100 ng/mL CTX. D. Dose-response curve of ARH3 inhibition by cAMP using 200  $\mu$ M **TFMU-IDPr**. E. MCF10A cells treated with forskolin for 1 h. F. A549 cells treated with various bacterial toxins for 24 h. Following treatment, ARH3 activity in cell lysate was assessed. CTX, cholera toxin 100 ng/mL; CDT, *C. difficile* toxin 200 ng/mL CDTa 400 ng/mL CDTb; PT, pertussis toxin 100 ng/mL. G. Metabolic profiling of MCF7 cells treated with 100 ng/mL CTX for 6 h. Metabolites (ADPr-Arg, cAMP, ADP-ribose, NAD<sup>+</sup>, and arginine) in methanolic cell extract were quantified by LC-MS/MS. Samples below the limit of detection are indicated by open points. Error bars represent standard deviation,  $n = 6$ . P values are from unpaired t-test with Welch's correction H. Same as G but with U2OS cells.

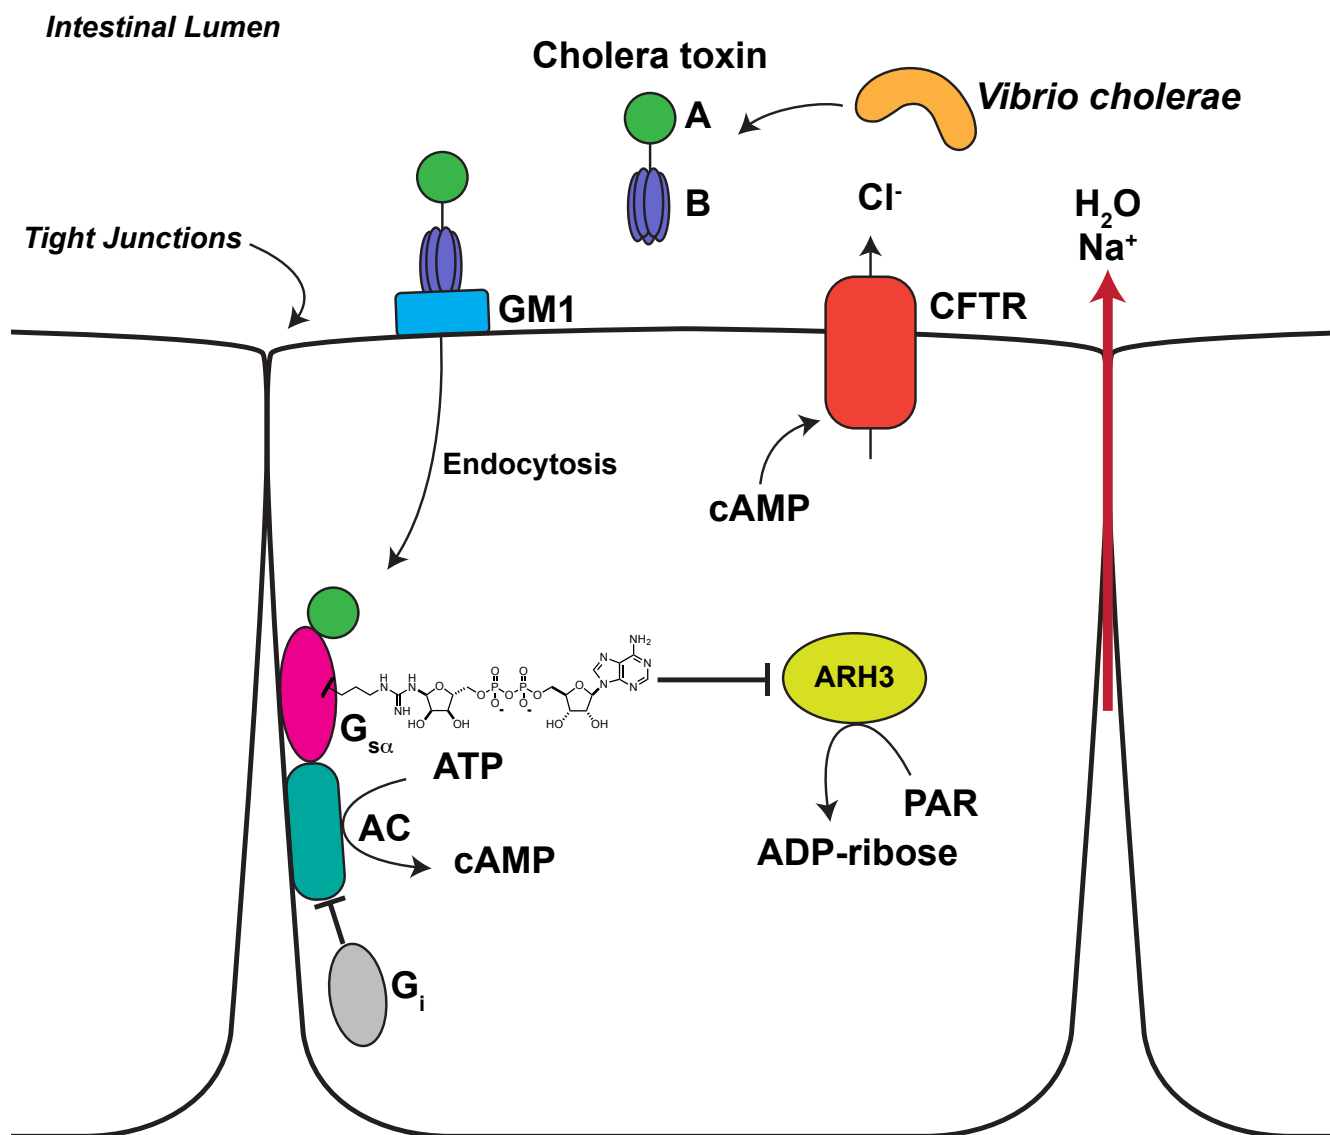

**Figure S6:** Related to Figure 6. Canonical mechanism of action for cholera toxin and involvement of ARH3. Cholera toxin is secreted as a binary toxin by *Vibrio cholerae* within the intestinal lumen. Subunit B binds to GM1 receptor and is endocytosed. Subunit A contains an ADP-ribosyltransferase domain that ADP-ribosylates  $G_{s\alpha}$ . This PTM causes constitutive activation of  $G_{s\alpha}$ , which activates AC leading to cAMP synthesis. Increased cAMP concentrations lead to cystic fibrosis transmembrane conductance regulator (CFTR) activation and efflux of chloride. Tight junctions are weakened leading to sodium and water leakage through the intercellular space, resulting in dehydration and loss of electrolytes (Thiagarajah and Verkman, 2012). Pertussis toxin acts through a similar manner by ADP-ribosylation of  $G_i$  which also gives rise to increased cAMP synthesis.
